# Supplementary material
Source: Frontiers journal article supplement (https://www.frontiersin.org/articles/507054)
Supplement: Data_Sheet_2.PDF [file Data_Sheet_2.PDF]

## *Supplementary Material*

### **List of Supplementary Figures**

- S1.  $^1\text{H}$  NMR Spectrum (600 MHz, Pyridine- $d_5$ ) of the new compound **1**
- S2.  $^{13}\text{C}$  NMR Spectrum (150 MHz, Pyridine- $d_5$ ) of the new compound **1**
- S3. HSQC Spectrum of the new compound **1**
- S4.  $^1\text{H}$ - $^1\text{H}$  COSY Spectrum of the new compound **1**
- S5. HMBC Spectrum of the new compound **1**
- S6. NOESY Spectrum of the new compound **1**
- S7. HRESIMS spectrum of the new compound **1**
- S8.  $^1\text{H}$  NMR Spectrum (600 MHz, Pyridine- $d_5$ ) of the new compound **2**
- S9.  $^{13}\text{C}$  NMR Spectrum (150 MHz, Pyridine- $d_5$ ) of the new compound **2**
- S10. HSQC Spectrum of the new compound **2**
- S11.  $^1\text{H}$ - $^1\text{H}$  COSY Spectrum of the new compound **2**
- S12. HMBC Spectrum of the new compound **2**
- S13. NOESY Spectrum of the new compound **2**
- S14. HRESIMS spectrum of the new compound **2**
- S15.  $^1\text{H}$  NMR Spectrum (600 MHz, Pyridine- $d_5$ ) of the new compound **3**
- S16.  $^{13}\text{C}$  NMR Spectrum (150 MHz, Pyridine- $d_5$ ) of the new compound **3**
- S17. HSQC Spectrum of the new compound **3**
- S18.  $^1\text{H}$ - $^1\text{H}$  COSY Spectrum of the new compound **3**
- S19. HMBC Spectrum of the new compound **3**
- S20. NOESY Spectrum of the new compound **3**
- S21. HRESIMS spectrum of the new compound **3**
- S22.  $^1\text{H}$  NMR Spectrum (600 MHz, Pyridine- $d_5$ ) of the new compound **4**
- S23.  $^{13}\text{C}$  NMR Spectrum (150 MHz, Pyridine- $d_5$ ) of the new compound **4**
- S24. HSQC Spectrum of the new compound **4**
- S25.  $^1\text{H}$ - $^1\text{H}$  COSY Spectrum of the new compound **4**
- S26. HMBC Spectrum of the new compound **4**
- S27. NOESY Spectrum of the new compound **4**
- S28. HRESIMS spectrum of the new compound **4**
- S29.  $^1\text{H}$  NMR Spectrum (600 MHz, Pyridine- $d_5$ ) of the new compound **5**
- S30.  $^{13}\text{C}$  NMR Spectrum (150 MHz, Pyridine- $d_5$ ) of the new compound **5**
- S31. HSQC Spectrum of the new compound **5**
- S32.  $^1\text{H}$ - $^1\text{H}$  COSY Spectrum of the new compound **5**
- S33. HMBC Spectrum of the new compound **5**
- S34. NOESY Spectrum of the new compound **5**
- S35. HRESIMS spectrum of the new compound **5**
- S36.  $^1\text{H}$  NMR Spectrum (600 MHz, Pyridine- $d_5$ ) of the new compound **6**
- S37.  $^{13}\text{C}$  NMR Spectrum (150 MHz, Pyridine- $d_5$ ) of the new compound **6**
- S38. HSQC Spectrum of the new compound **6**
- S39.  $^1\text{H}$ - $^1\text{H}$  COSY Spectrum of the new compound **6**
- S40. HMBC Spectrum of the new compound **6**
- S41. NOESY Spectrum of the new compound **6**

- S42. HRESIMS spectrum of the new compound **6**
- S43.  $^1\text{H}$  NMR Spectrum (600 MHz, Pyridine- $d_5$ ) of the new compound **7**
- S44.  $^{13}\text{C}$  NMR Spectrum (150 MHz, Pyridine- $d_5$ ) of the new compound **7**
- S45. HSQC Spectrum of the new compound **7**
- S46.  $^1\text{H}$ - $^1\text{H}$  COSY Spectrum of the new compound **7**
- S47. HMBC Spectrum of the new compound **7**
- S48. NOESY Spectrum of the new compound **7**
- S49. HRESIMS spectrum of the new compound **7**
- S50.  $^1\text{H}$  NMR Spectrum (600 MHz, Pyridine- $d_5$ ) of the new compound **8**
- S51.  $^{13}\text{C}$  NMR Spectrum (150 MHz, Pyridine- $d_5$ ) of the new compound **8**
- S52. HSQC Spectrum of the new compound **8**
- S53.  $^1\text{H}$ - $^1\text{H}$  COSY Spectrum of the new compound **8**
- S54. HMBC Spectrum of the new compound **8**
- S55. NOESY Spectrum of the new compound **8**
- S56. HRESIMS spectrum of the new compound **8**
- S57.  $^1\text{H}$  NMR Spectrum (600 MHz, Pyridine- $d_5$ ) of the new compound **9**
- S58.  $^{13}\text{C}$  NMR Spectrum (150 MHz, Pyridine- $d_5$ ) of the new compound **9**
- S59. HSQC Spectrum of the new compound **9**
- S60.  $^1\text{H}$ - $^1\text{H}$  COSY Spectrum of the new compound **9**
- S61. HMBC Spectrum of the new compound **9**
- S62. NOESY Spectrum of the new compound **9**
- S63. HRESIMS spectrum of the new compound **9**
- S64.  $^1\text{H}$  NMR Spectrum (600 MHz, Pyridine- $d_5$ ) of the new compound **10**
- S65.  $^{13}\text{C}$  NMR Spectrum (150 MHz, Pyridine- $d_5$ ) of the new compound **10**
- S66. HSQC Spectrum of the new compound **10**
- S67.  $^1\text{H}$ - $^1\text{H}$  COSY Spectrum of the new compound **10**
- S68. HMBC Spectrum of the new compound **10**
- S69. NOESY Spectrum of the new compound **10**
- S70. HRESIMS spectrum of the new compound **10**
- S71.  $^1\text{H}$  NMR Spectrum (600 MHz, Pyridine- $d_5$ ) of the new compound **11**
- S72.  $^{13}\text{C}$  NMR Spectrum (150 MHz, Pyridine- $d_5$ ) of the new compound **11**
- S73. HSQC Spectrum of the new compound **11**
- S74.  $^1\text{H}$ - $^1\text{H}$  COSY Spectrum of the new compound **11**
- S75. HMBC Spectrum of the new compound **11**
- S76. NOESY Spectrum of the new compound **11**
- S77. HRESIMS spectrum of the new compound **11**
- S78.  $^1\text{H}$  NMR Spectrum (600 MHz, Pyridine- $d_5$ ) of the new compound **12**
- S79.  $^{13}\text{C}$  NMR Spectrum (150 MHz, Pyridine- $d_5$ ) of the new compound **12**
- S80. HSQC Spectrum of the new compound **12**
- S81.  $^1\text{H}$ - $^1\text{H}$  COSY Spectrum of the new compound **12**
- S82. HMBC Spectrum of the new compound **12**
- S83. NOESY Spectrum of the new compound **12**
- S84. HRESIMS spectrum of the new compound **12**
- S85.  $^1\text{H}$  NMR Spectrum (600 MHz, Pyridine- $d_5$ ) of the new compound **13**
- S86.  $^{13}\text{C}$  NMR Spectrum (150 MHz, Pyridine- $d_5$ ) of the new compound **13**
- S87. HSQC Spectrum of the new compound **13**
- S88.  $^1\text{H}$ - $^1\text{H}$  COSY Spectrum of the new compound **13**

S89. HMBC Spectrum of the new compound **13**  
 S90. NOESY Spectrum of the new compound **13**  
 S91. HRESIMS spectrum of the new compound **13**  
 S92. <sup>1</sup>H NMR Spectrum (600 MHZ, Pyridine-*d*<sub>5</sub>) of the new compound **14**  
 S93. <sup>13</sup>C NMR Spectrum (150 MHZ, Pyridine-*d*<sub>5</sub>) of the new compound **14**  
 S94. HSQC Spectrum of the new compound **14**  
 S95. <sup>1</sup>H-<sup>1</sup>H COSY Spectrum of the new compound **14**  
 S96. HMBC Spectrum of the new compound **14**  
 S97. NOESY Spectrum of the new compound **14**  
 S98. HRESIMS spectrum of the new compound **14**  
 S99. The structure of compound **14a**  
 S100. The structures of compounds **15-33**  
 S101. <sup>1</sup>H NMR Spectrum (600 MHZ, Pyridine-*d*<sub>5</sub>) of the new compound **15**  
 S102. <sup>13</sup>C NMR Spectrum (150 MHZ, Pyridine-*d*<sub>5</sub>) of the new compound **15**  
 S103. HRESIMS spectrum of the new compound **15**  
 S104. <sup>1</sup>H NMR Spectrum (600 MHZ, Pyridine-*d*<sub>5</sub>) of the new compound **16**  
 S105. <sup>13</sup>C NMR Spectrum (150 MHZ, Pyridine-*d*<sub>5</sub>) of the new compound **16**  
 S106. HRESIMS spectrum of the new compound **16**  
 S107. <sup>1</sup>H NMR Spectrum (600 MHZ, Pyridine-*d*<sub>5</sub>) of the new compound **17**  
 S108. <sup>13</sup>C NMR Spectrum (150 MHZ, Pyridine-*d*<sub>5</sub>) of the new compound **17**  
 S109. HRESIMS spectrum of the new compound **17**  
 S110. <sup>1</sup>H NMR Spectrum (600 MHZ, Pyridine-*d*<sub>5</sub>) of the new compound **18**  
 S111. <sup>13</sup>C NMR Spectrum (150 MHZ, Pyridine-*d*<sub>5</sub>) of the new compound **18**  
 S112. HRESIMS spectrum of the new compound **18**  
 S113. <sup>1</sup>H NMR Spectrum (600 MHZ, Pyridine-*d*<sub>5</sub>) of the new compound **19**  
 S114. <sup>13</sup>C NMR Spectrum (150 MHZ, Pyridine-*d*<sub>5</sub>) of the new compound **19**  
 S115. HRESIMS spectrum of the new compound **19**  
 S116. <sup>1</sup>H NMR Spectrum (600 MHZ, Pyridine-*d*<sub>5</sub>) of the new compound **20**  
 S117. <sup>13</sup>C NMR Spectrum (150 MHZ, Pyridine-*d*<sub>5</sub>) of the new compound **20**  
 S118. HRESIMS spectrum of the new compound **20**  
 S119. <sup>1</sup>H NMR Spectrum (600 MHZ, Pyridine-*d*<sub>5</sub>) of the new compound **21**  
 S120. <sup>13</sup>C NMR Spectrum (150 MHZ, Pyridine-*d*<sub>5</sub>) of the new compound **21**  
 S121. HRESIMS spectrum of the new compound **21**  
 S122. <sup>1</sup>H NMR Spectrum (600 MHZ, Pyridine-*d*<sub>5</sub>) of the new compound **22**  
 S123. <sup>13</sup>C NMR Spectrum (150 MHZ, Pyridine-*d*<sub>5</sub>) of the new compound **22**  
 S124. HRESIMS spectrum of the new compound **22**  
 S125. <sup>1</sup>H NMR Spectrum (600 MHZ, Pyridine-*d*<sub>5</sub>) of the new compound **23**  
 S126. <sup>13</sup>C NMR Spectrum (150 MHZ, Pyridine-*d*<sub>5</sub>) of the new compound **23**  
 S127. HRESIMS spectrum of the new compound **23**  
 S128. <sup>1</sup>H NMR Spectrum (600 MHZ, Pyridine-*d*<sub>5</sub>) of the new compound **24**  
 S129. <sup>13</sup>C NMR Spectrum (150 MHZ, Pyridine-*d*<sub>5</sub>) of the new compound **24**  
 S130. HRESIMS spectrum of the new compound **24**  
 S131. <sup>1</sup>H NMR Spectrum (600 MHZ, Pyridine-*d*<sub>5</sub>) of the new compound **25**  
 S132. <sup>13</sup>C NMR Spectrum (150 MHZ, Pyridine-*d*<sub>5</sub>) of the new compound **25**  
 S133. HRESIMS spectrum of the new compound **25**  
 S134. <sup>1</sup>H NMR Spectrum (600 MHZ, Pyridine-*d*<sub>5</sub>) of the new compound **26**  
 S135. <sup>13</sup>C NMR Spectrum (150 MHZ, Pyridine-*d*<sub>5</sub>) of the new compound **26**  
 S136. HRESIMS spectrum of the new compound **26**

- S137.  $^1\text{H}$  NMR Spectrum (600 MHZ, Pyridine- $d_5$ ) of the new compound **27**  
S138.  $^{13}\text{C}$  NMR Spectrum (150 MHZ, Pyridine- $d_5$ ) of the new compound **27**  
S139. HRESIMS spectrum of the new compound **27**  
S140.  $^1\text{H}$  NMR Spectrum (600 MHZ, Pyridine- $d_5$ ) of the new compound **28**  
S141.  $^{13}\text{C}$  NMR Spectrum (150 MHZ, Pyridine- $d_5$ ) of the new compound **28**  
S142. HRESIMS spectrum of the new compound **28**  
S143.  $^1\text{H}$  NMR Spectrum (600 MHZ, Pyridine- $d_5$ ) of the new compound **29**  
S144.  $^{13}\text{C}$  NMR Spectrum (150 MHZ, Pyridine- $d_5$ ) of the new compound **29**  
S145. HRESIMS spectrum of the new compound **29**  
S146.  $^1\text{H}$  NMR Spectrum (600 MHZ, Pyridine- $d_5$ ) of the new compound **30**  
S147.  $^{13}\text{C}$  NMR Spectrum (150 MHZ, Pyridine- $d_5$ ) of the new compound **30**  
S148. HRESIMS spectrum of the new compound **30**  
S149.  $^1\text{H}$  NMR Spectrum (600 MHZ, Methanol- $d_4$ ) of the new compound **31**  
S150.  $^{13}\text{C}$  NMR Spectrum (150 MHZ, Methanol- $d_4$ ) of the new compound **31**  
S151. HRESIMS spectrum of the new compound **31**  
S152.  $^1\text{H}$  NMR Spectrum (600 MHZ, Methanol- $d_4$ ) of the new compound **32**  
S153.  $^{13}\text{C}$  NMR Spectrum (150 MHZ, Methanol- $d_4$ ) of the new compound **32**  
S154. HRESIMS spectrum of the new compound **32**  
S155.  $^1\text{H}$  NMR Spectrum (600 MHZ, Pyridine- $d_5$ ) of the new compound **33**  
S156.  $^{13}\text{C}$  NMR Spectrum (150 MHZ, Pyridine- $d_5$ ) of the new compound **33**  
S157. HRESIMS spectrum of the new compound **33**



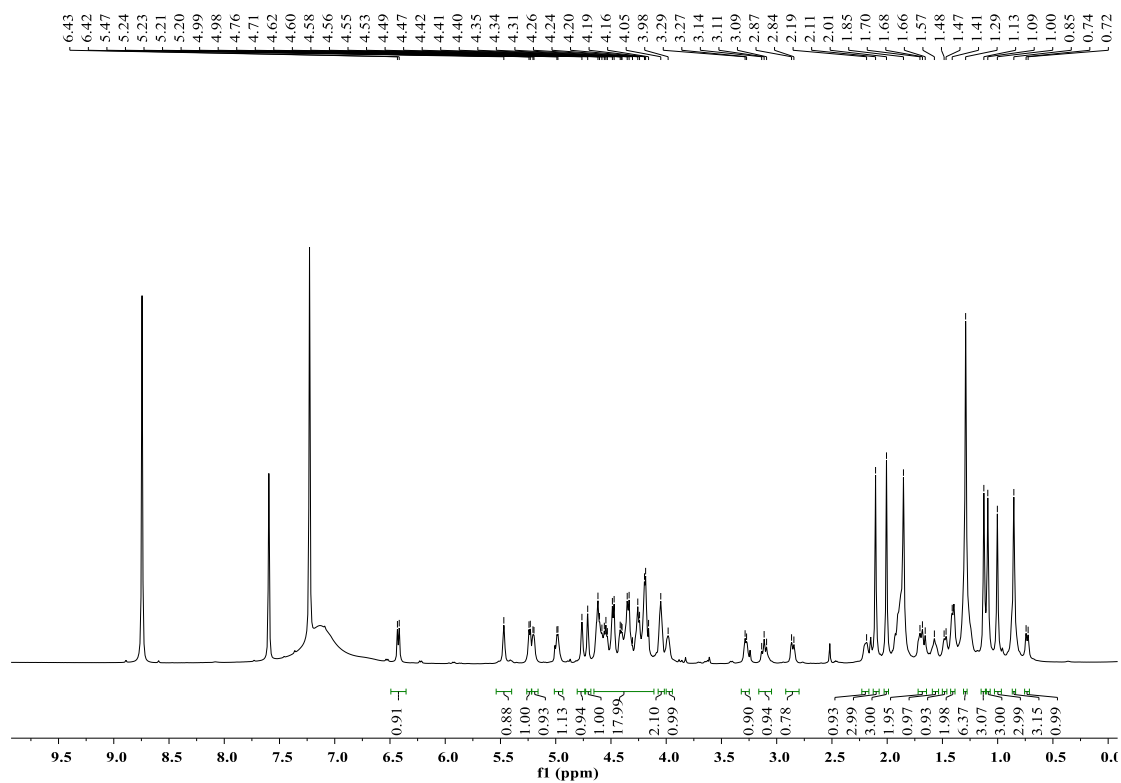

**S1.** <sup>1</sup>H NMR Spectrum (600 MHz, Pyridine-*d*<sub>5</sub>) of the new compound **1**

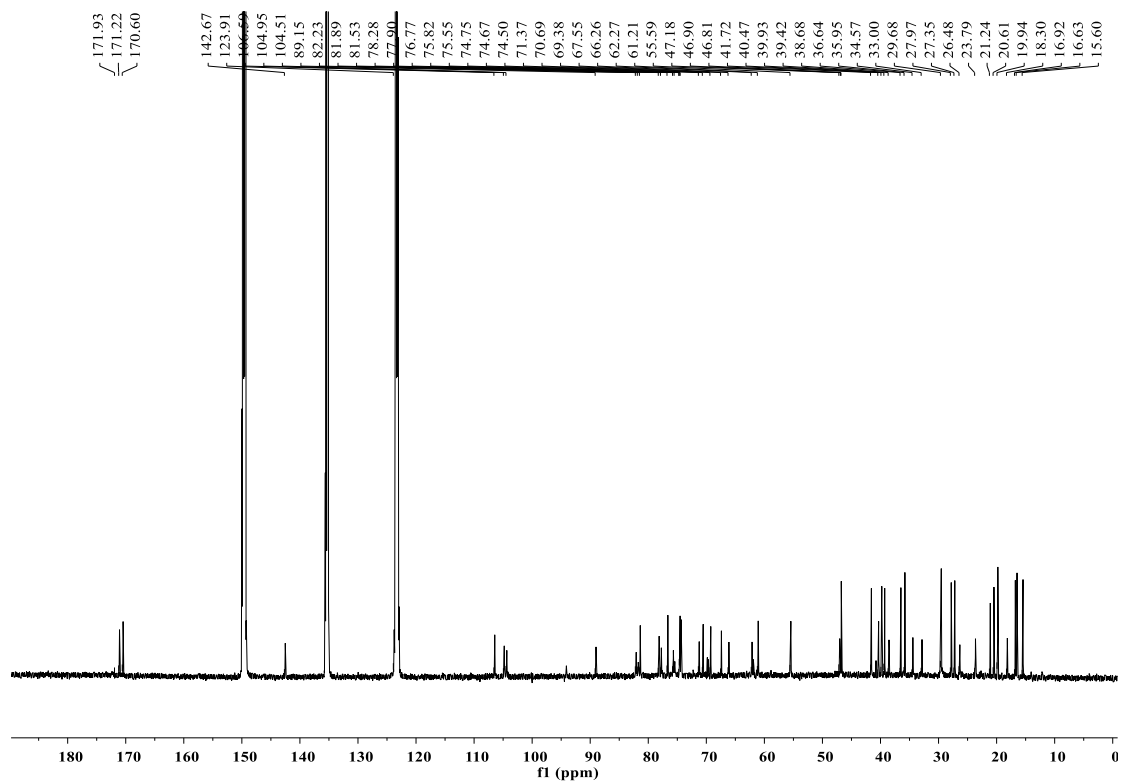

**S2.** <sup>13</sup>C NMR Spectrum (150 MHz, Pyridine-*d*<sub>5</sub>) of the new compound **1**

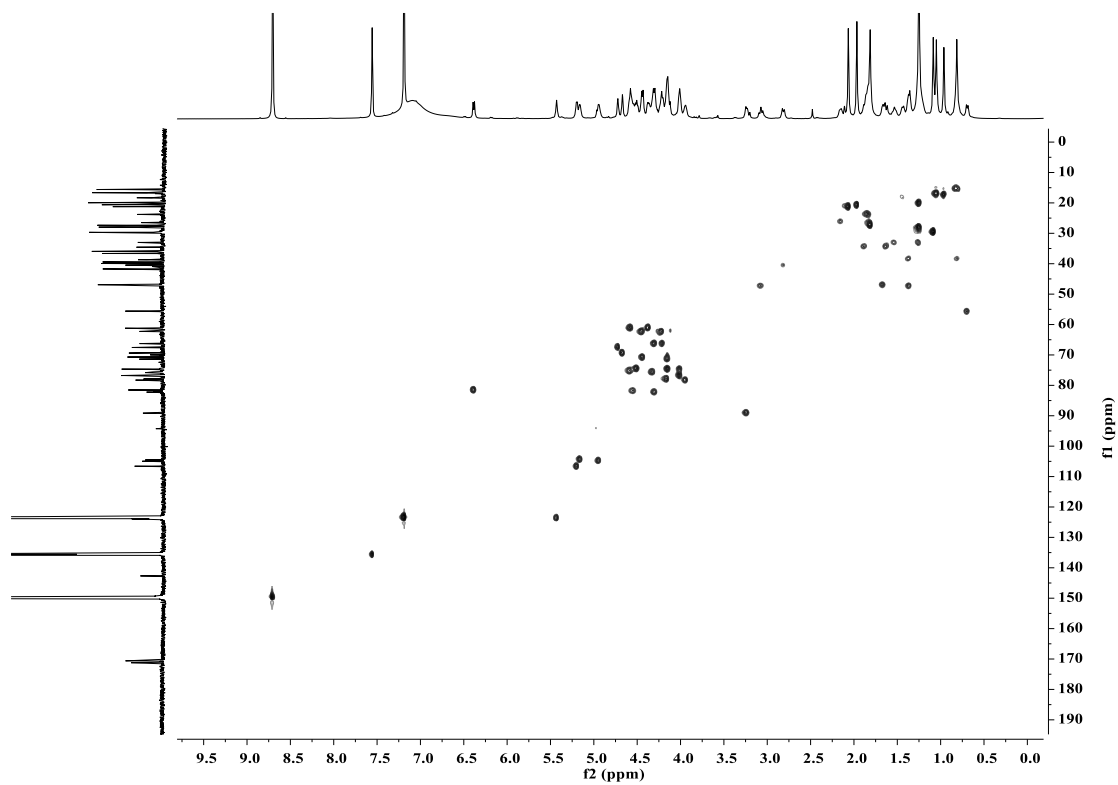**S3.** HSQC Spectrum of the new compound **1**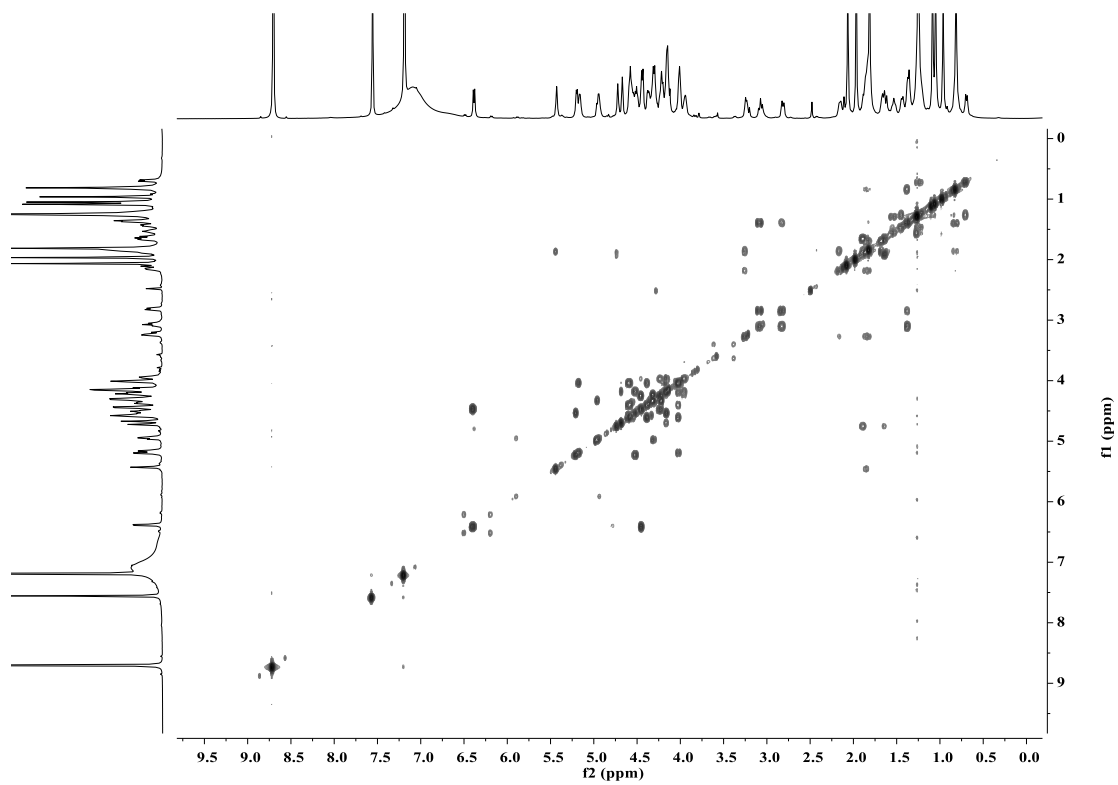**S4.**  $^1\text{H}$ - $^1\text{H}$  COSY Spectrum of the new compound **1**

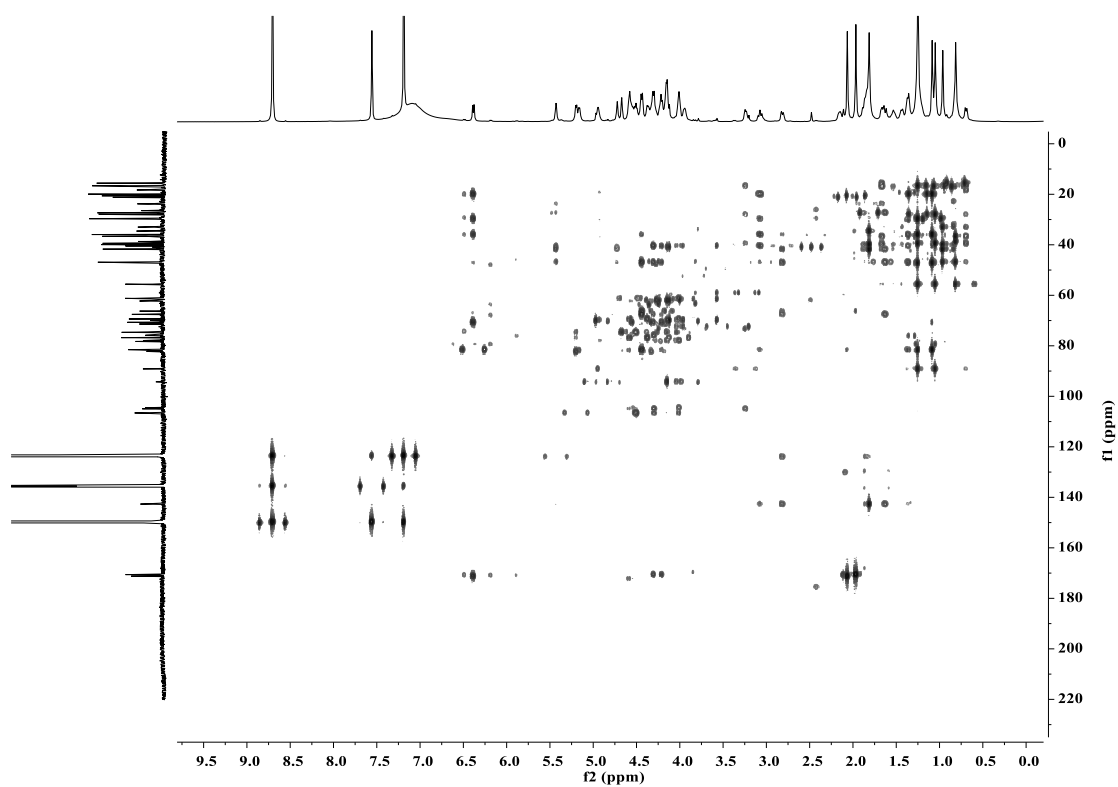

**S5.** HMBC Spectrum of the new compound **1**

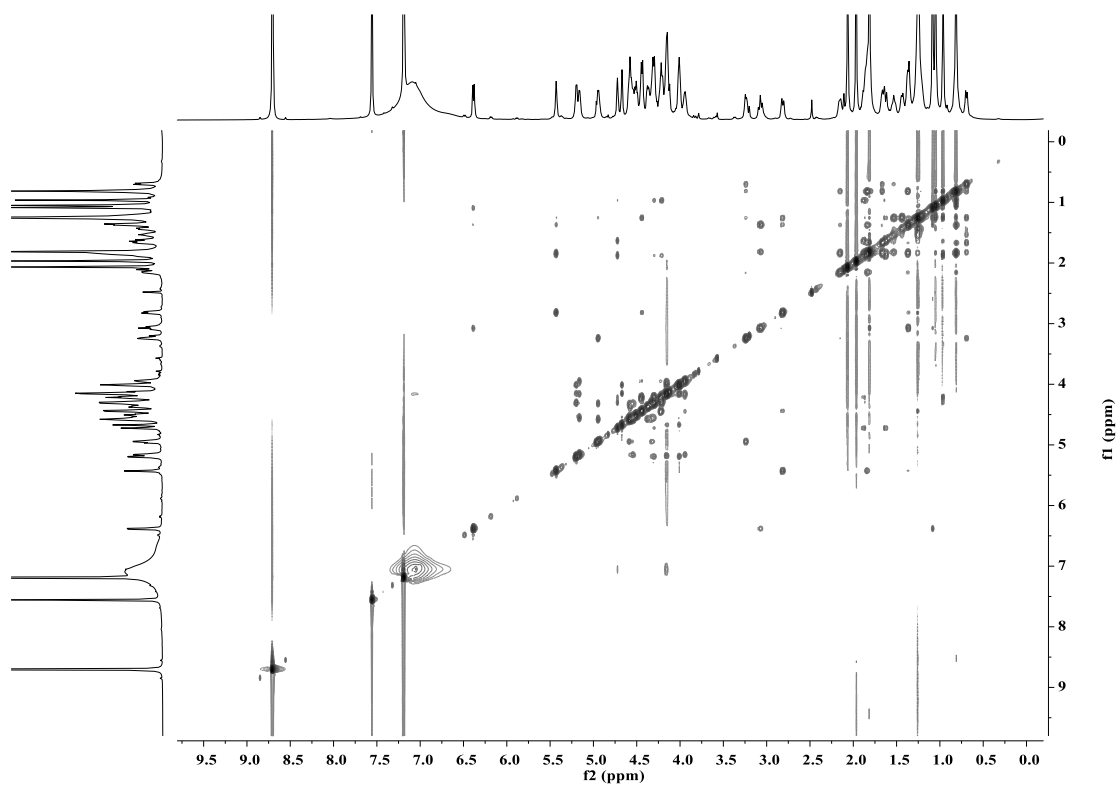

**S6.** NOESY Spectrum of the new compound **1**

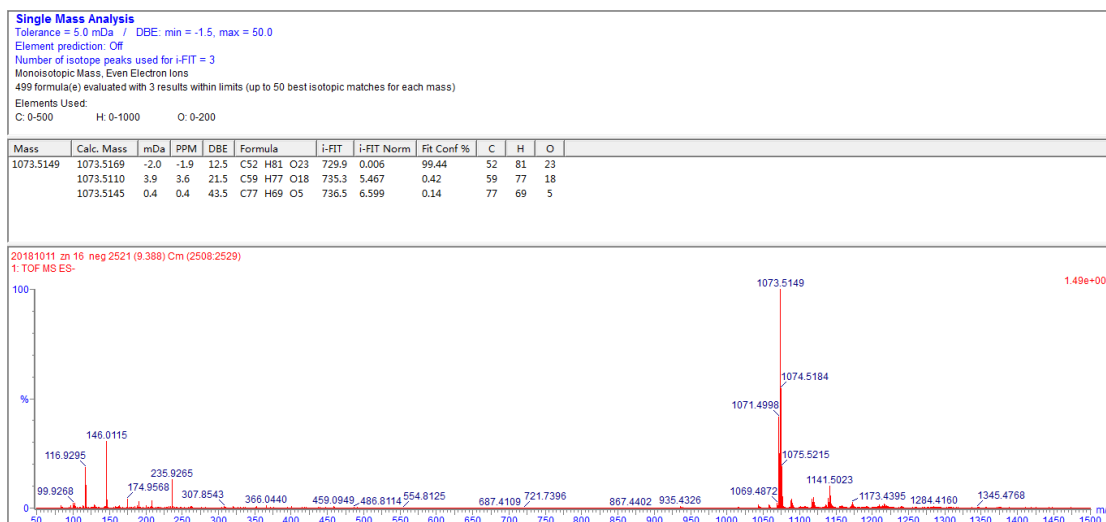

S7. HRESIMS spectrum of the new compound 1

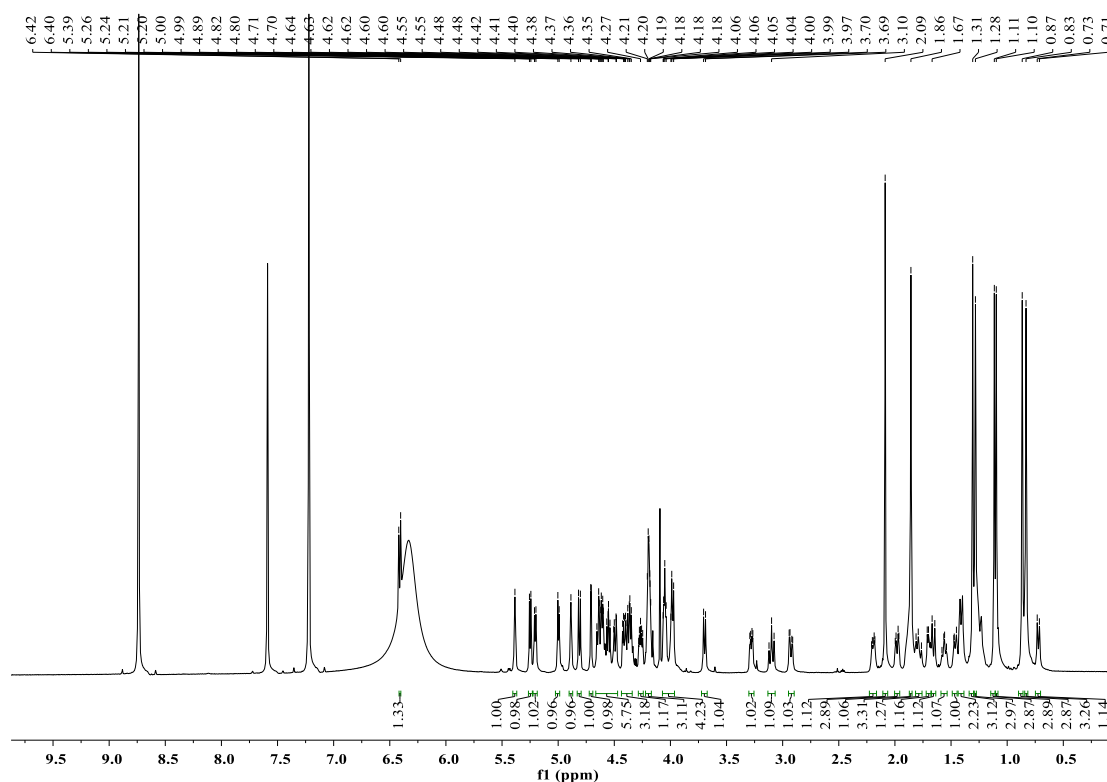S8.  $^1\text{H}$  NMR Spectrum (600 MHz, Pyridine- $d_5$ ) of the new compound 2

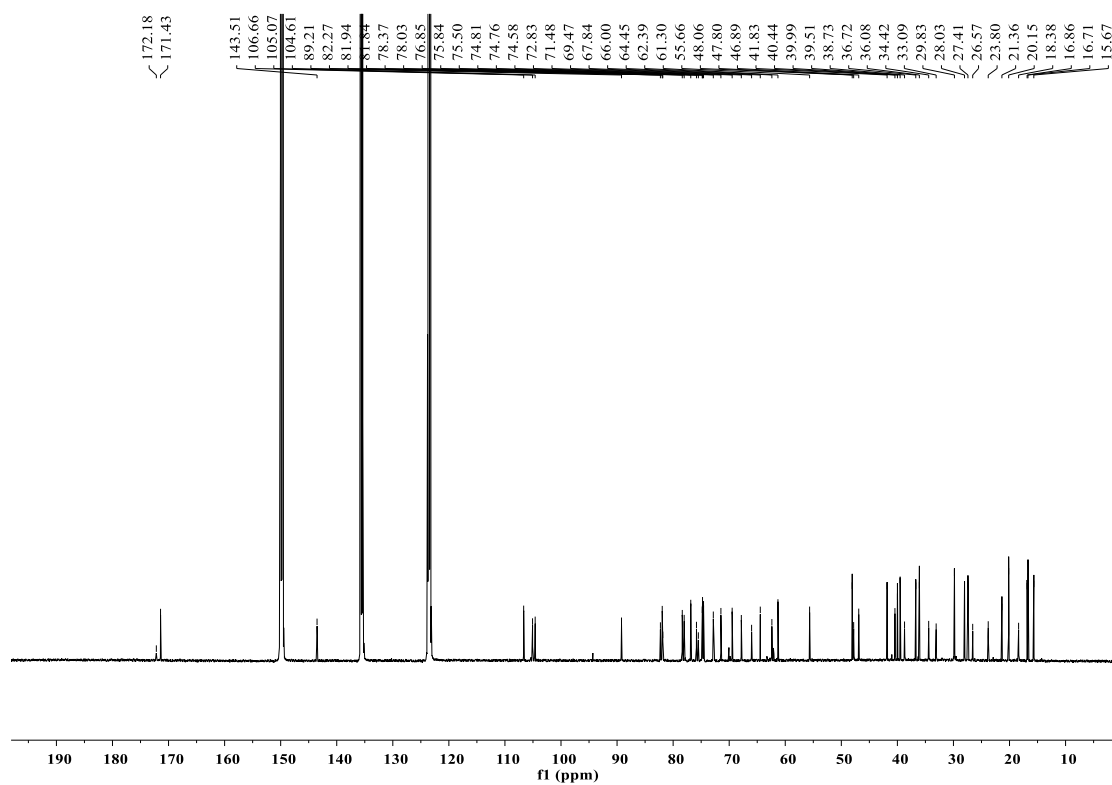

**S9.** <sup>13</sup>C NMR Spectrum (150 MHz, Pyridine-*d*<sub>5</sub>) of the new compound **2**

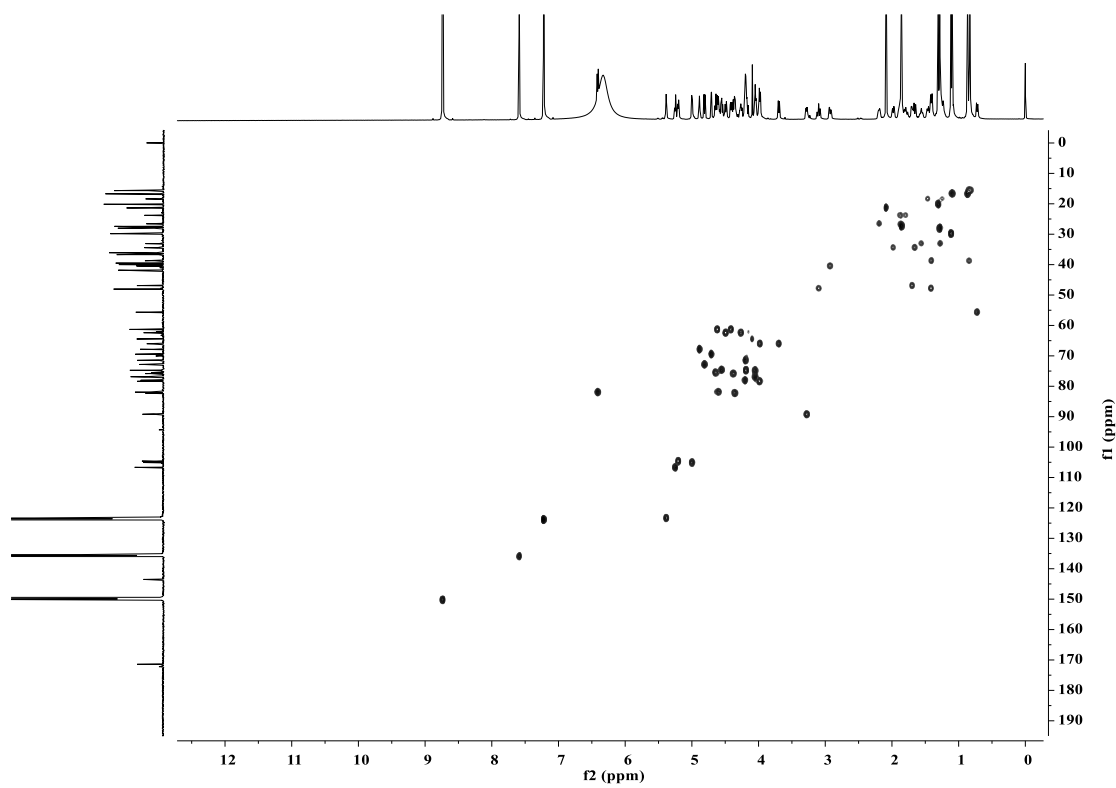

**S10.** HSQC Spectrum of the new compound **2**

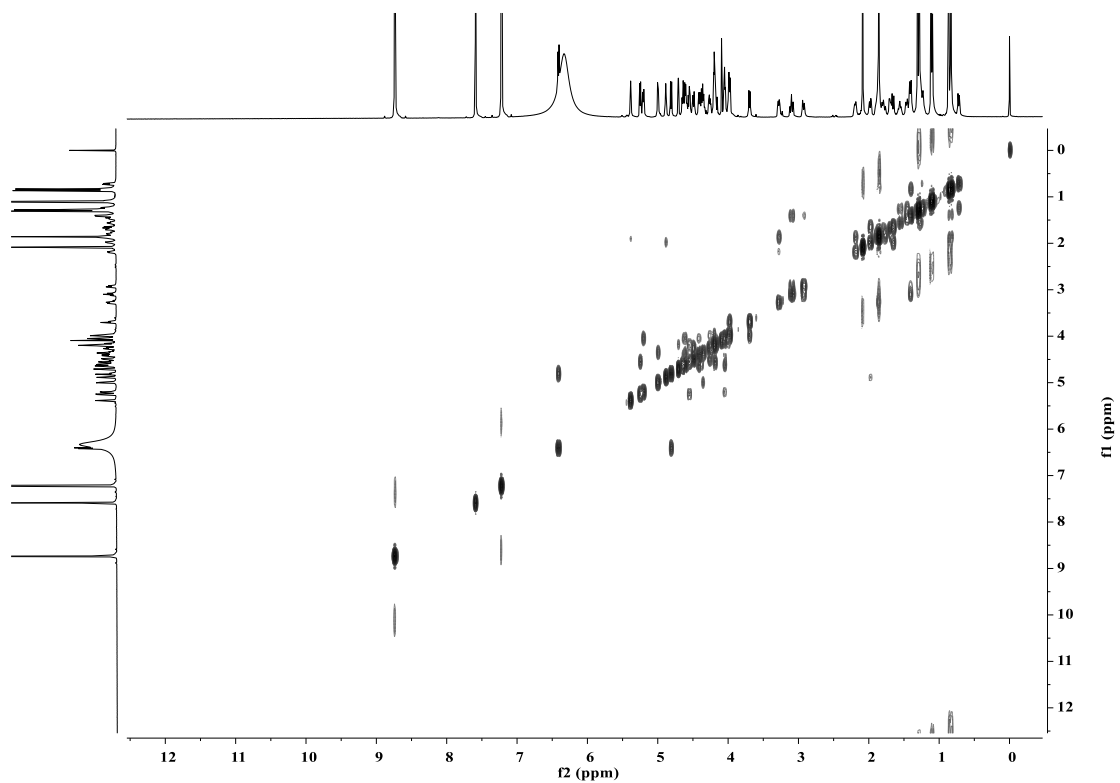

**S11.**  $^1\text{H}$ - $^1\text{H}$  COSY Spectrum of the new compound **2**

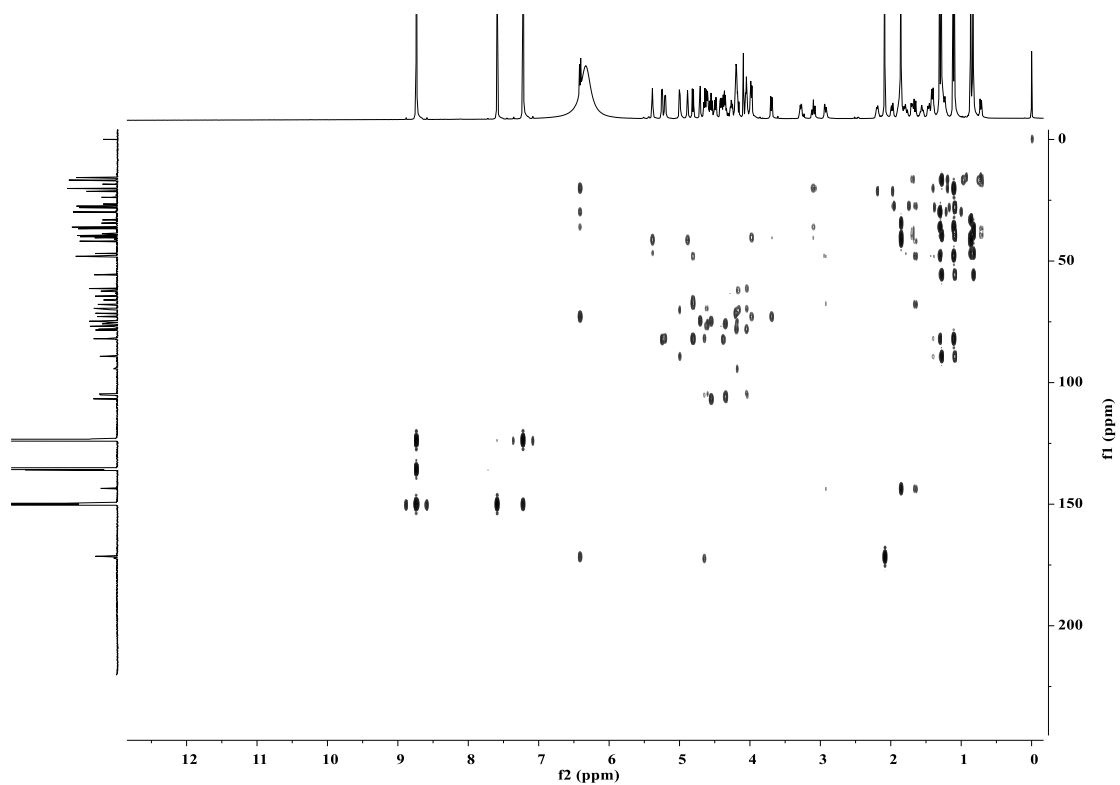

**S12.** HMBC Spectrum of the new compound **2**

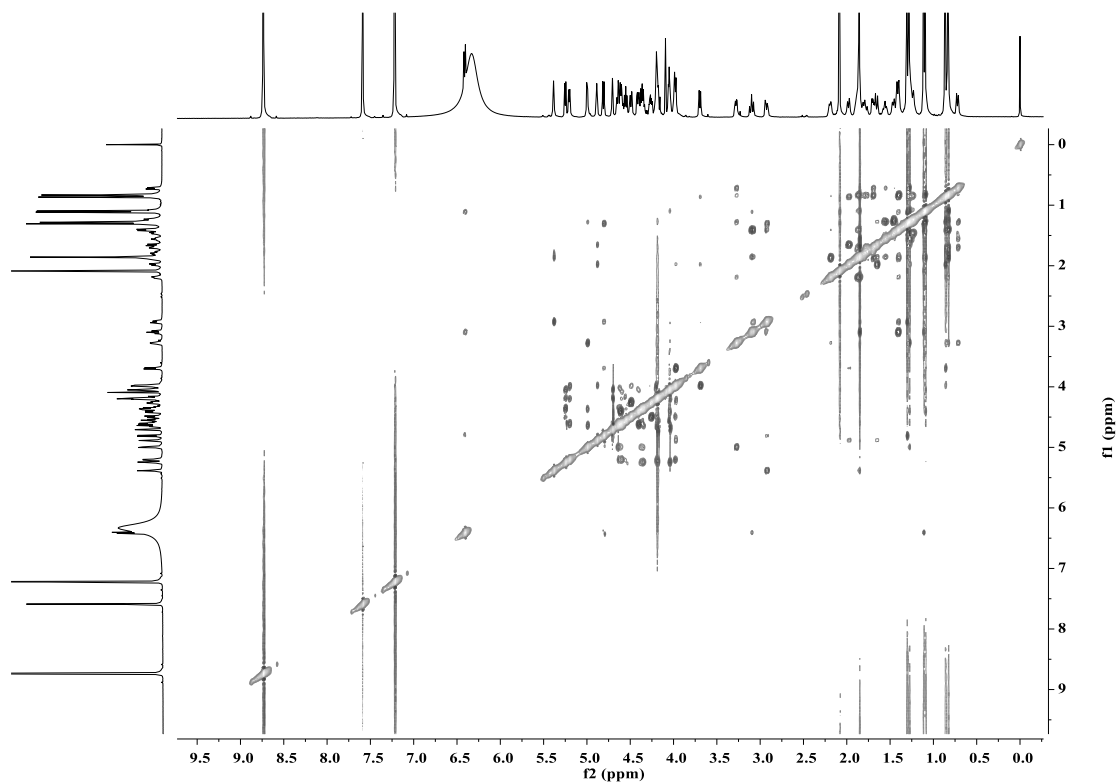

**S13.** NOESY Spectrum of the new compound **2**

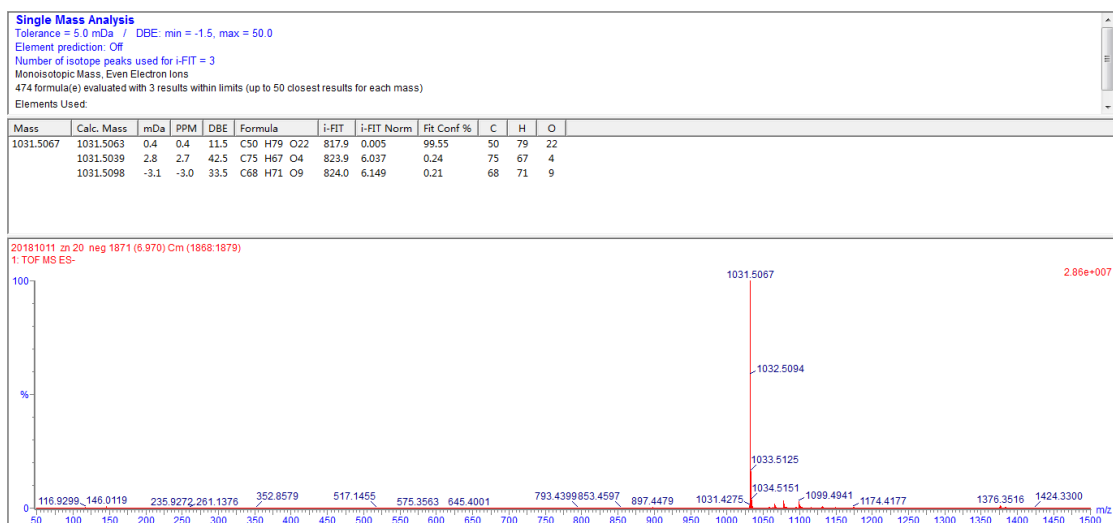

**S14.** HRESIMS spectrum of the new compound **2**

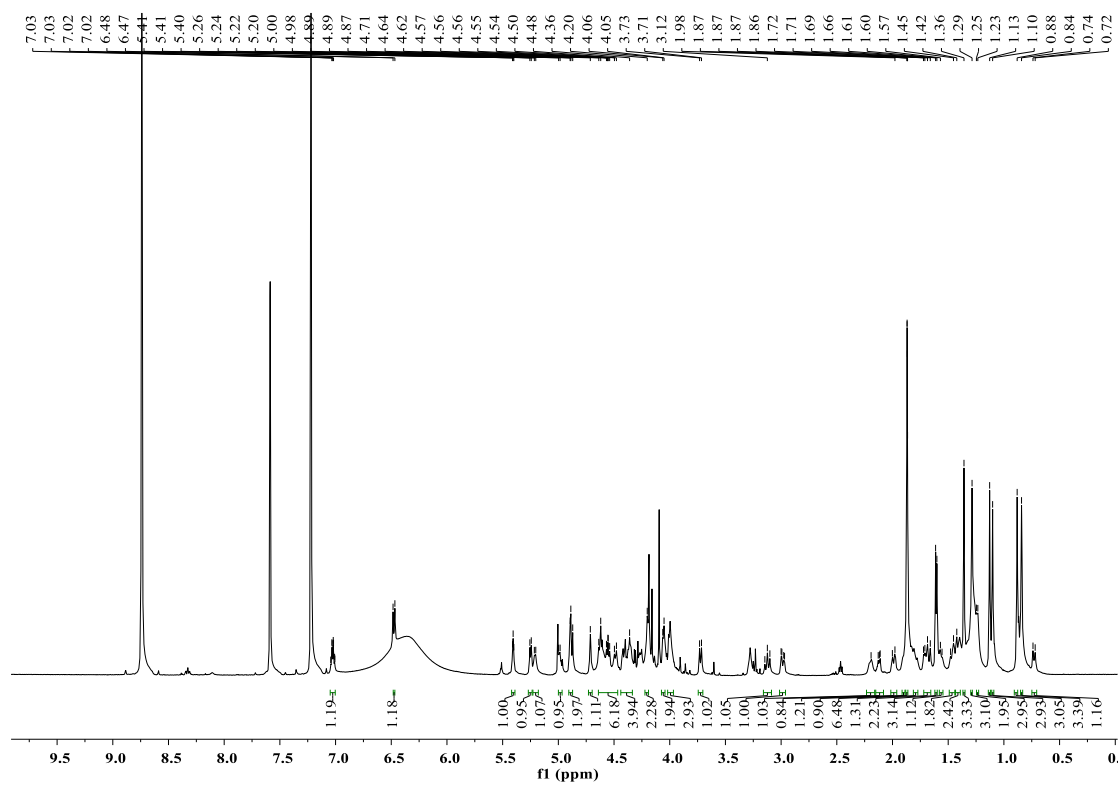

**S15.** <sup>1</sup>H NMR Spectrum (600 MHz, Pyridine-*d*<sub>5</sub>) of the new compound **3**

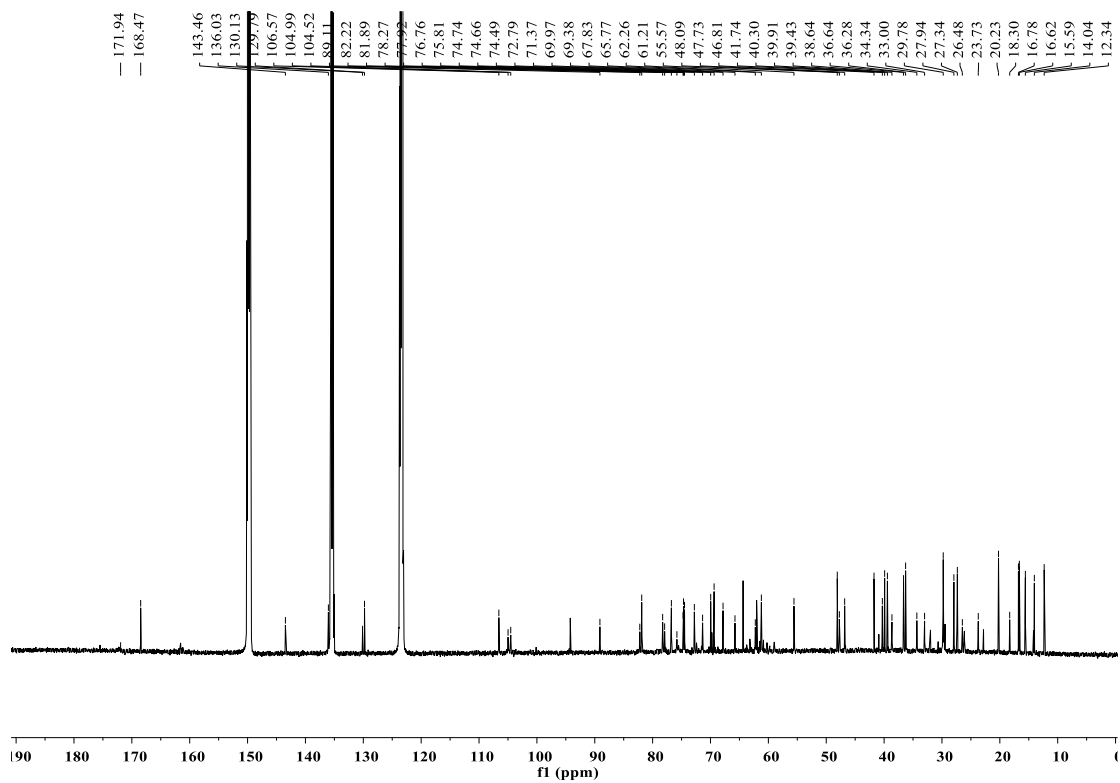

**S16.** <sup>13</sup>C NMR Spectrum (150 MHz, Pyridine-*d*<sub>5</sub>) of the new compound **3**



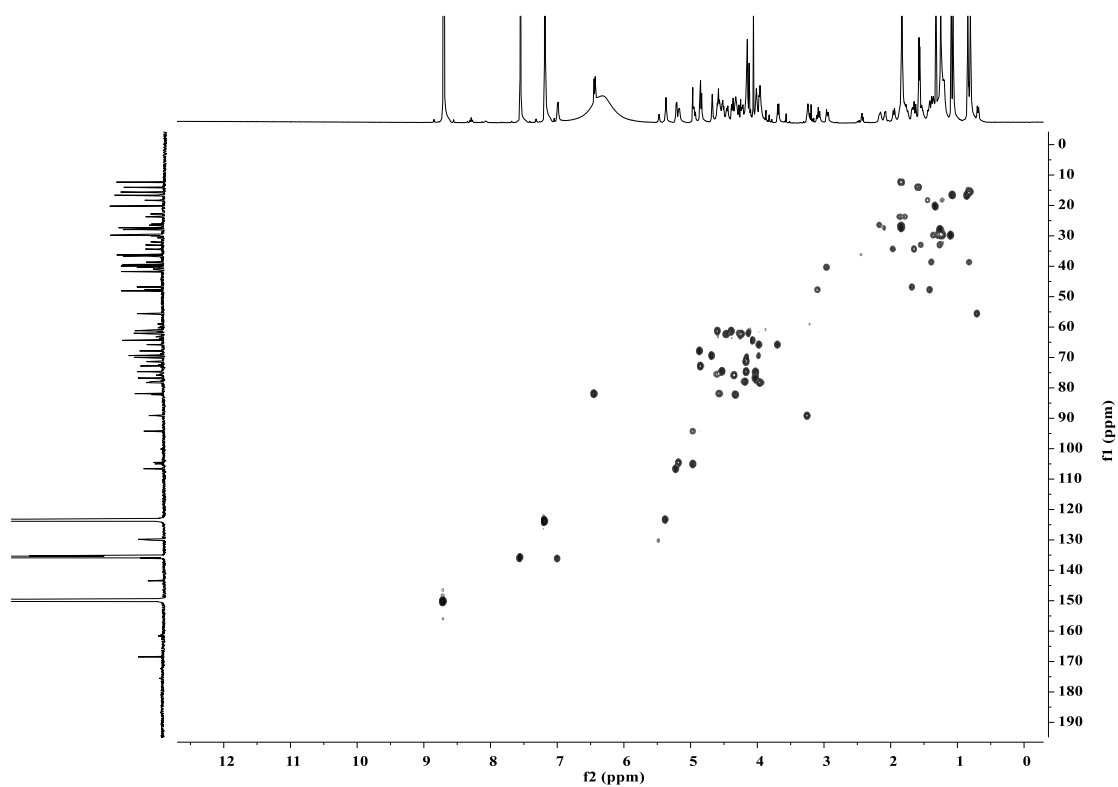

**S17.** HSQC Spectrum of the new compound **3**

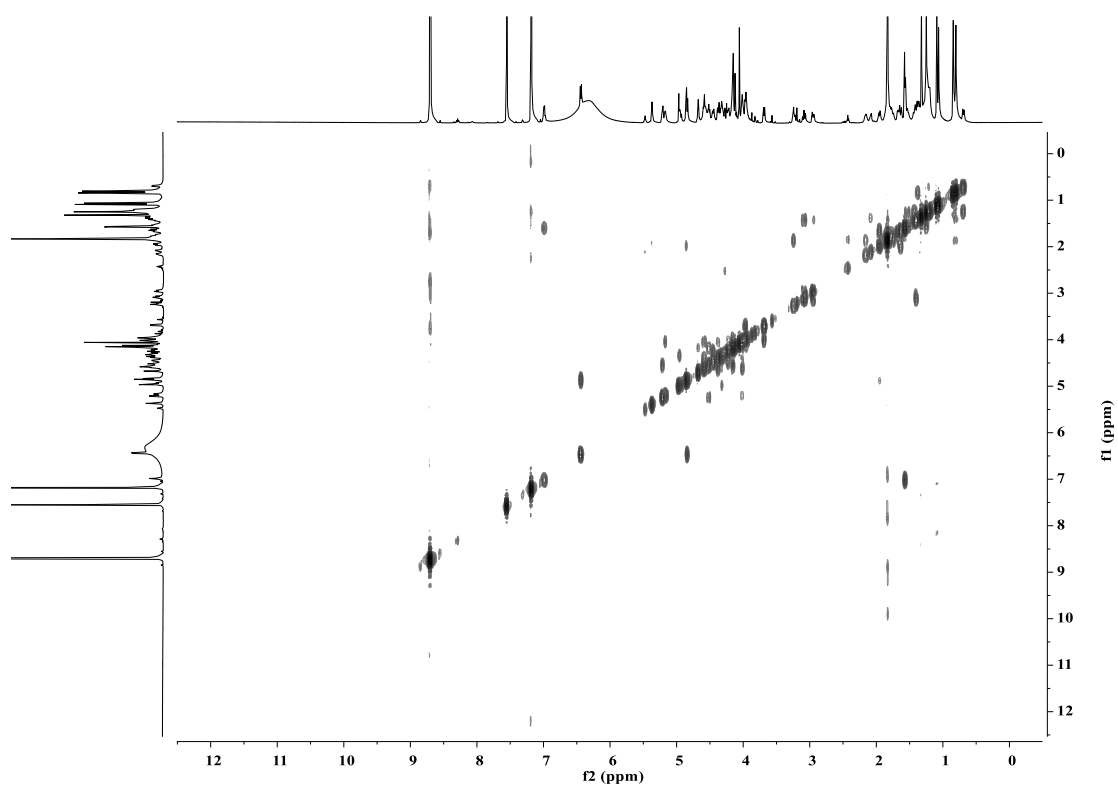

**S18.**  $^1\text{H}$ - $^1\text{H}$  COSY Spectrum of the new compound **3**

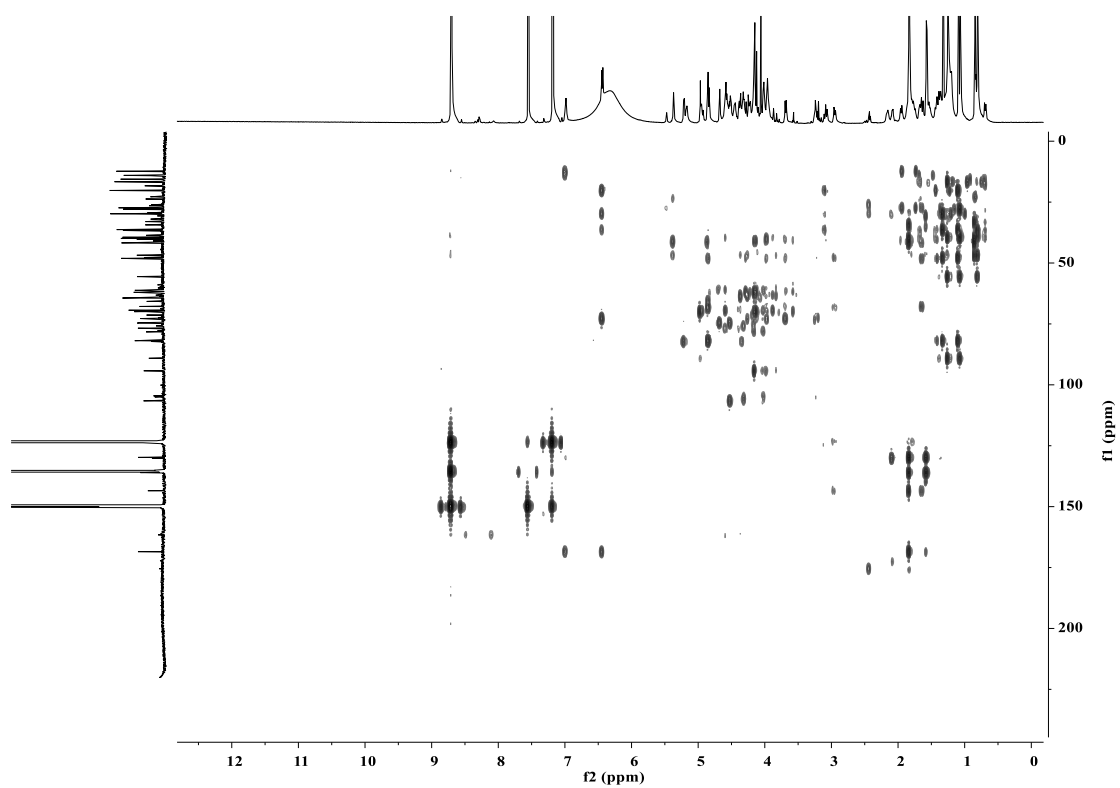

**S19.** HMBC Spectrum of the new compound **3**

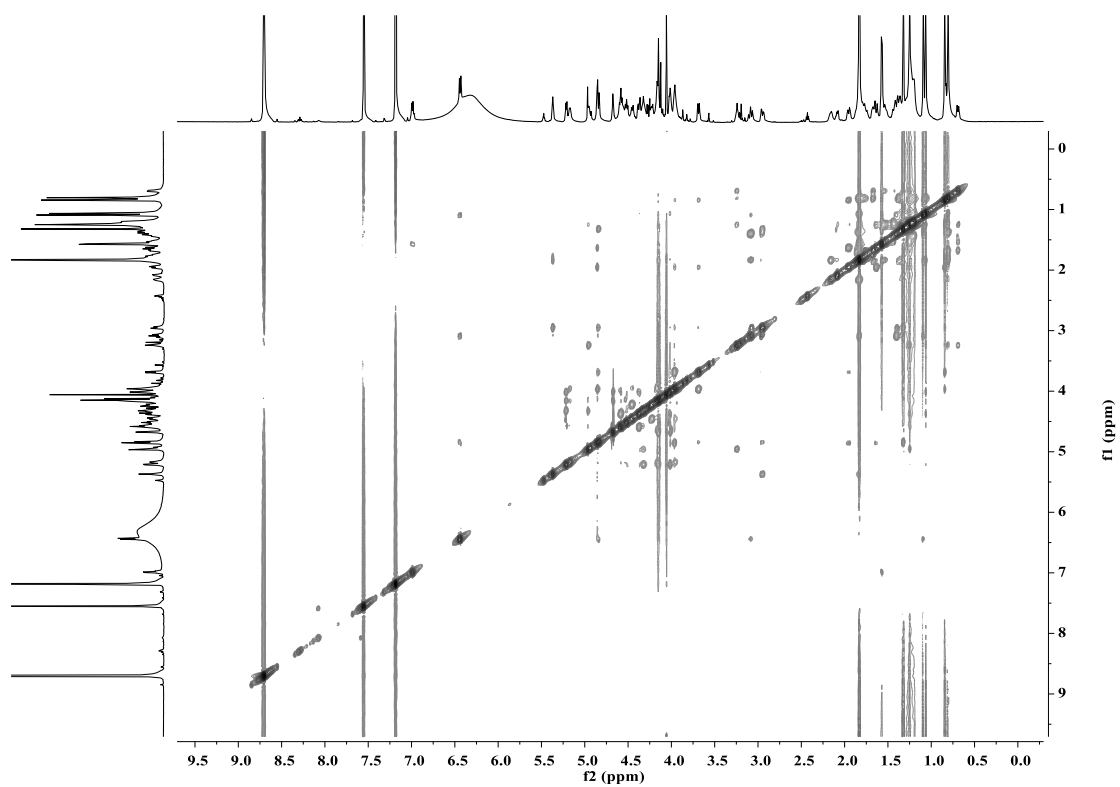

**S20.** NOESY Spectrum of the new compound **3**

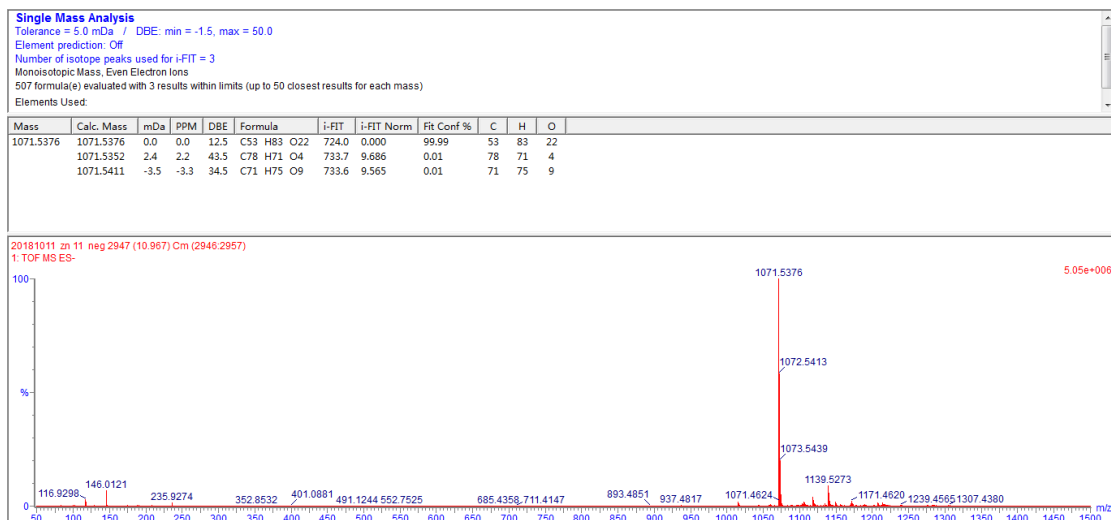

**S21.** HRESIMS spectrum of the new compound **3**

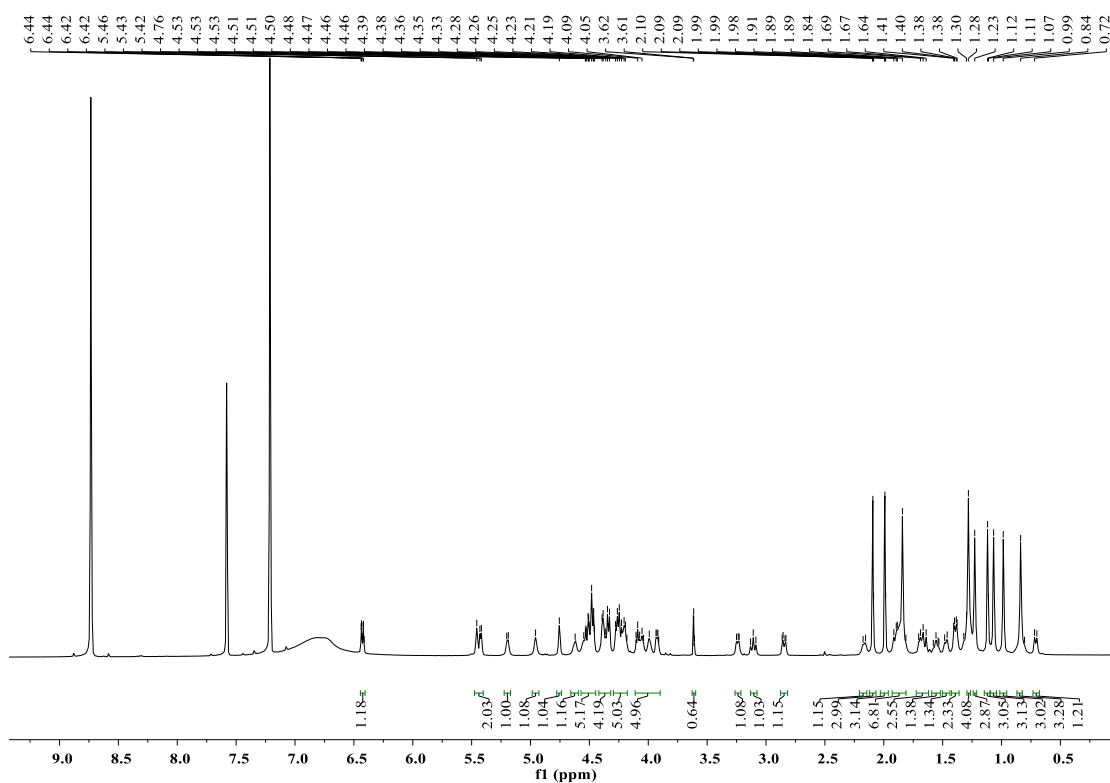

**S22.**  $^1\text{H}$  NMR Spectrum (600 MHz, Pyridine- $d_5$ ) of the new compound **4**

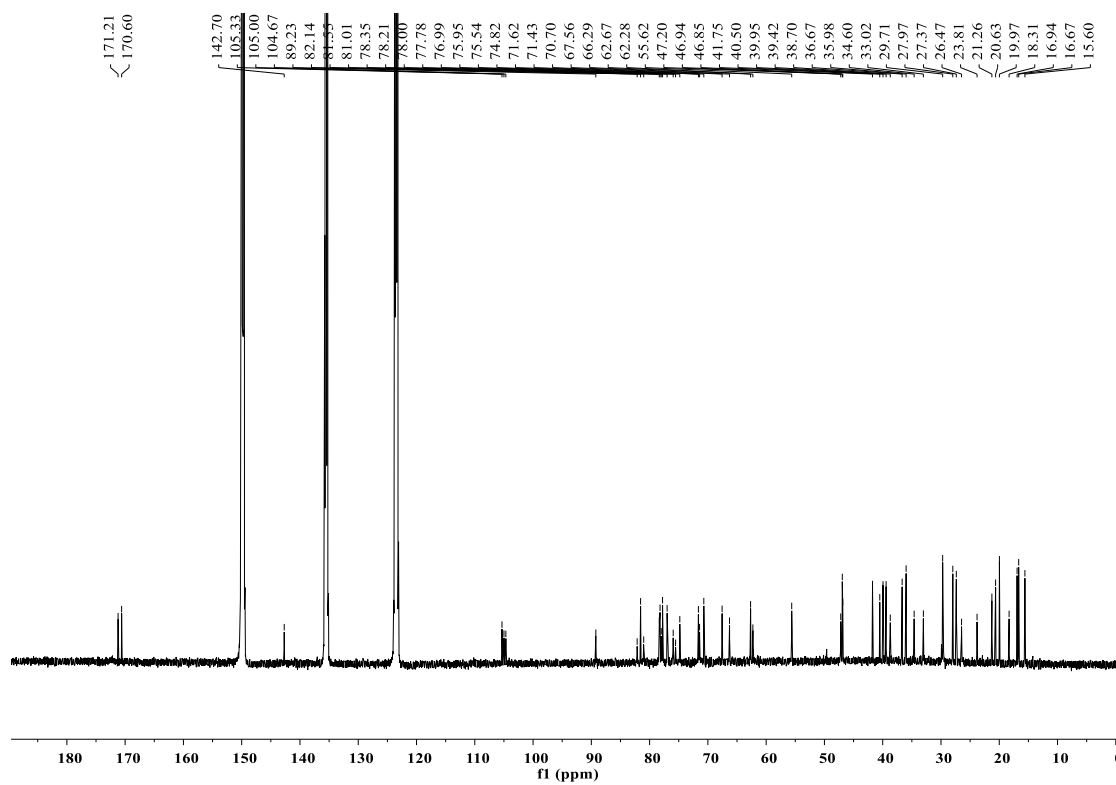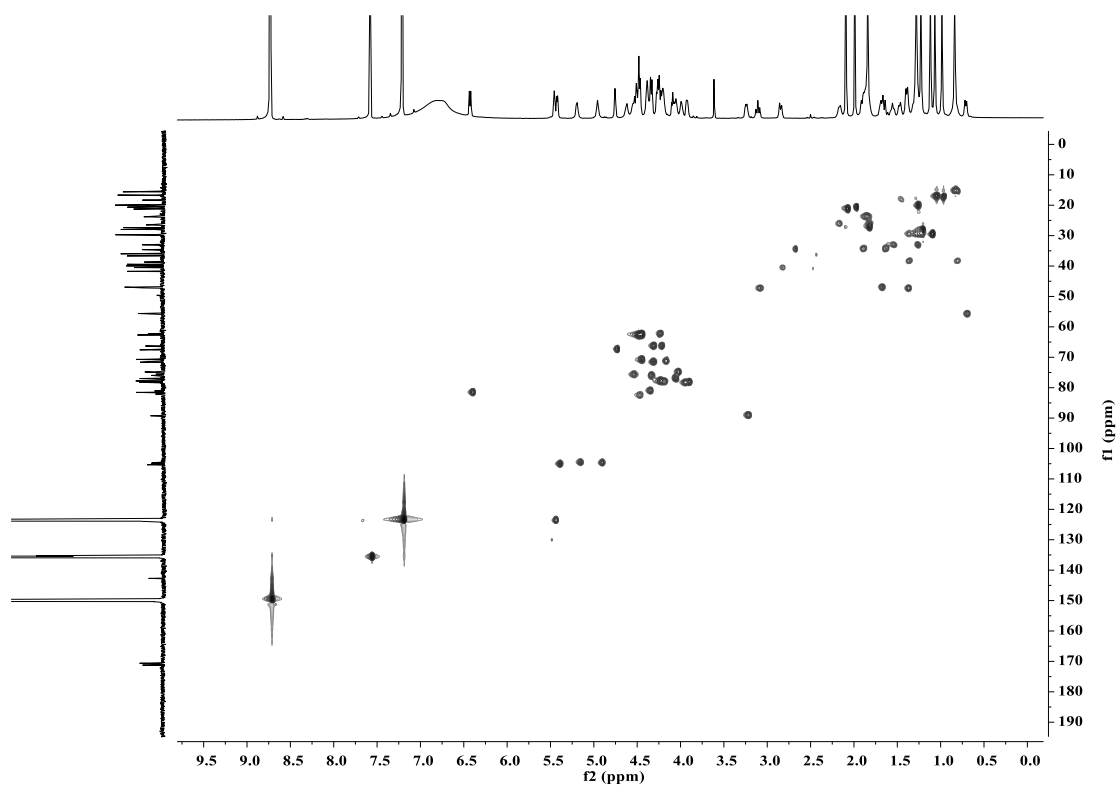

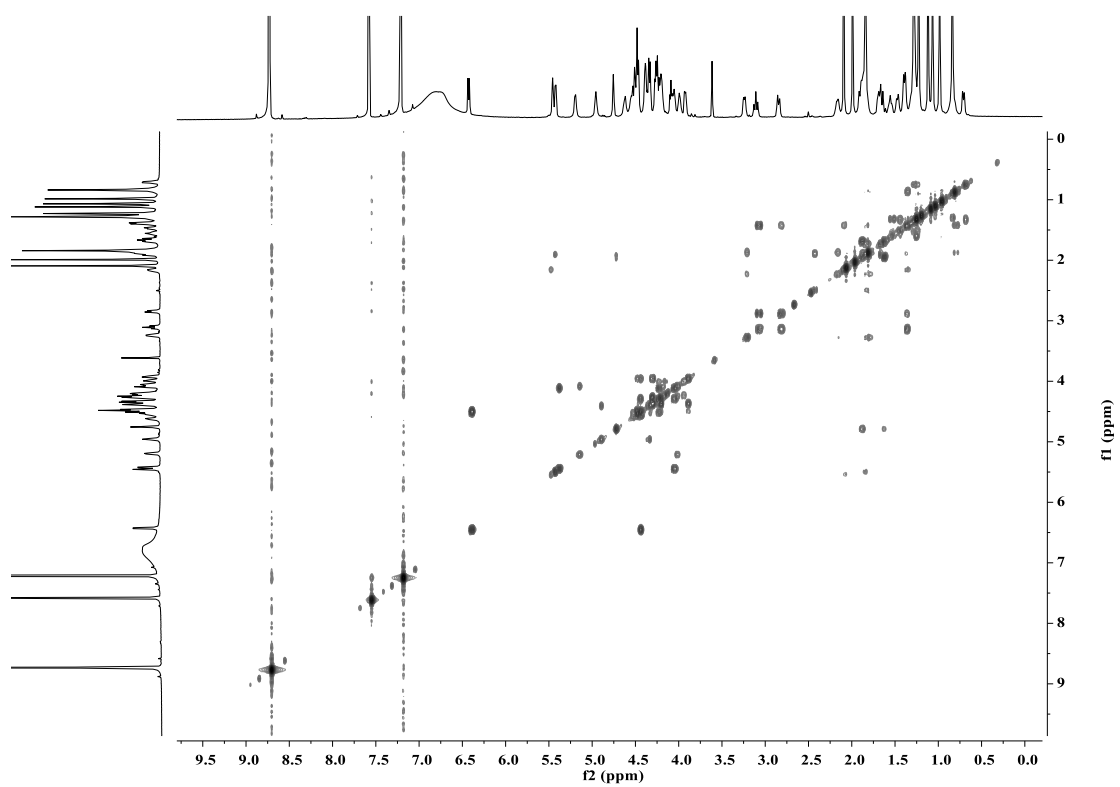

S25.  $^1\text{H}$ - $^1\text{H}$  COSY Spectrum of the new compound **4**

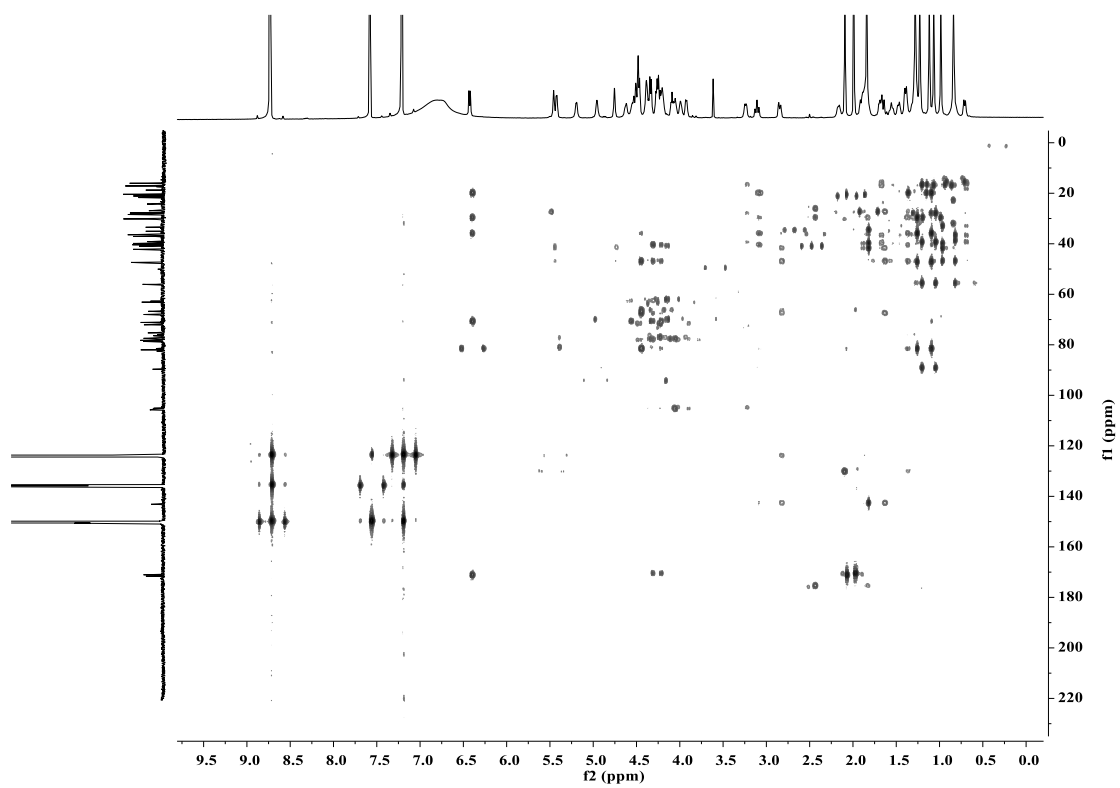

S26. HMBC Spectrum of the new compound **4**

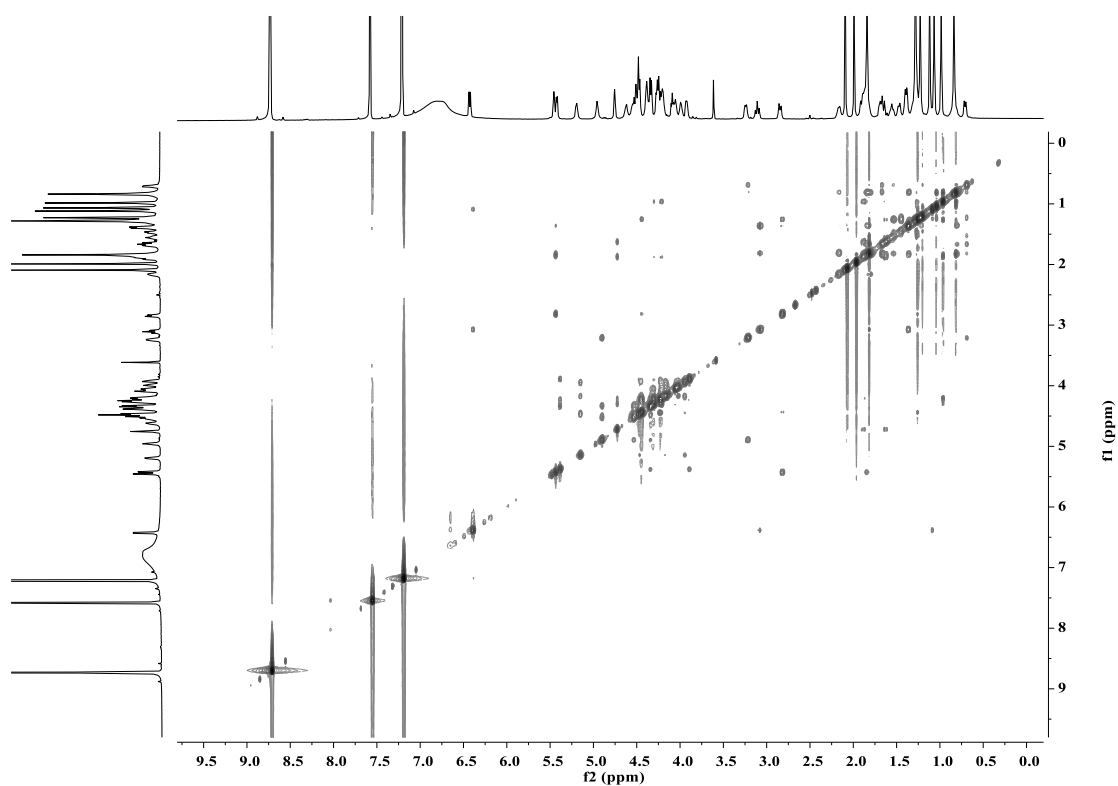S27. NOESY Spectrum of the new compound **4**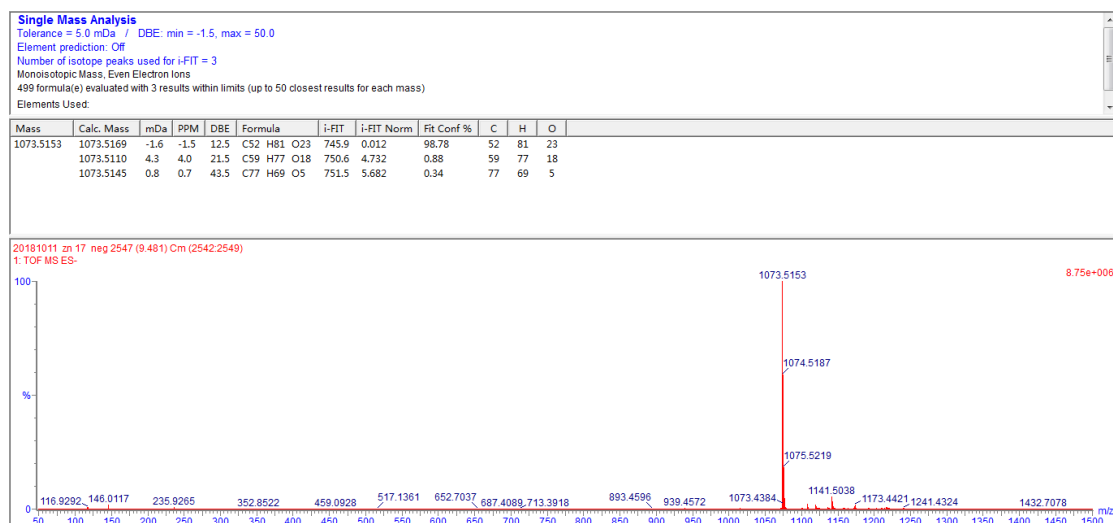S28. HRESIMS spectrum of the new compound **4**

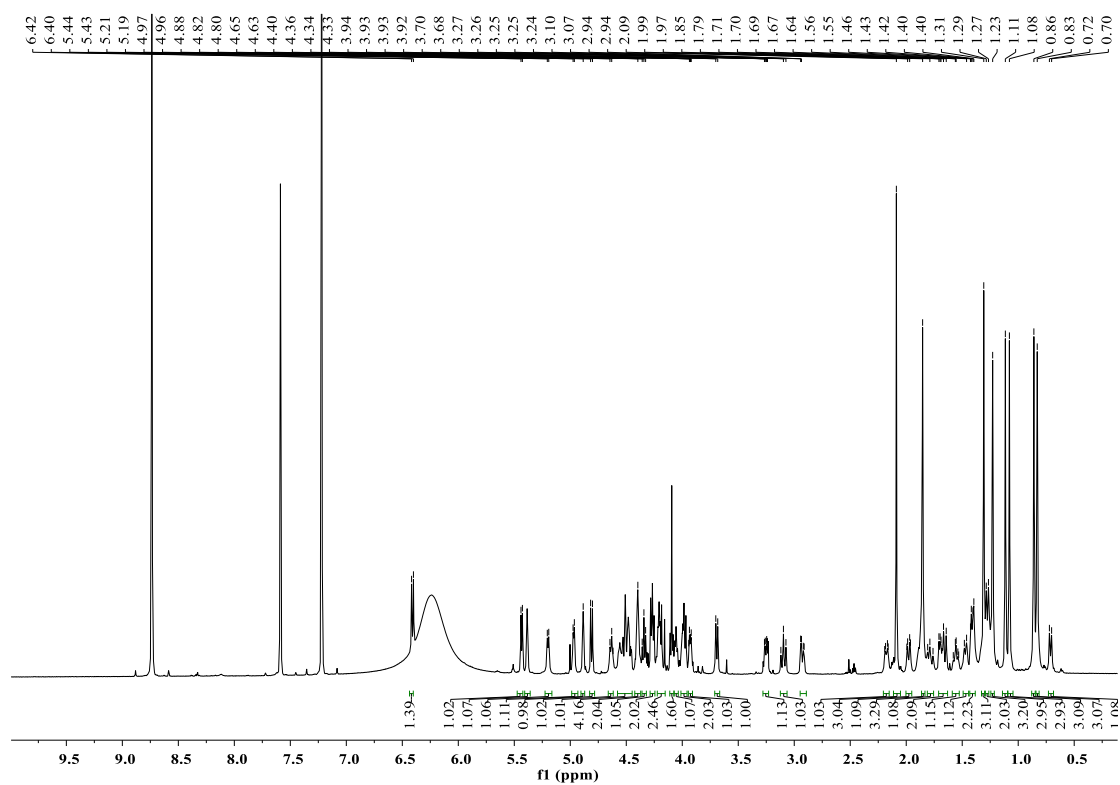

**S29.** <sup>1</sup>H NMR Spectrum (600 MHz, Pyridine-*d*<sub>5</sub>) of the new compound **5**

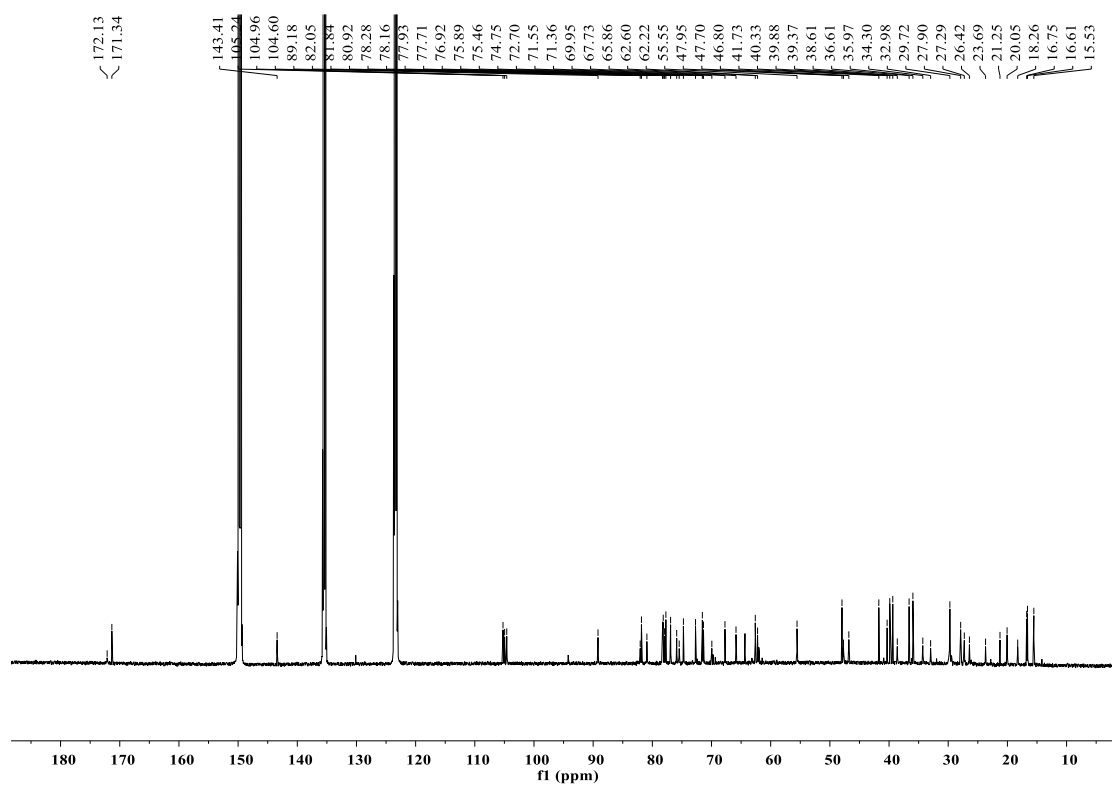

**S30.** <sup>13</sup>C NMR Spectrum (150 MHz, Pyridine-*d*<sub>5</sub>) of the new compound **5**

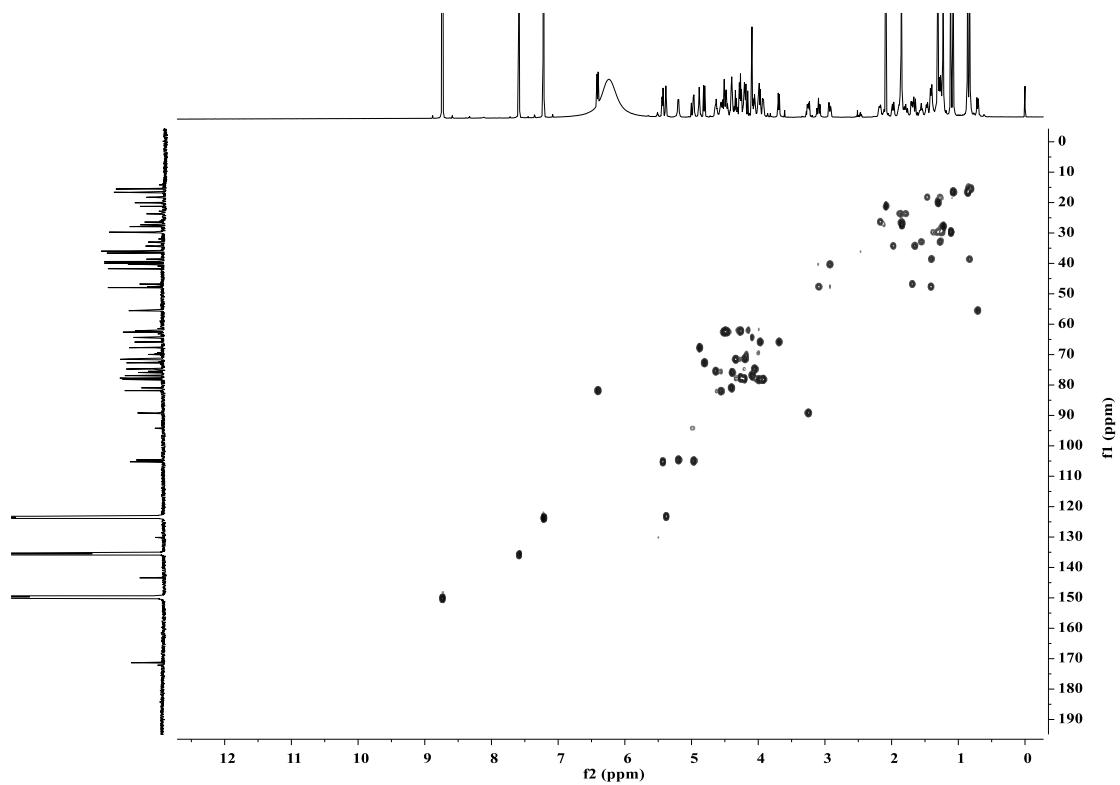

**S31.** HSQC Spectrum of the new compound **5**

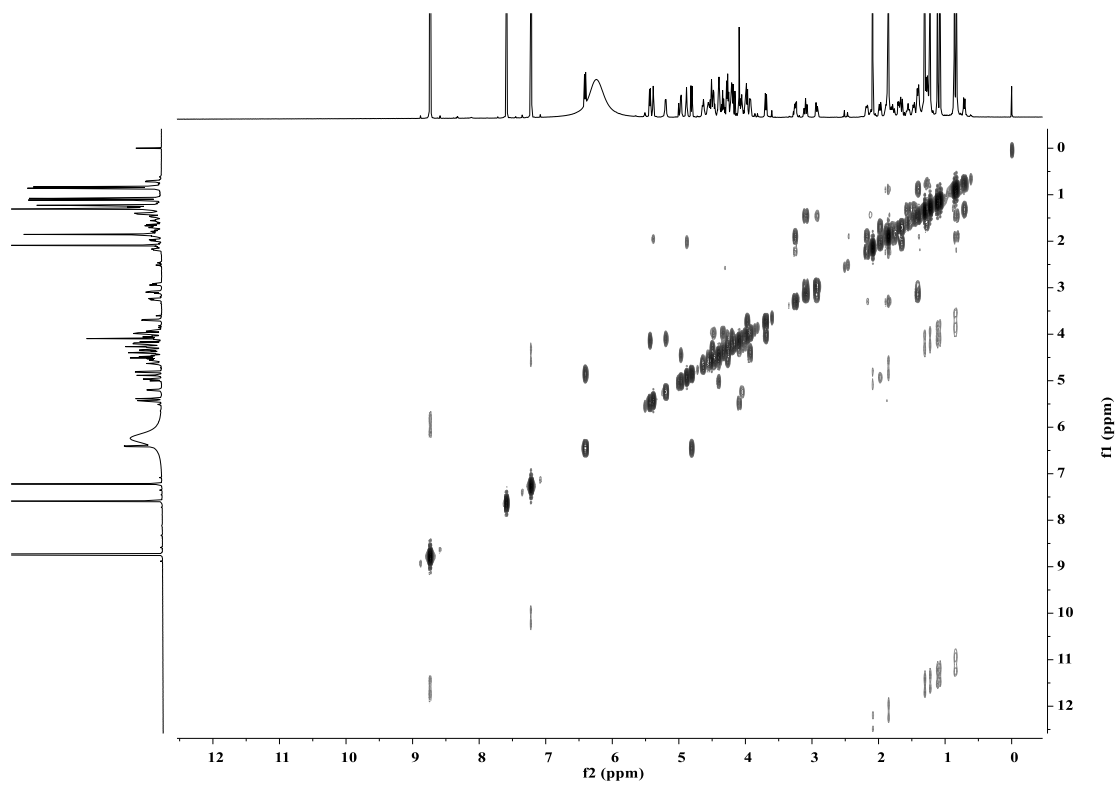

**S32.**  $^1\text{H}$ - $^1\text{H}$  COSY Spectrum of the new compound **5**



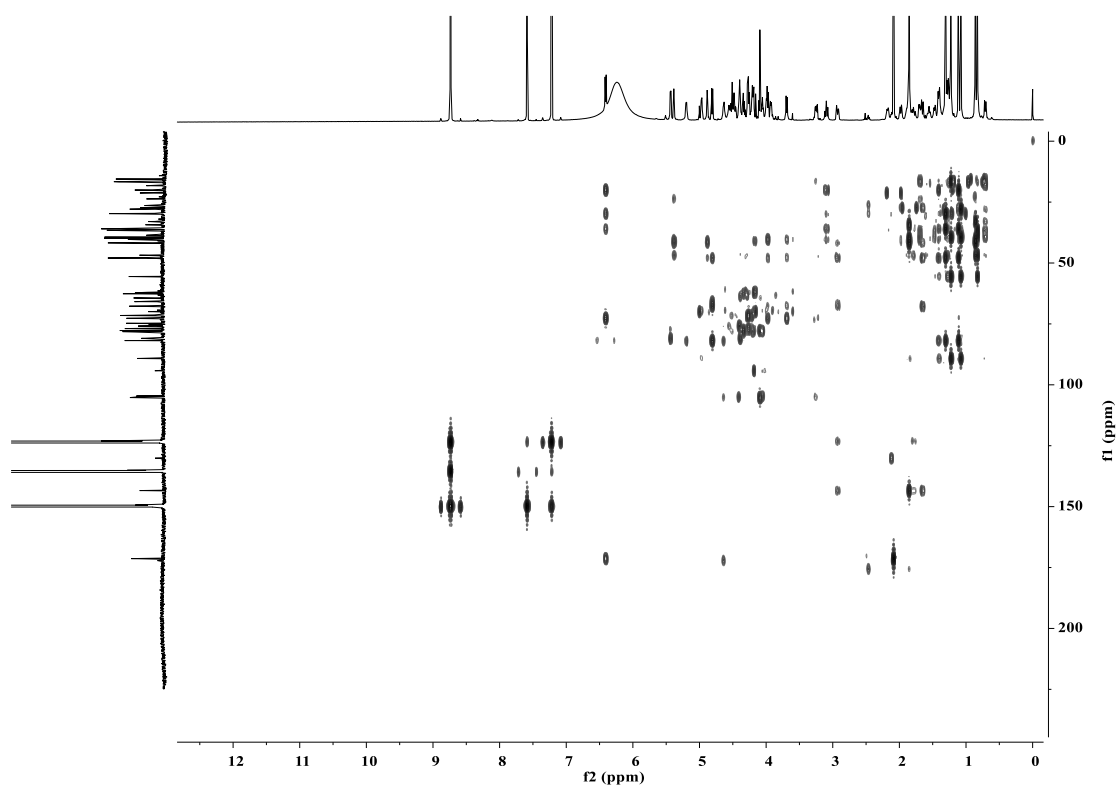

**S33.** HMBC Spectrum of the new compound **5**

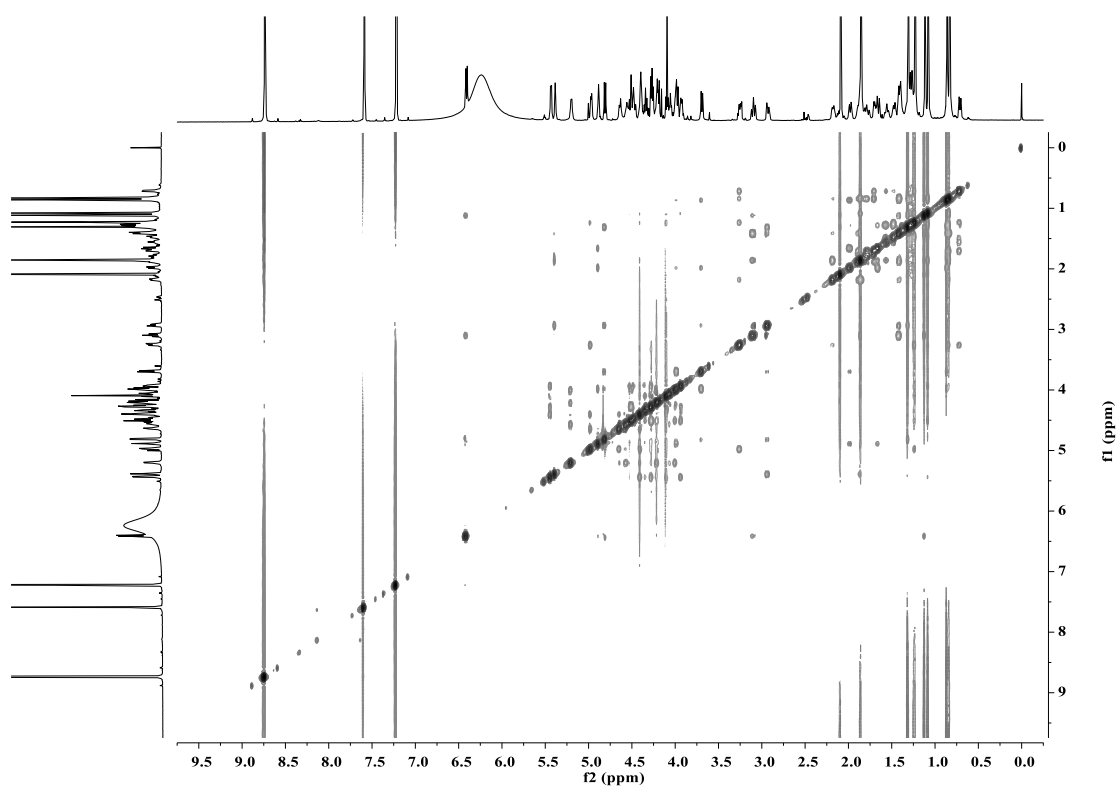

**S34.** NOESY Spectrum of the new compound **5**

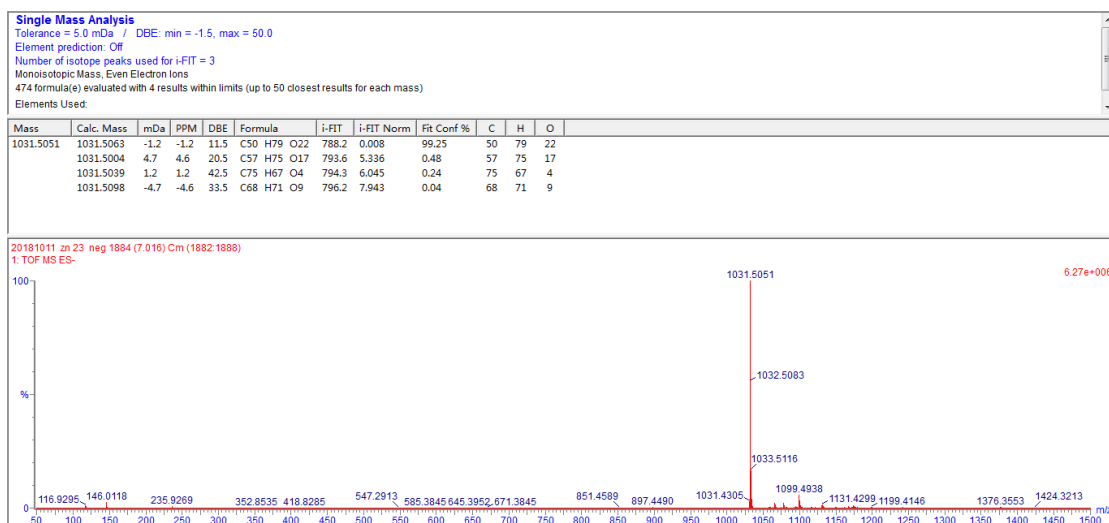

### S35. HRESIMS spectrum of the new compound **5**

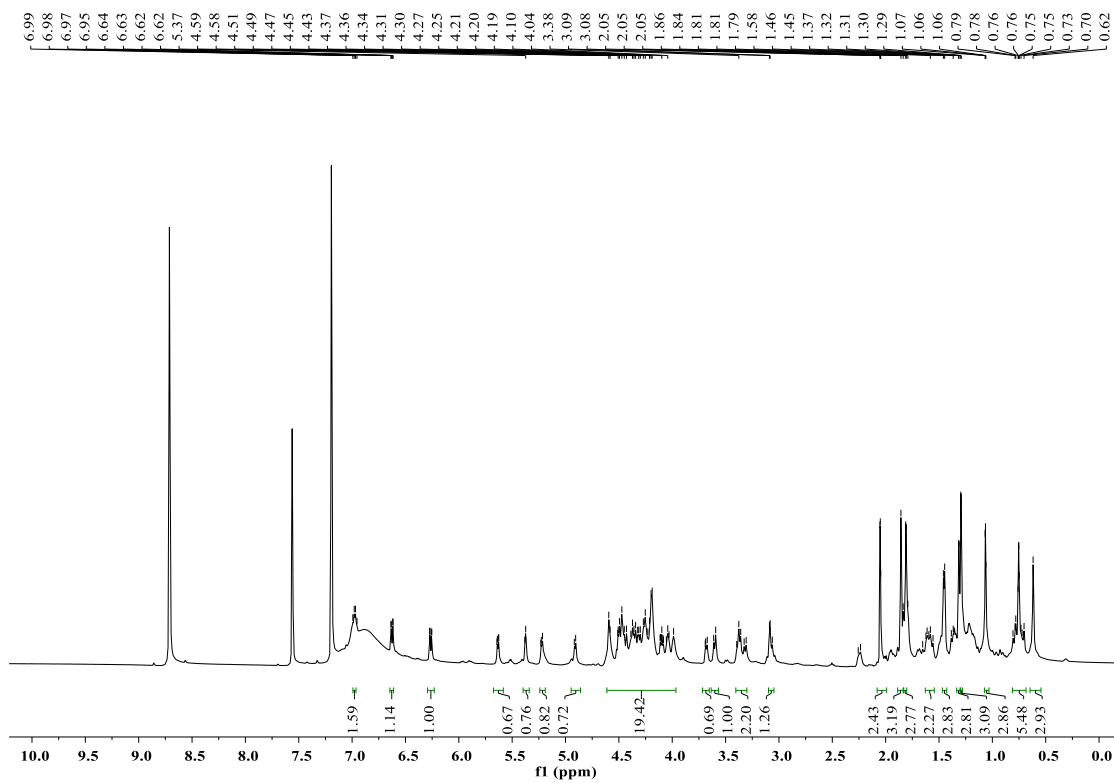

### S36. <sup>1</sup>H NMR Spectrum (600 MHz, Pyridine-*d*<sub>5</sub>) of the new compound **6**

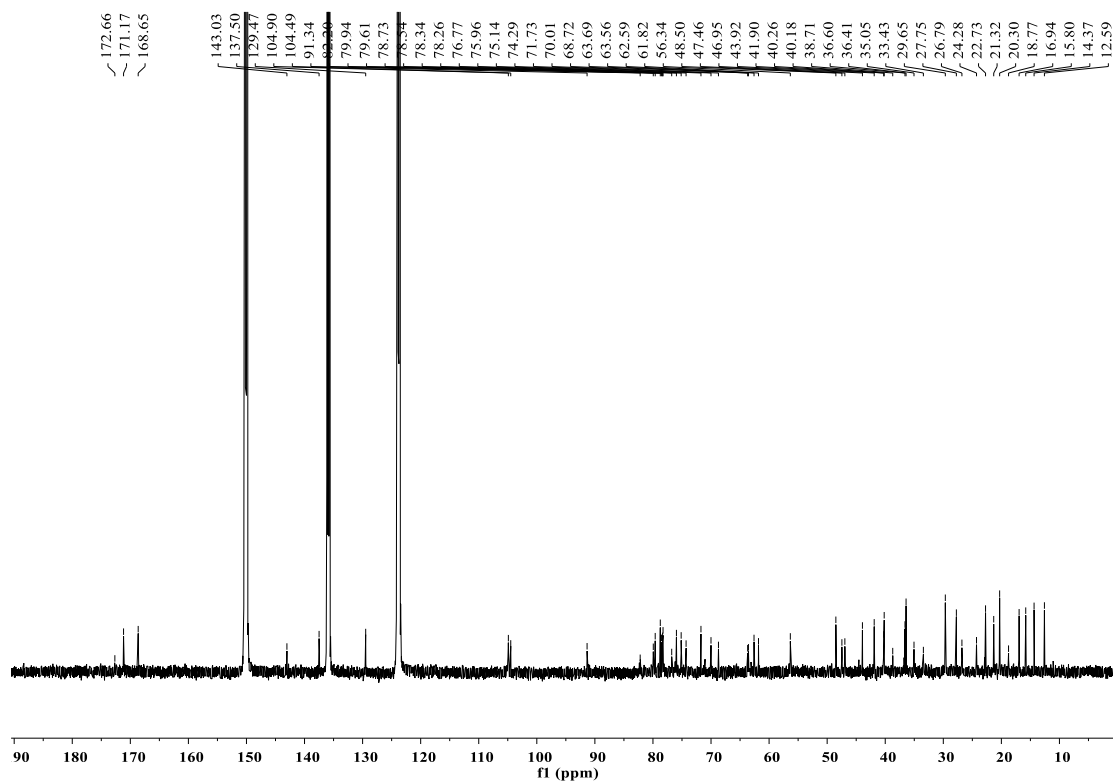

S37.  $^{13}\text{C}$  NMR Spectrum (150 MHz, Pyridine- $d_5$ ) of the new compound **6**

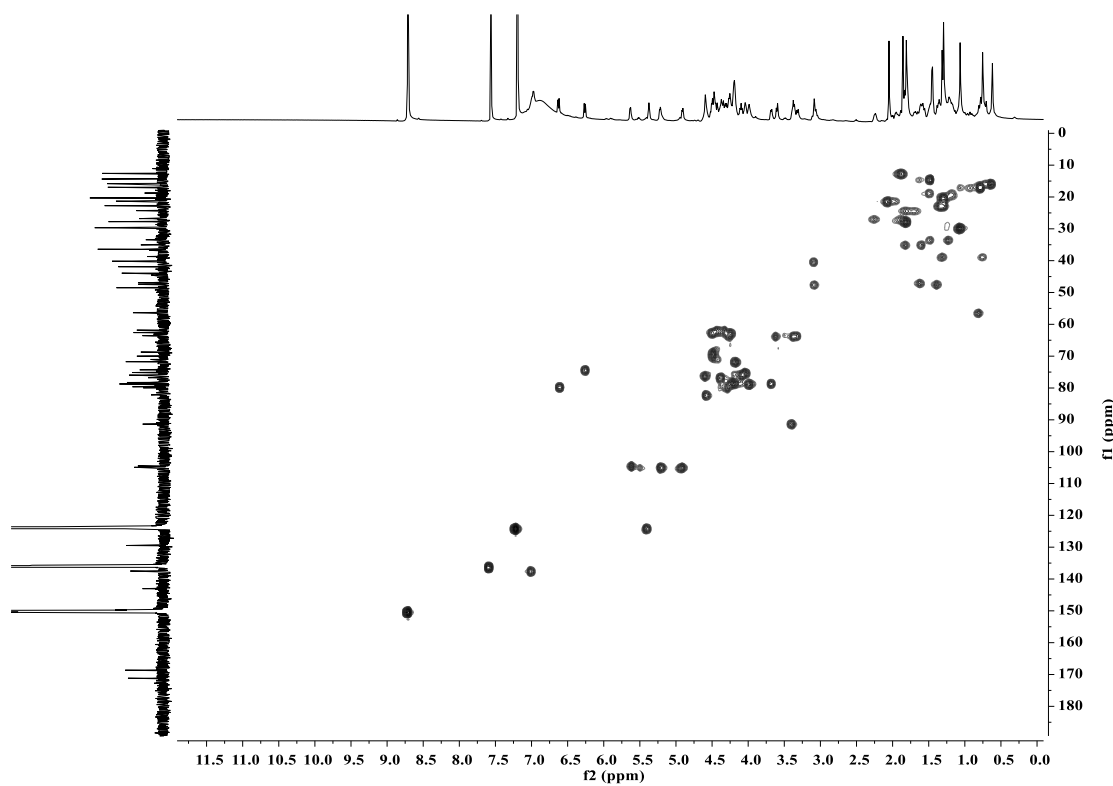

S38. HSQC Spectrum of the new compound **6**

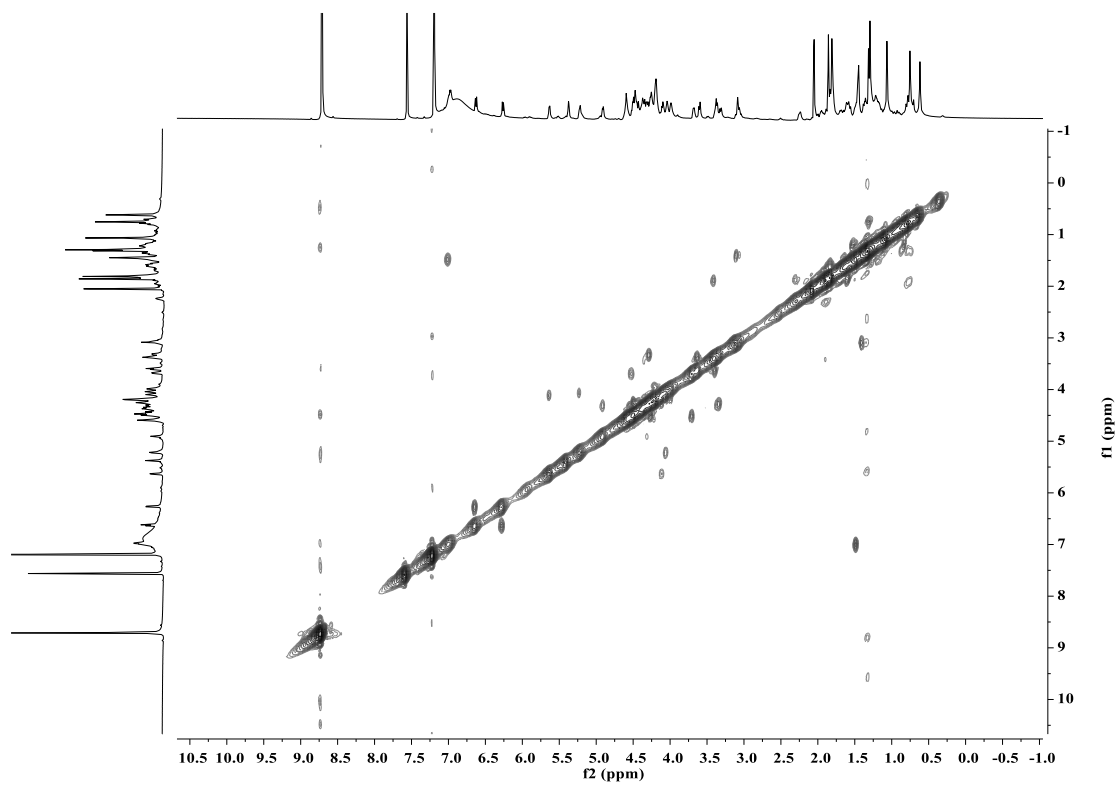

**S39.**  $^1\text{H}$ - $^1\text{H}$  COSY Spectrum of the new compound **6**

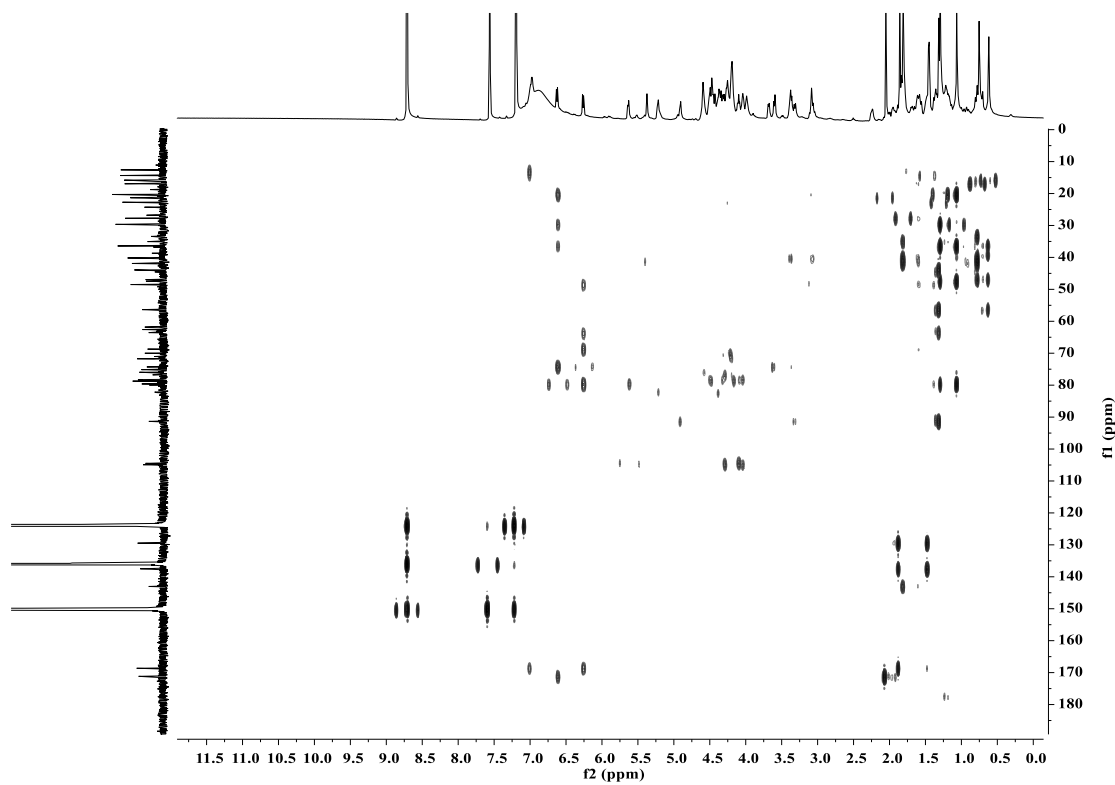

**S40.** HMBC Spectrum of the new compound **6**

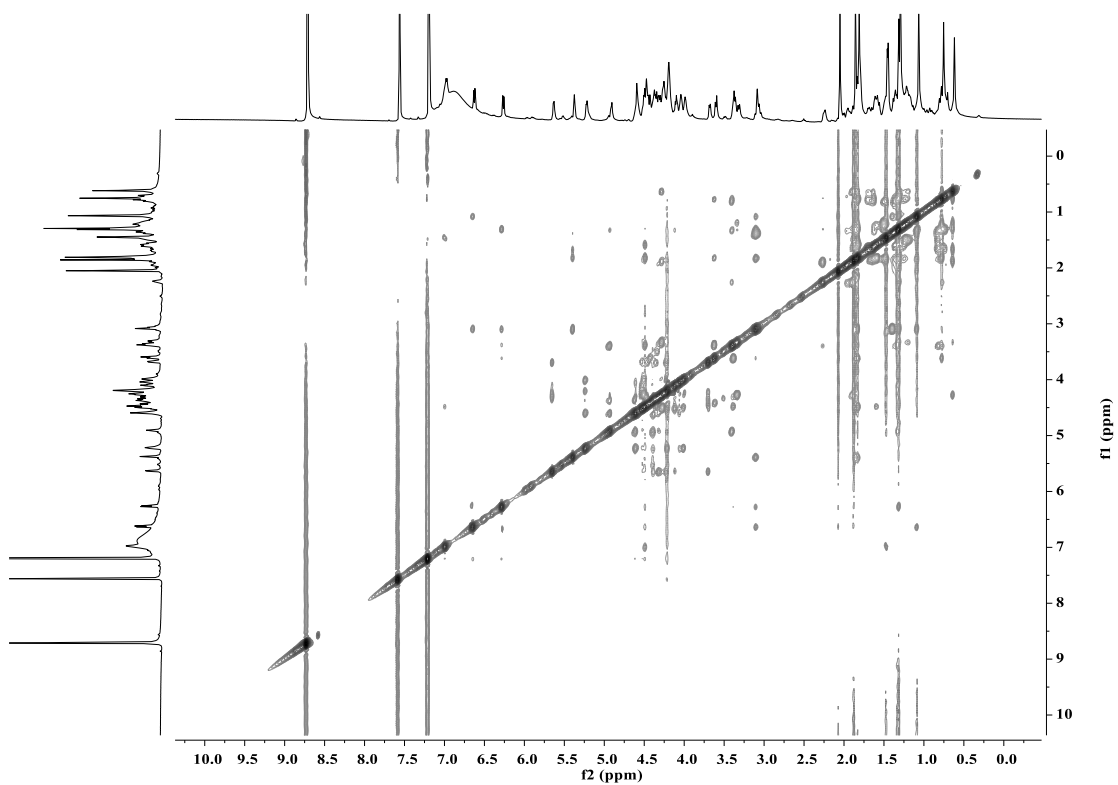

**S41.** NOESY Spectrum of the new compound **6**

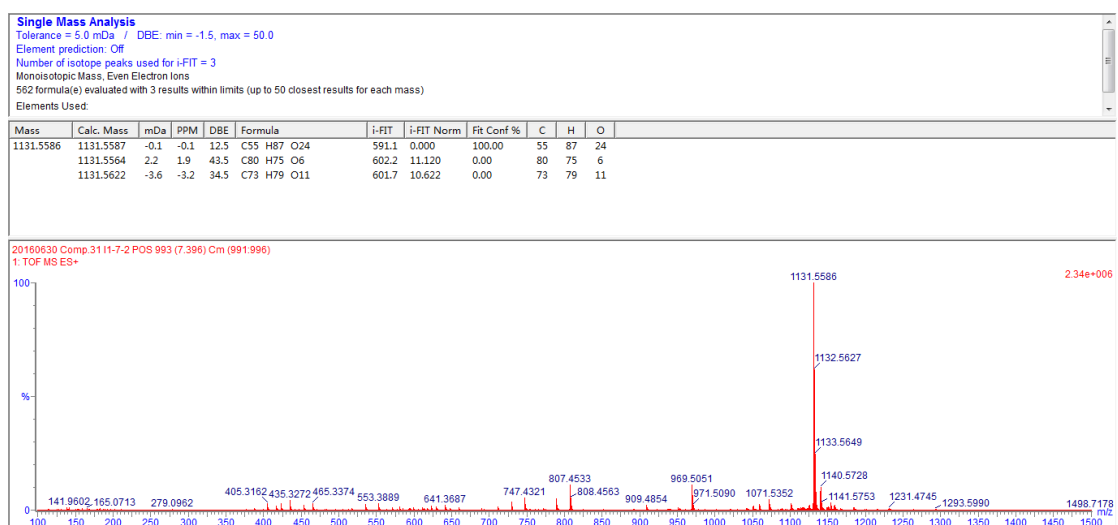

**S42.** HRESIMS spectrum of the new compound **6**

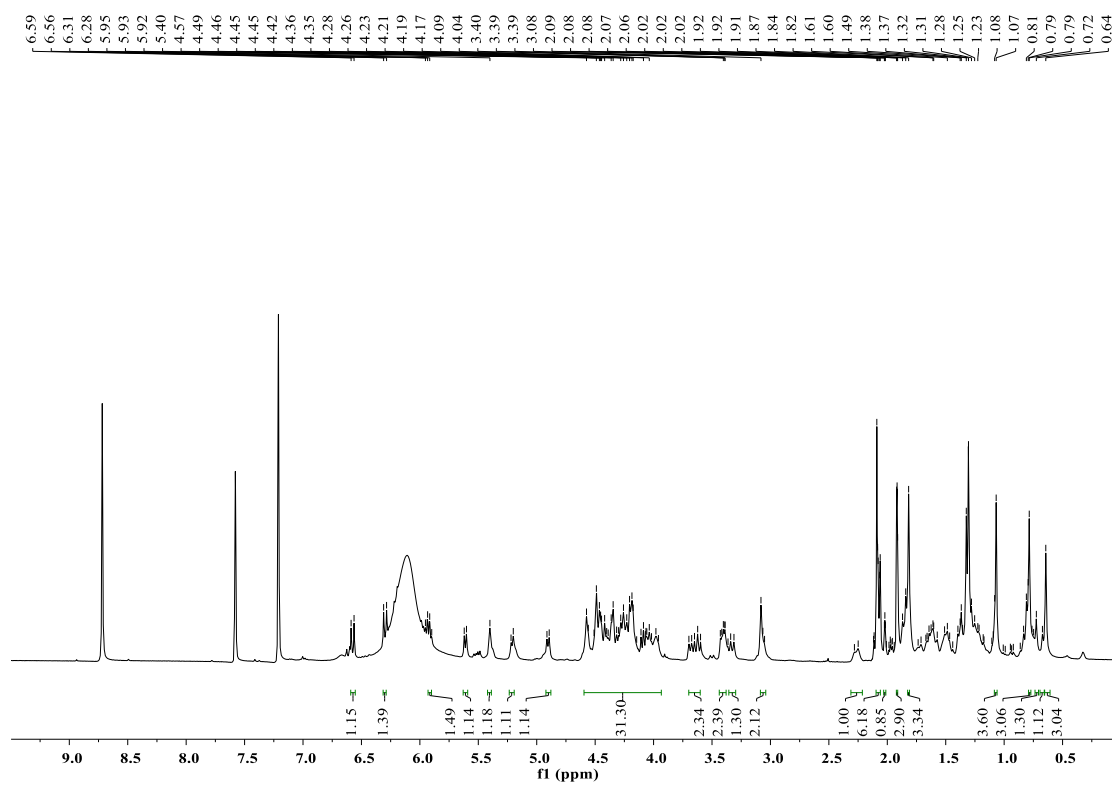

**S43.** <sup>1</sup>H NMR Spectrum (600 MHz, Pyridine-*d*<sub>5</sub>) of the new compound **7**

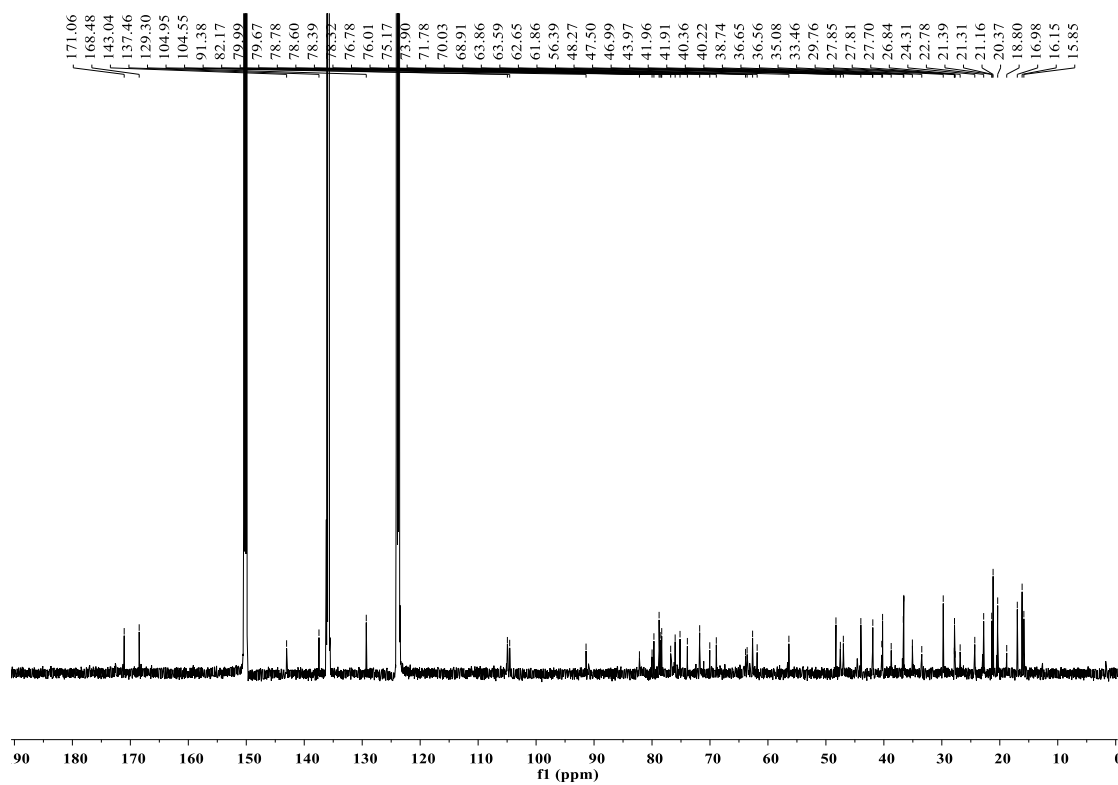

**S44.** <sup>13</sup>C NMR Spectrum (150 MHz, Pyridine-*d*<sub>5</sub>) of the new compound **7**

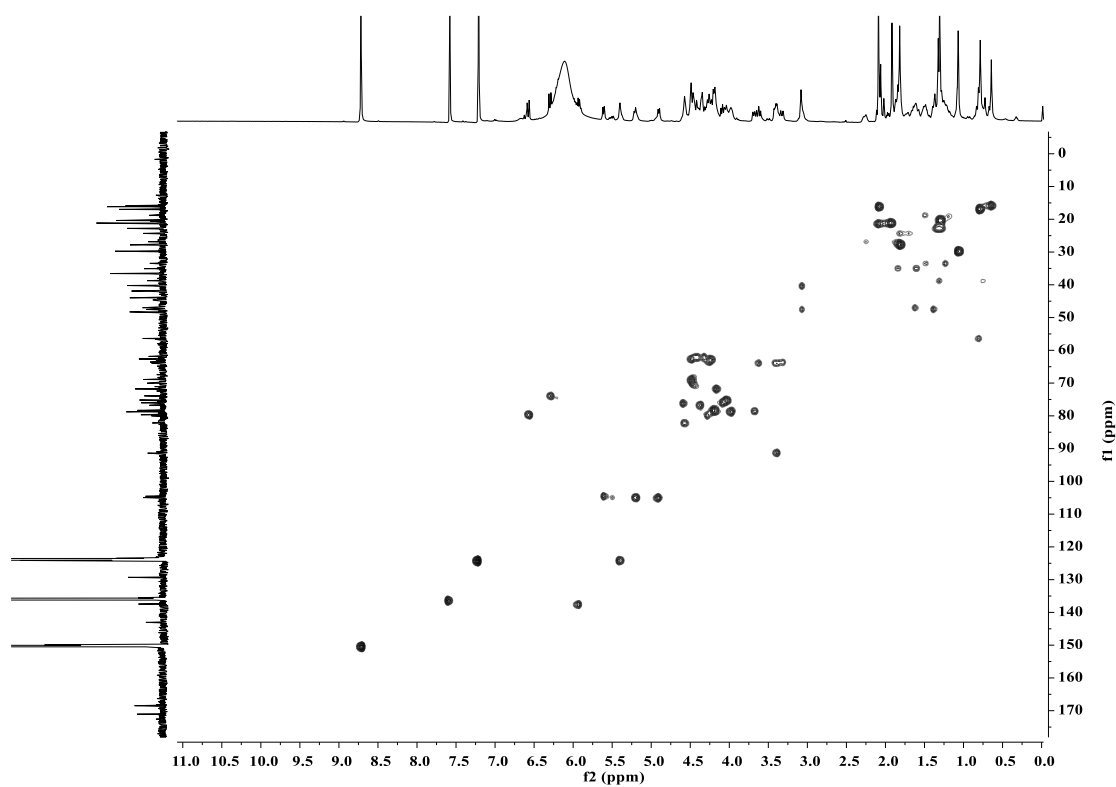

**S45.** HSQC Spectrum of the new compound **7**

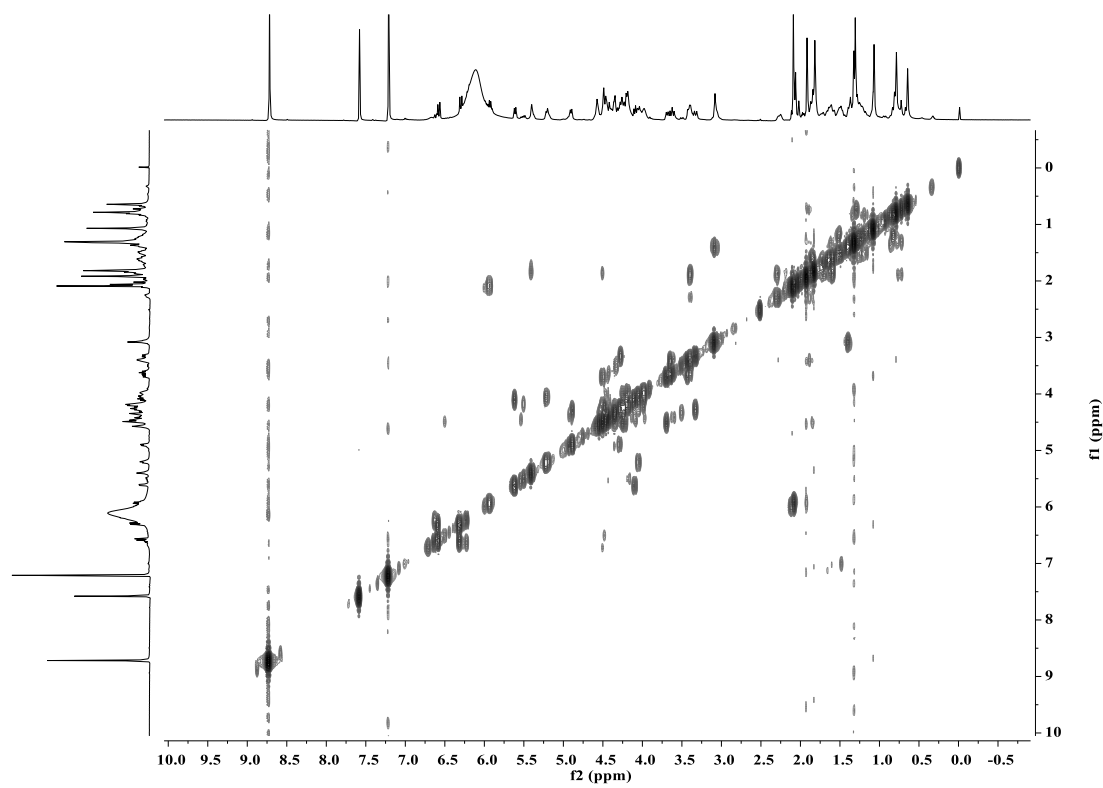

**S46.**  $^1\text{H}$ - $^1\text{H}$  COSY Spectrum of the new compound **7**

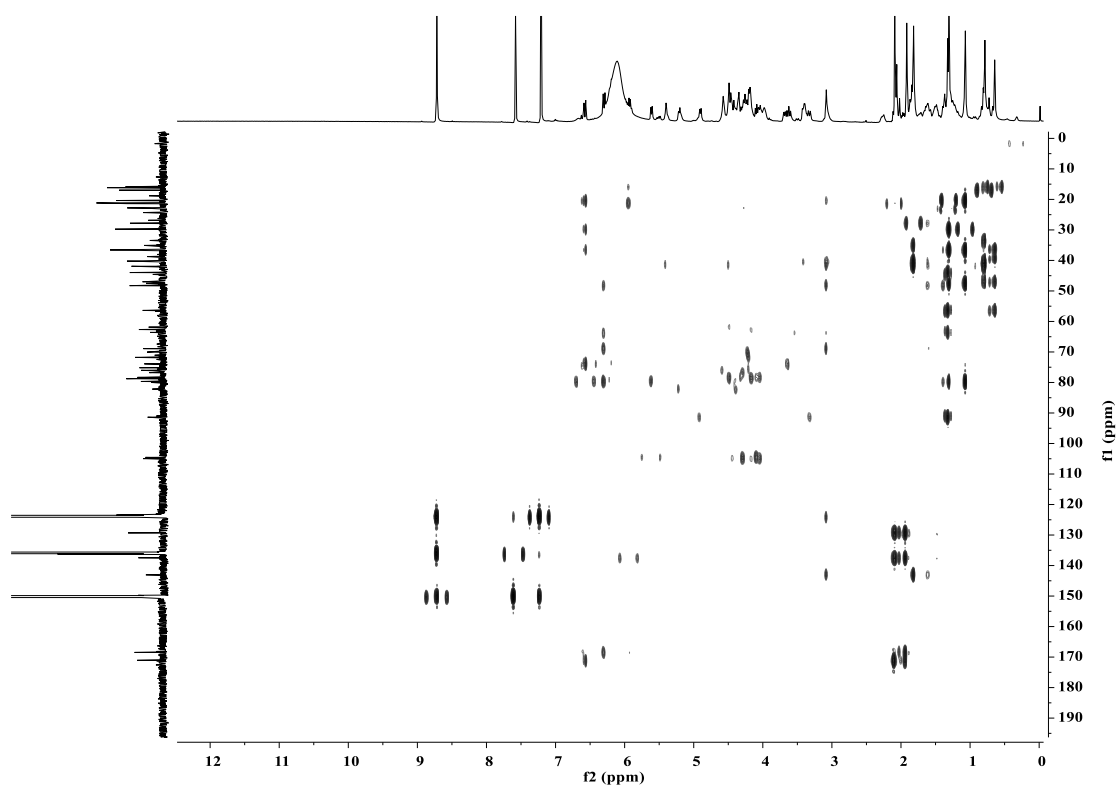

S47. HMBC Spectrum of the new compound **7**

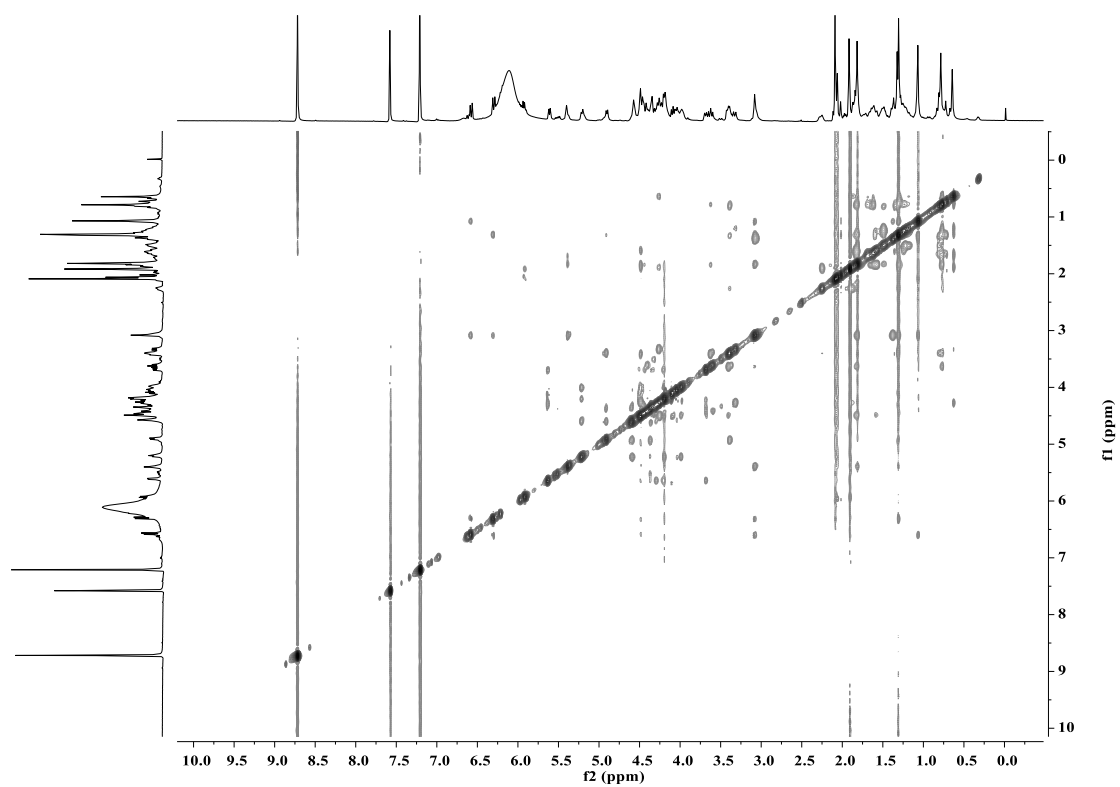

S48. NOESY Spectrum of the new compound **7**



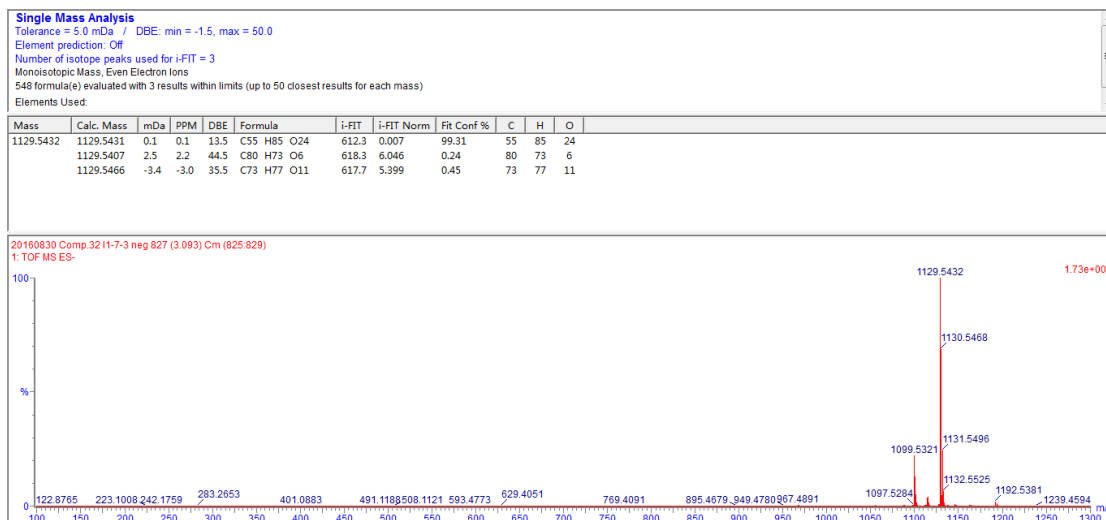

**S49.** HRESIMS spectrum of the new compound **7**

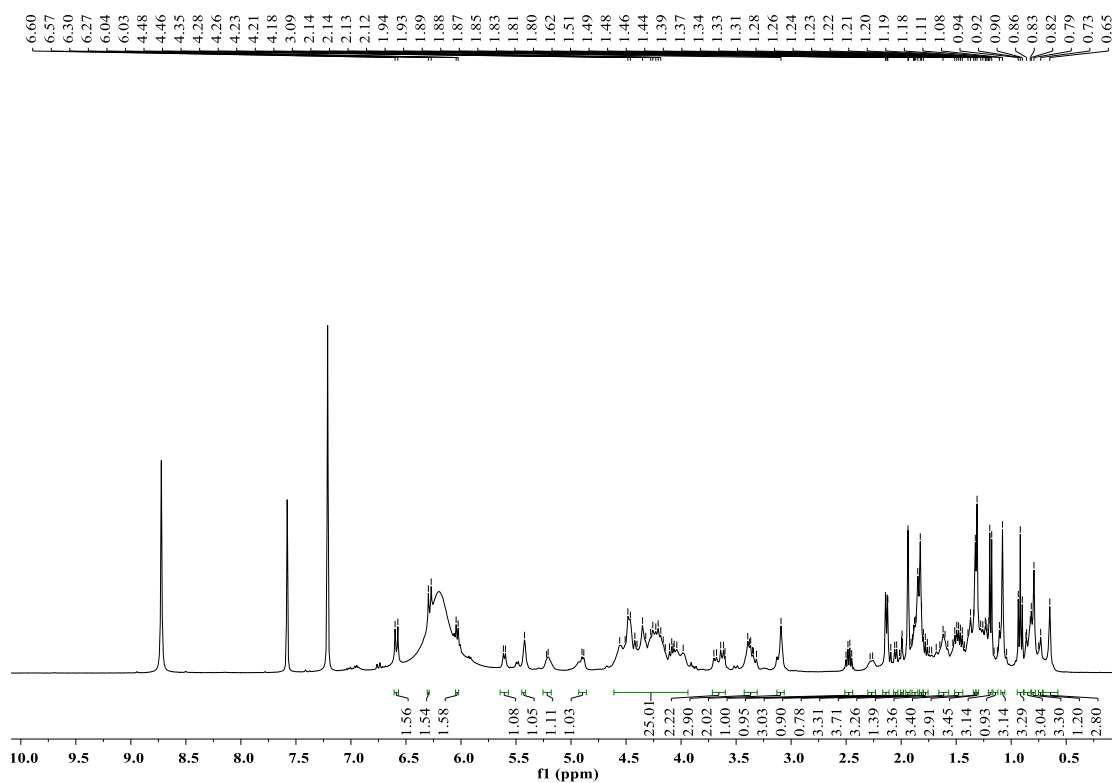

**S50.** <sup>1</sup>H NMR Spectrum (600 MHz, Pyridine-*d*<sub>5</sub>) of the new compound **8**

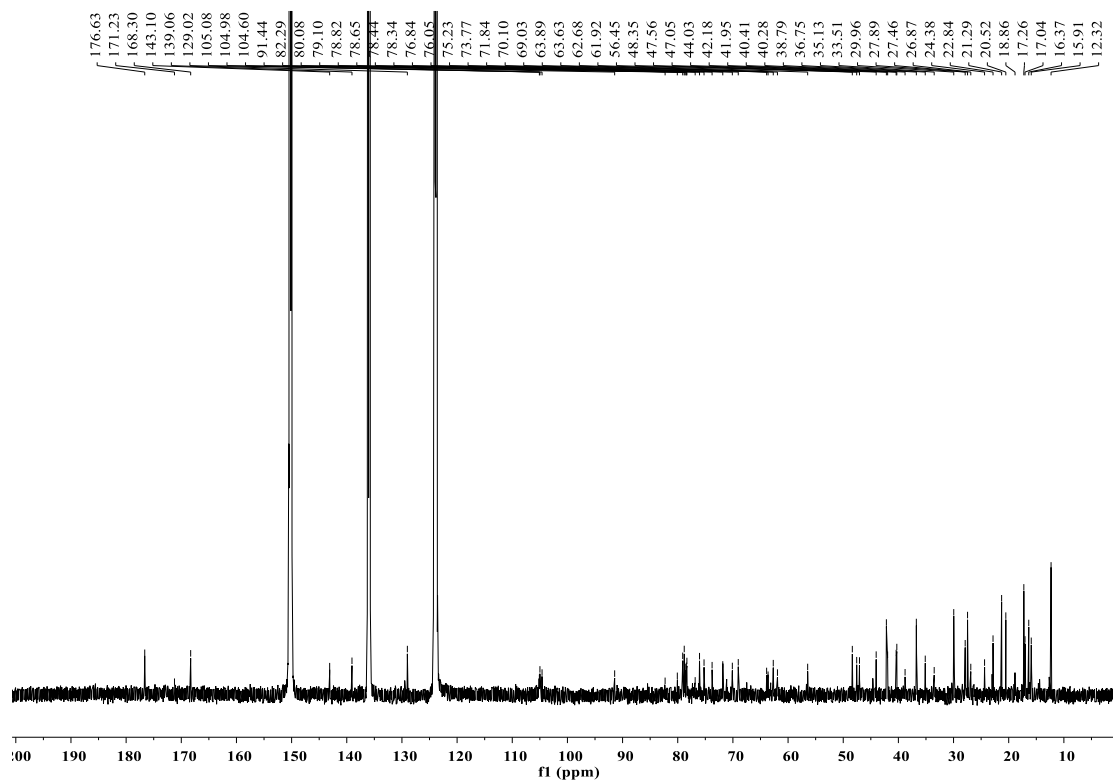

S51.  $^{13}\text{C}$  NMR Spectrum (150 MHz, Pyridine- $d_5$ ) of the new compound **8**

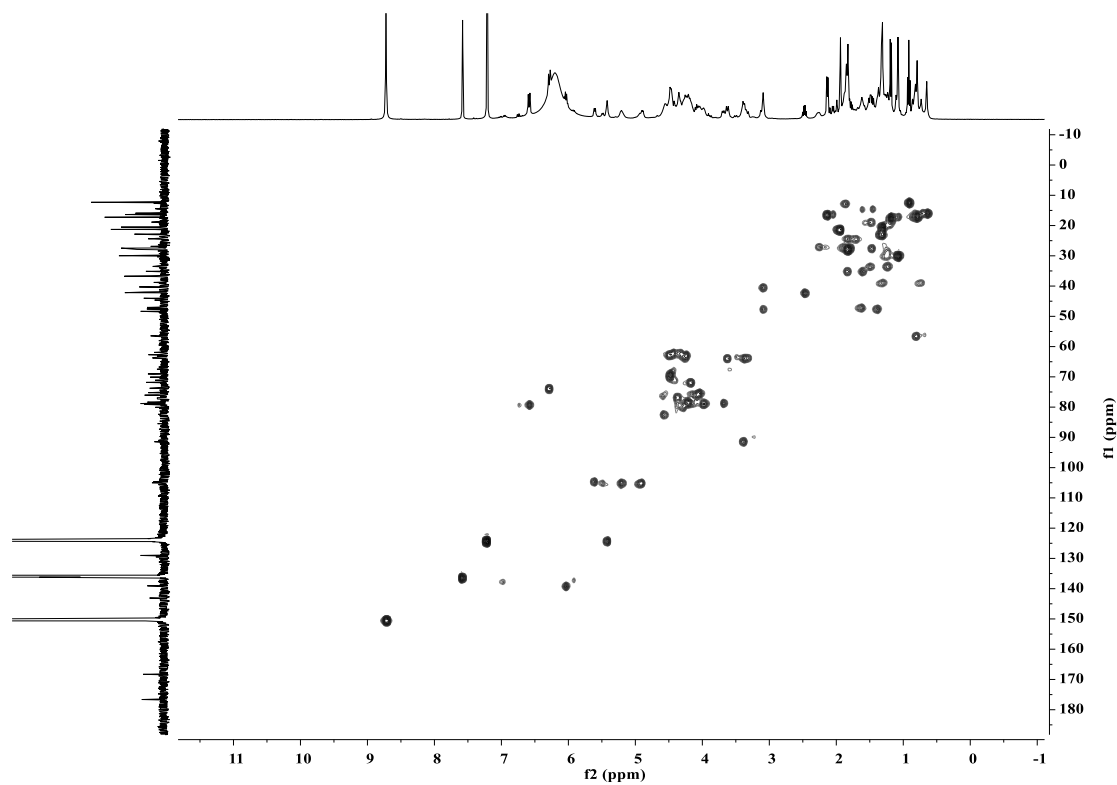

S52. HSQC Spectrum of the new compound **8**

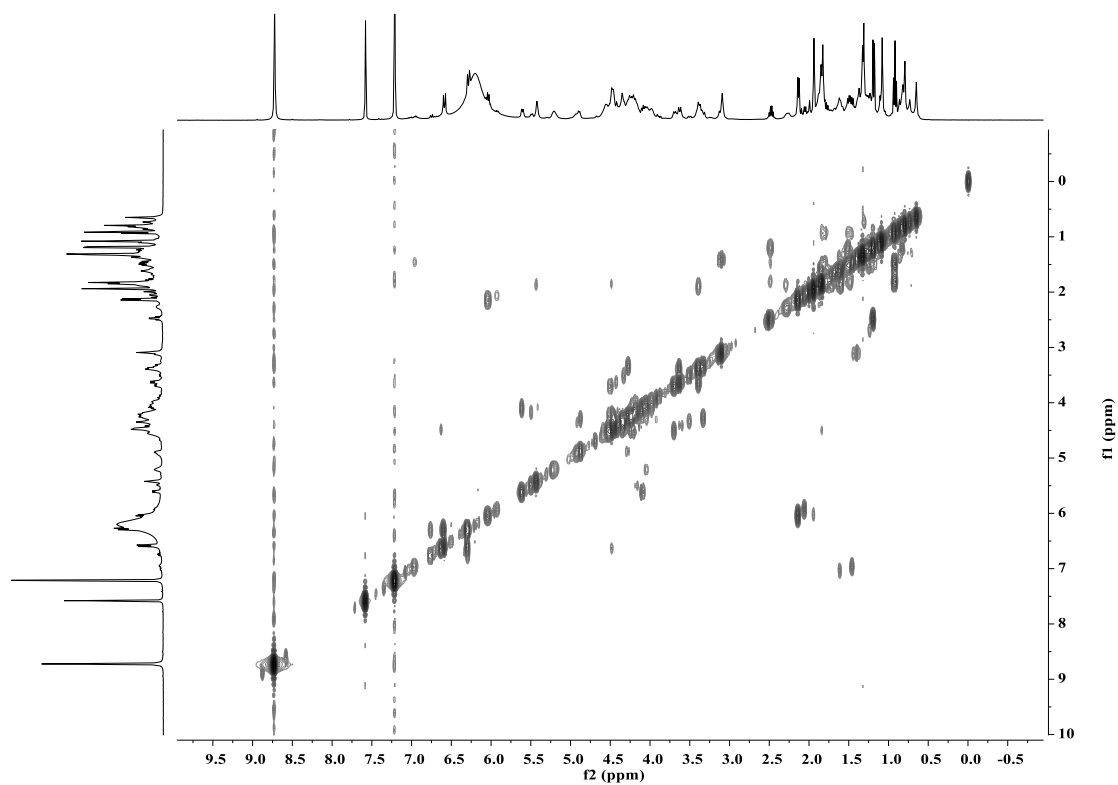

**S53.**  $^1\text{H}$ - $^1\text{H}$  COSY Spectrum of the new compound **8**

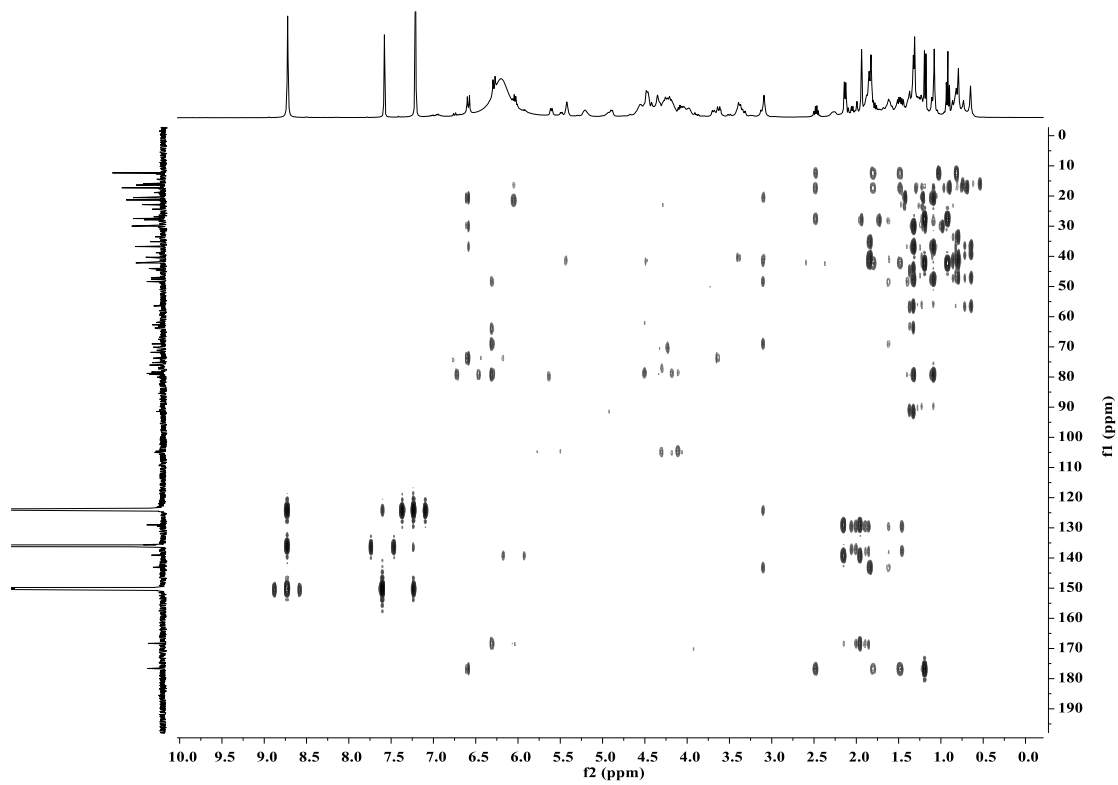

**S54.** HMBC Spectrum of the new compound **8**

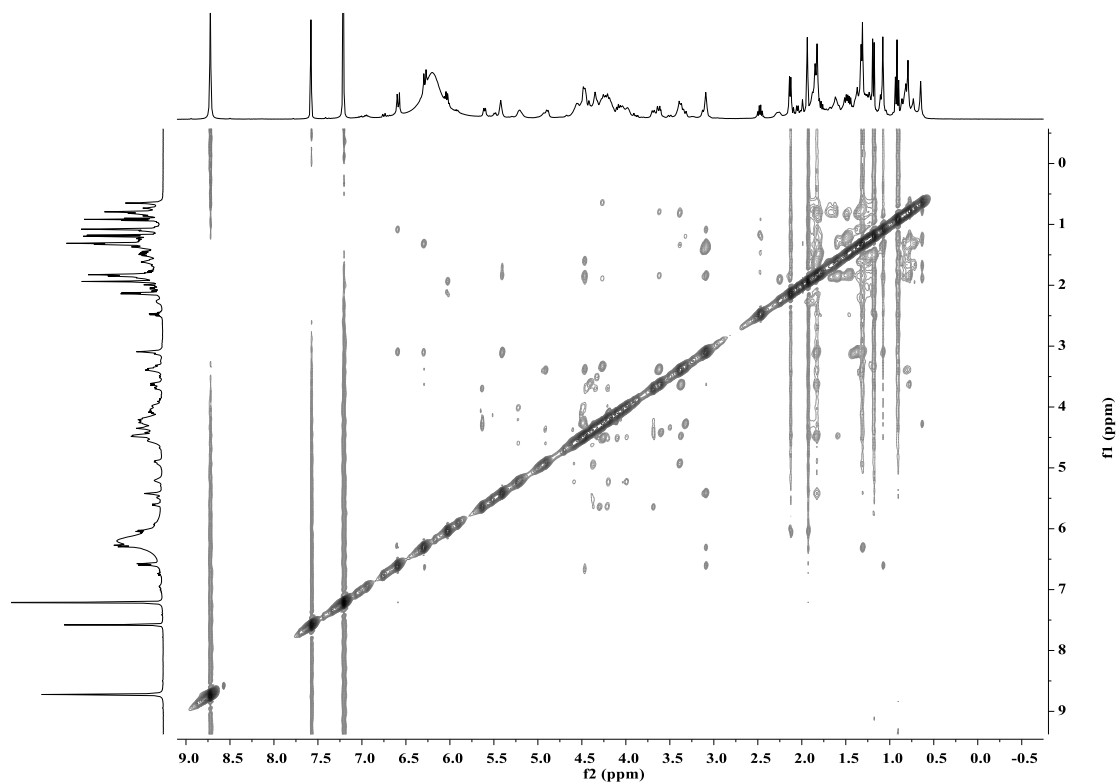S55. NOESY Spectrum of the new compound **8**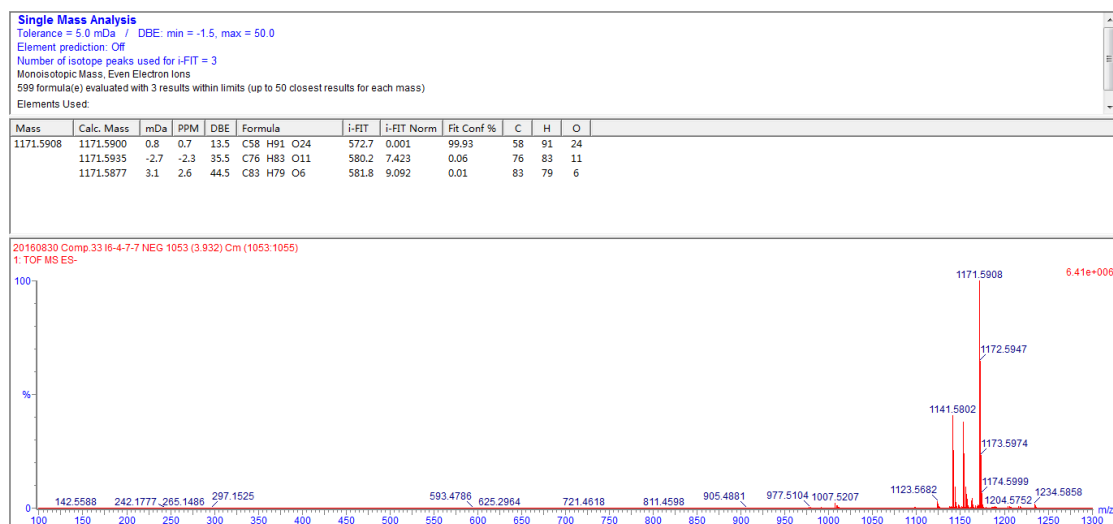S56. HRESIMS spectrum of the new compound **8**

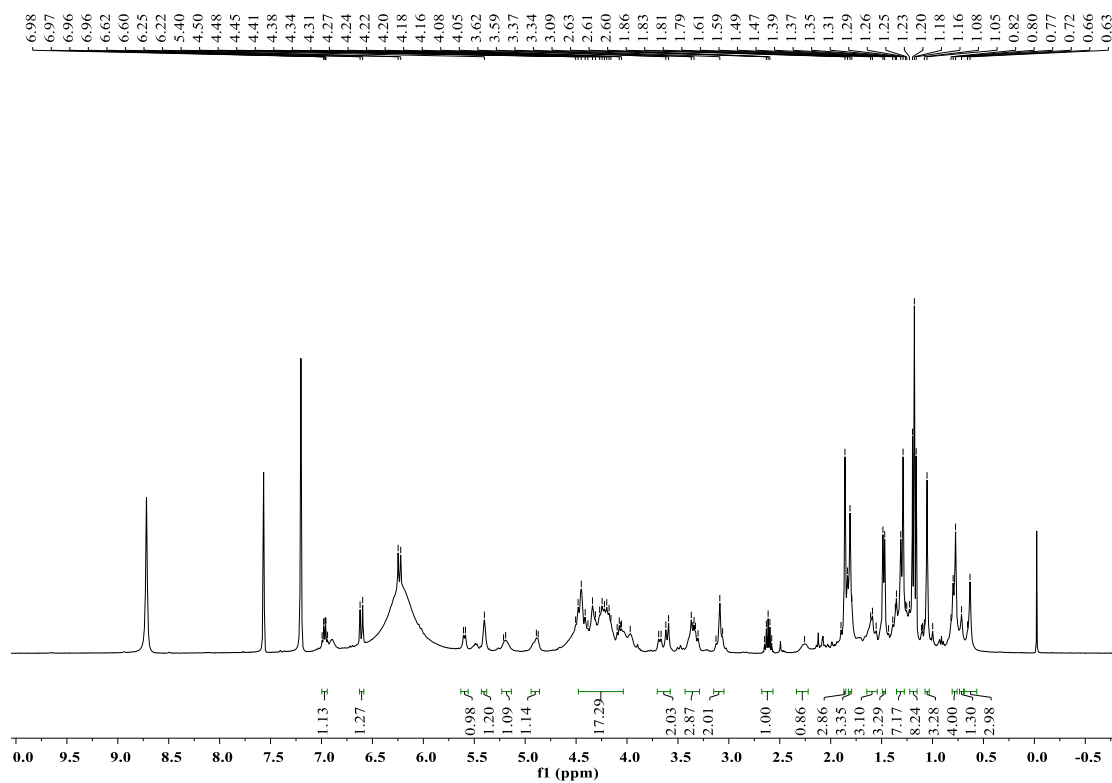

**S57.** <sup>1</sup>H NMR Spectrum (600 MHz, Pyridine-*d*<sub>5</sub>) of the new compound **9**

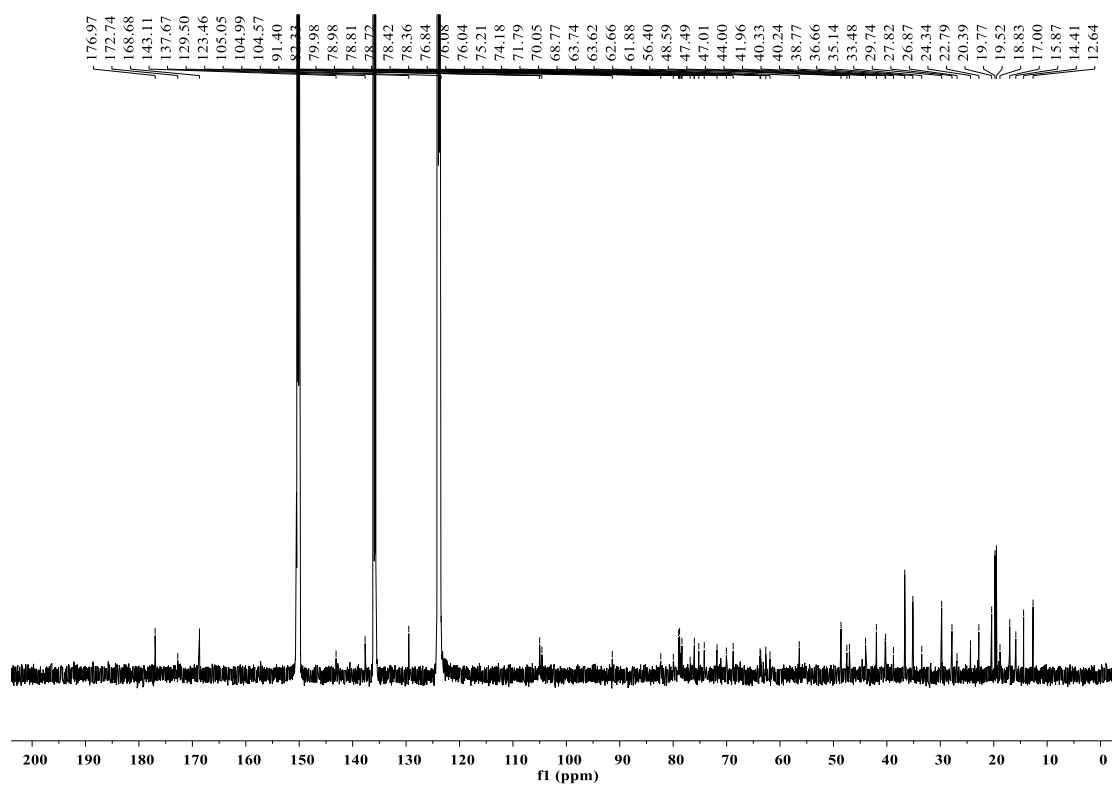

**S58.** <sup>13</sup>C NMR Spectrum (150 MHz, Pyridine-*d*<sub>5</sub>) of the new compound **9**

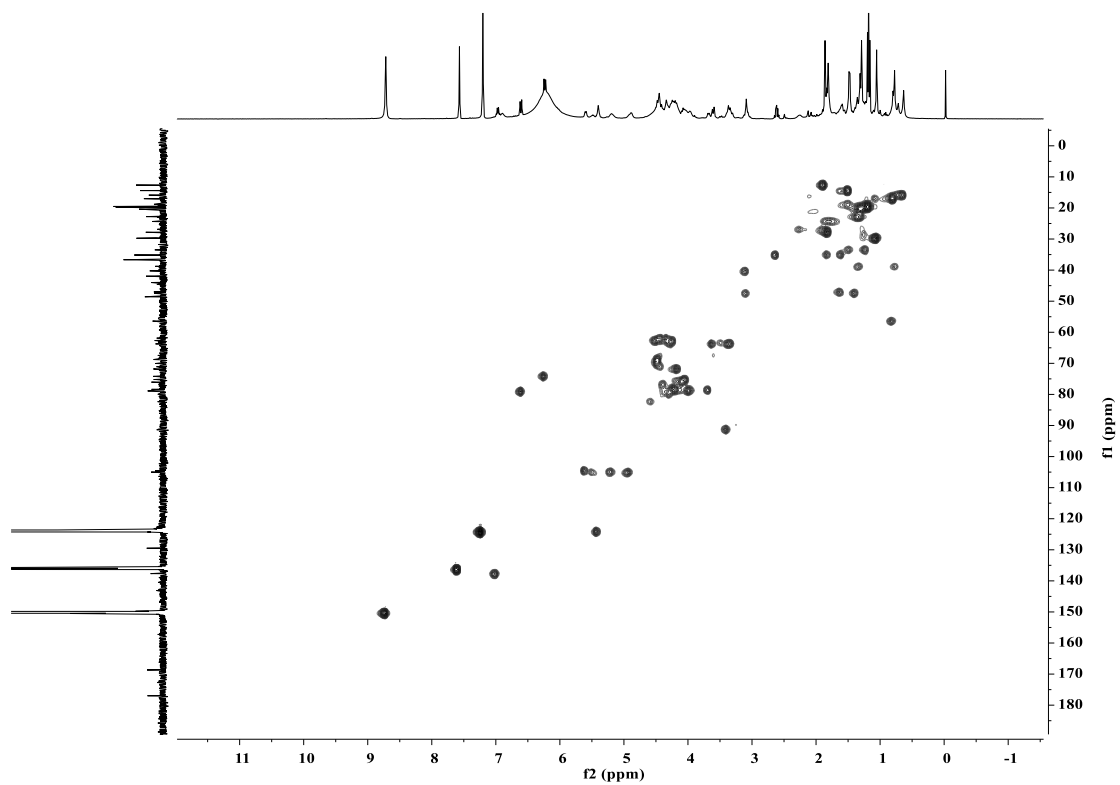

**S59.** HSQC Spectrum of the new compound **9**

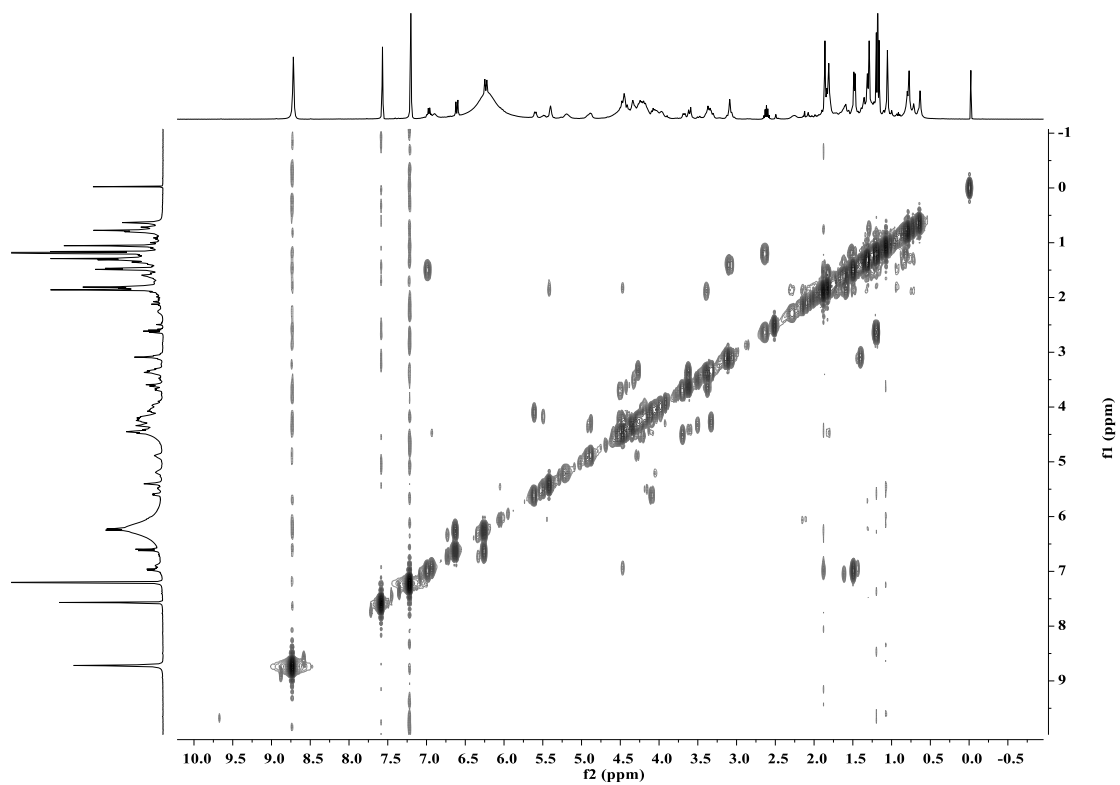

**S60.**  $^1\text{H}$ - $^1\text{H}$  COSY Spectrum of the new compound **9**

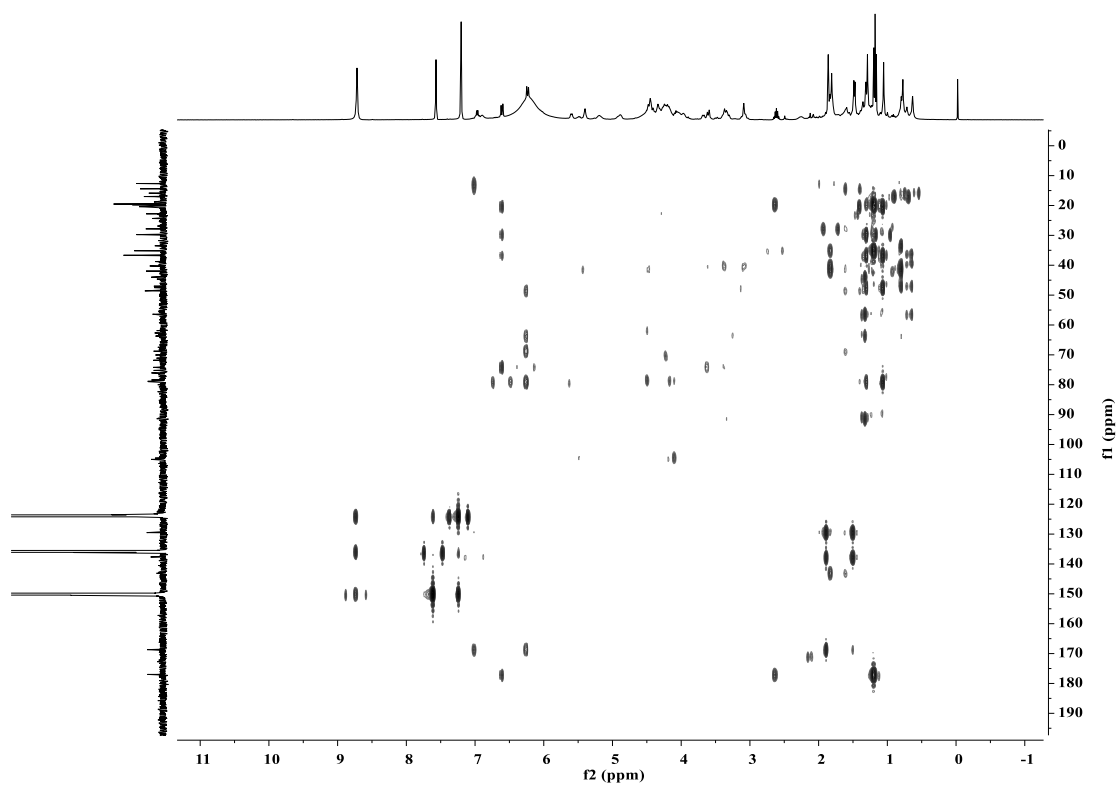

**S61.** HMBC Spectrum of the new compound **9**

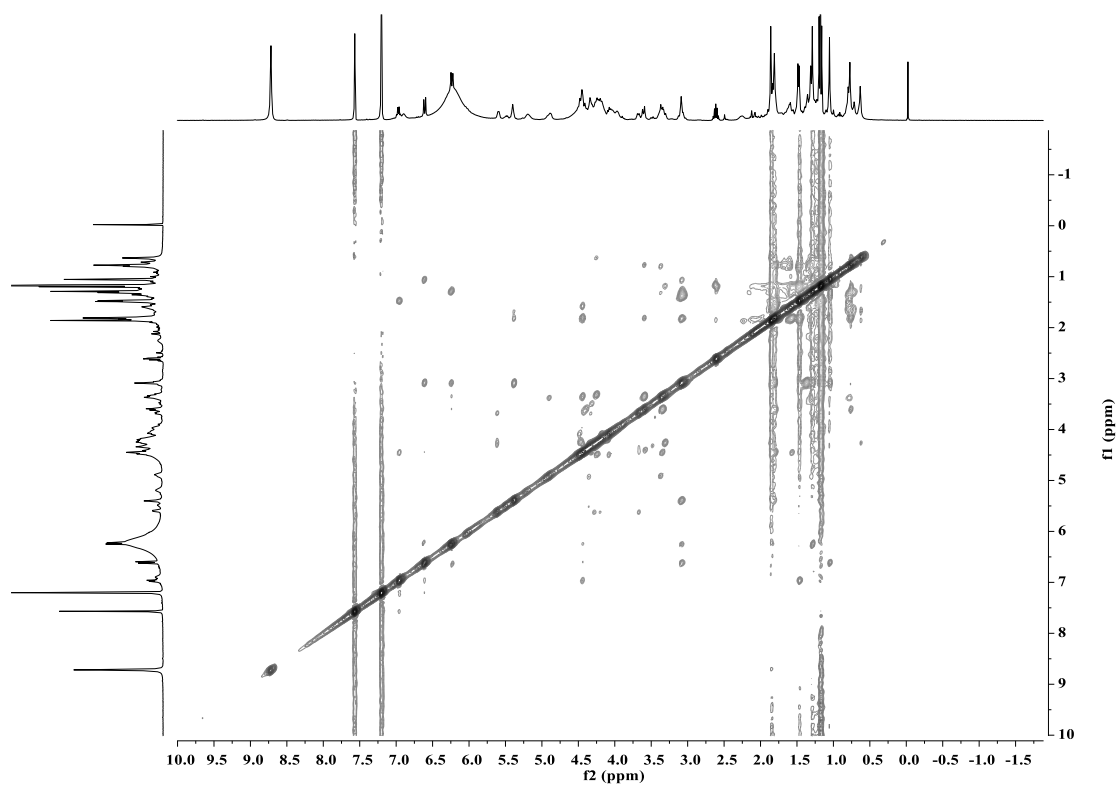

**S62.** NOESY Spectrum of the new compound **9**

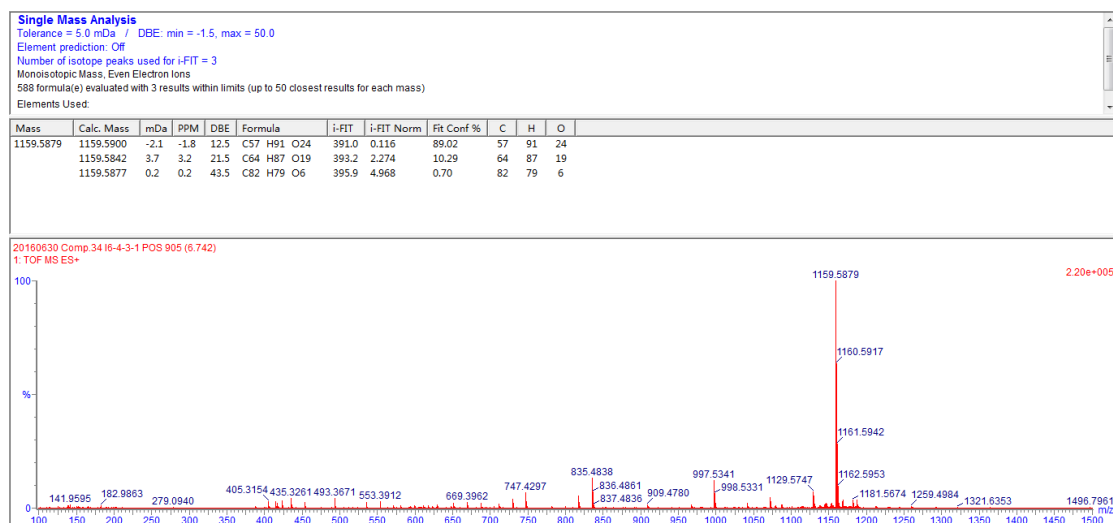

### S63. HRESIMS spectrum of the new compound **9**

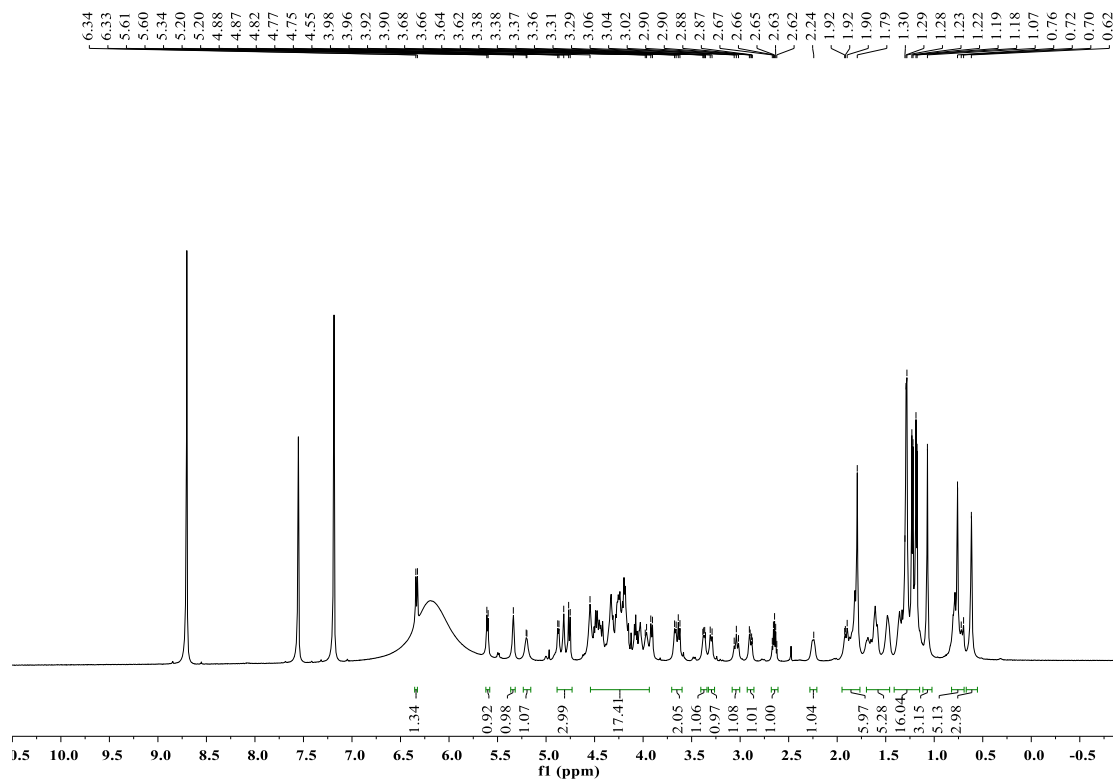

### S64. $^1\text{H}$ NMR Spectrum (600 MHz, Pyridine- $d_5$ ) of the new compound **10**



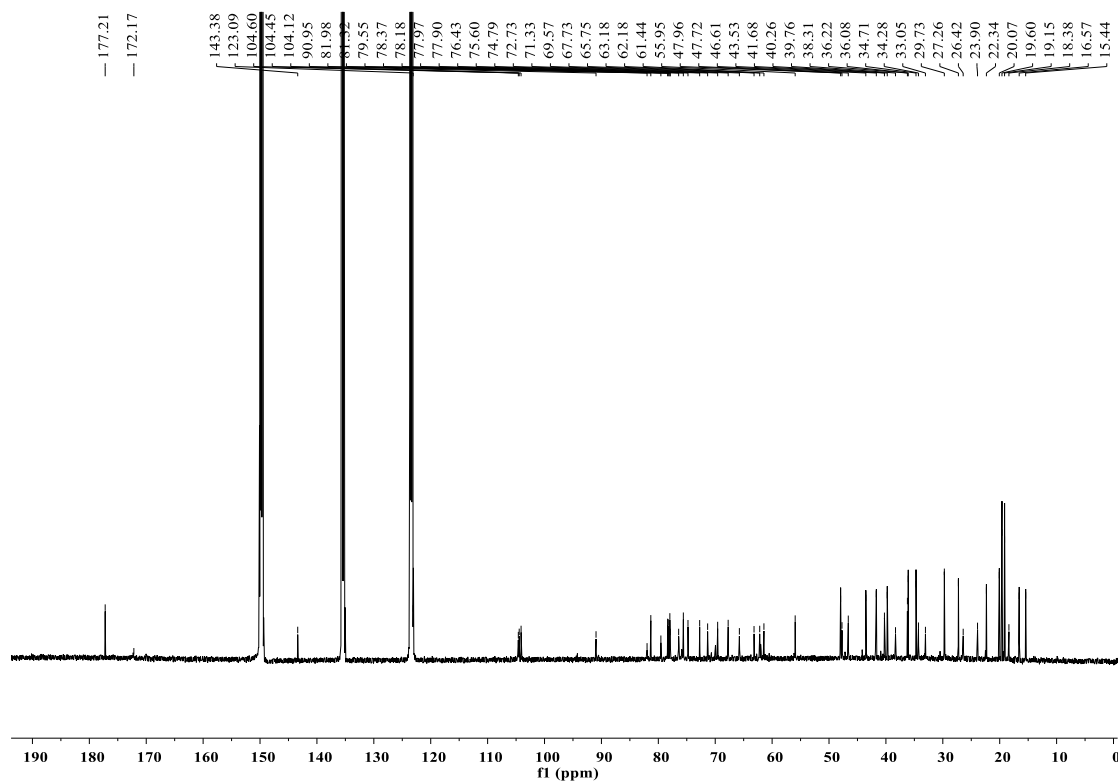

**S65.** <sup>13</sup>C NMR Spectrum (150 MHz, Pyridine-d<sub>5</sub>) of the new compound **10**

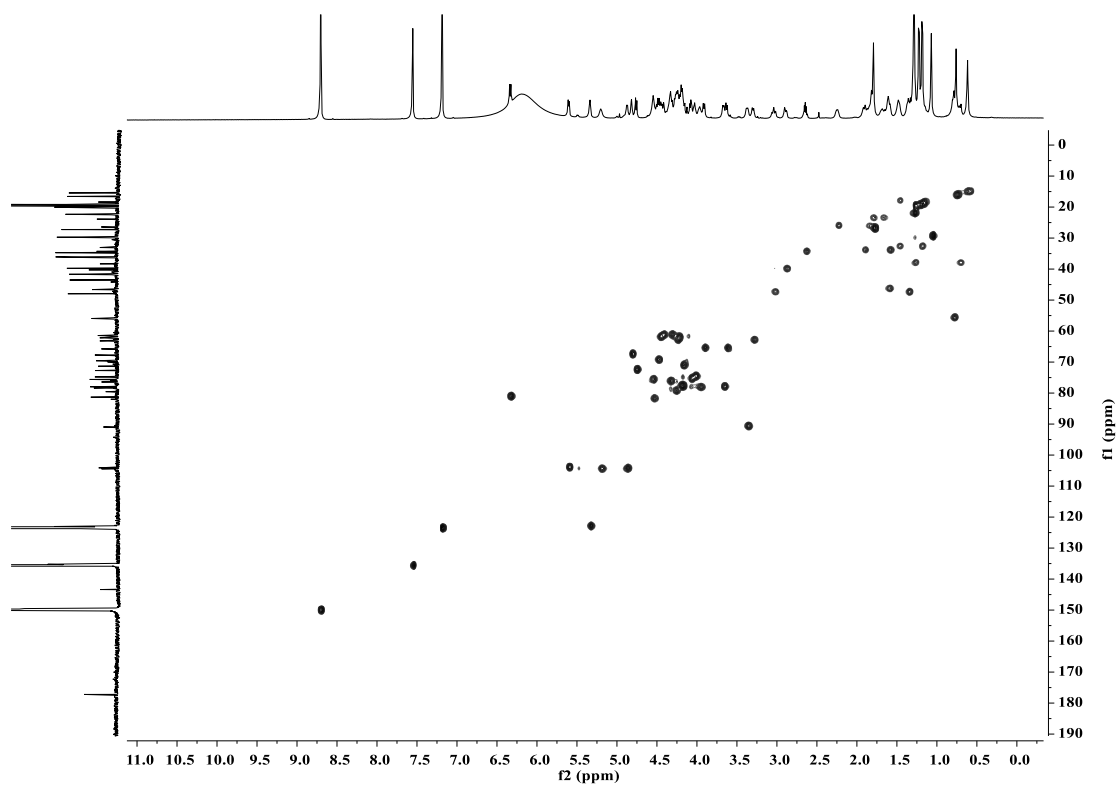

**S66.** HSQC Spectrum of the new compound **10**

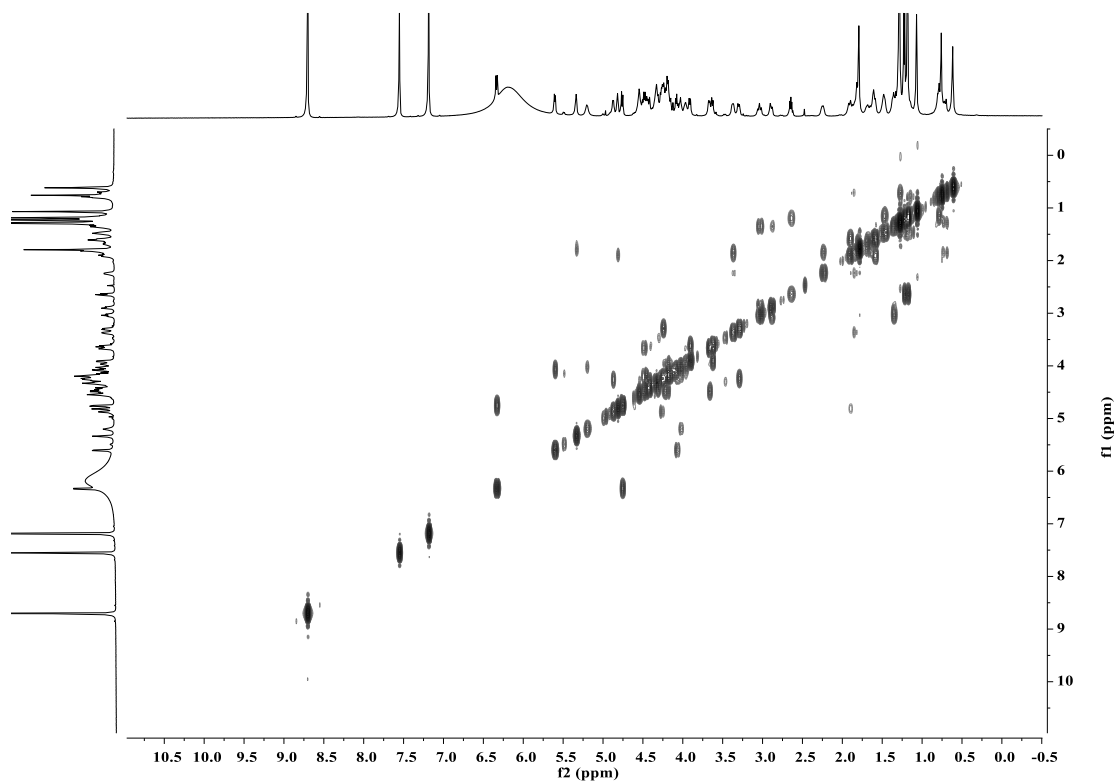

**S67.**  $^1\text{H}$ - $^1\text{H}$  COSY Spectrum of the new compound **10**

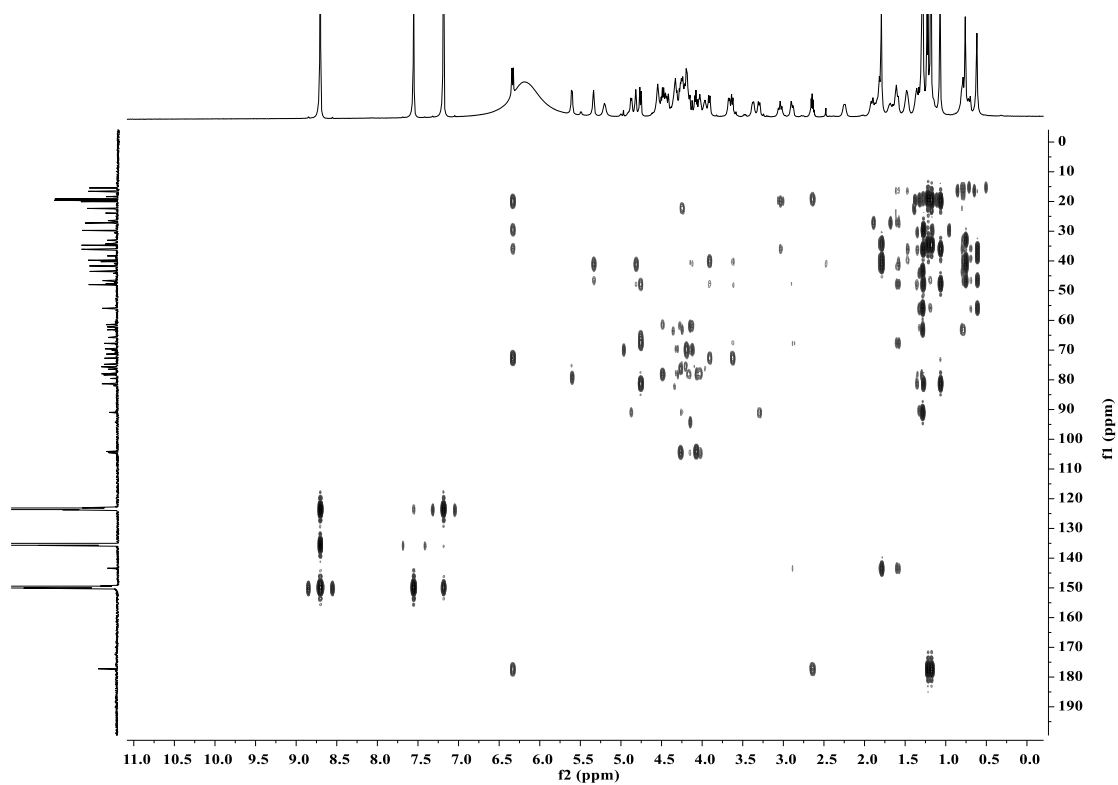

**S68.** HMBC Spectrum of the new compound **10**

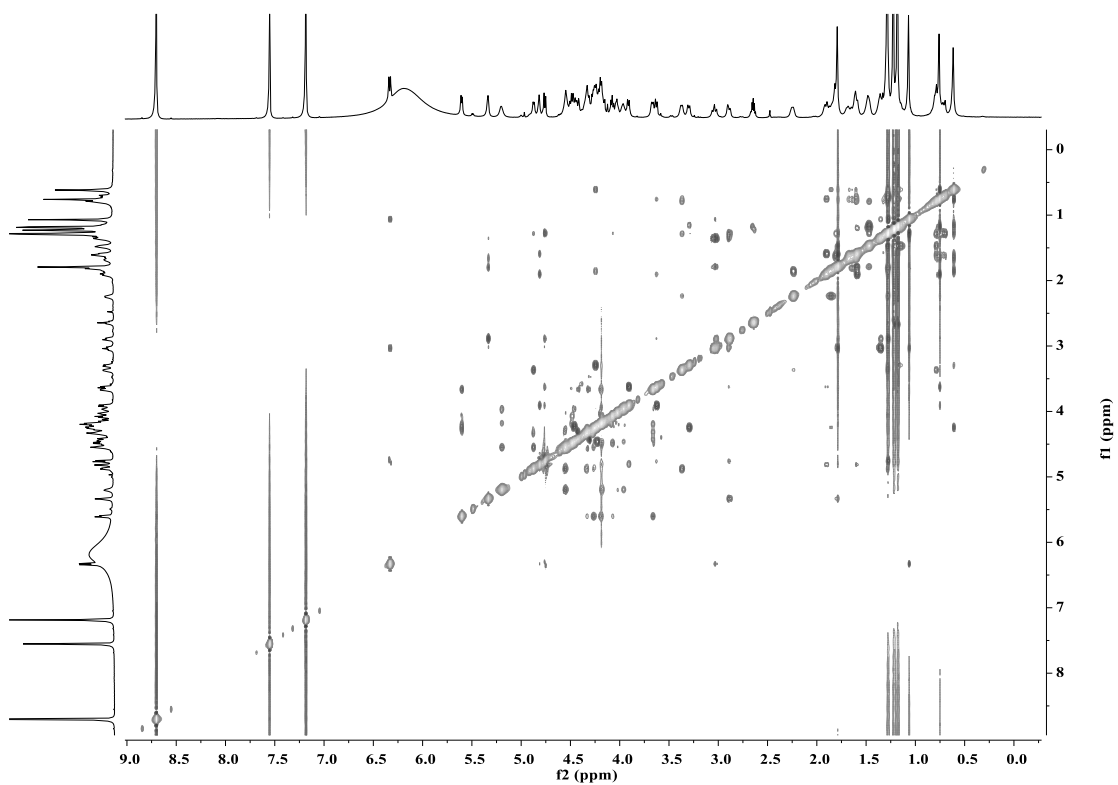

**S69.** NOESY Spectrum of the new compound **10**

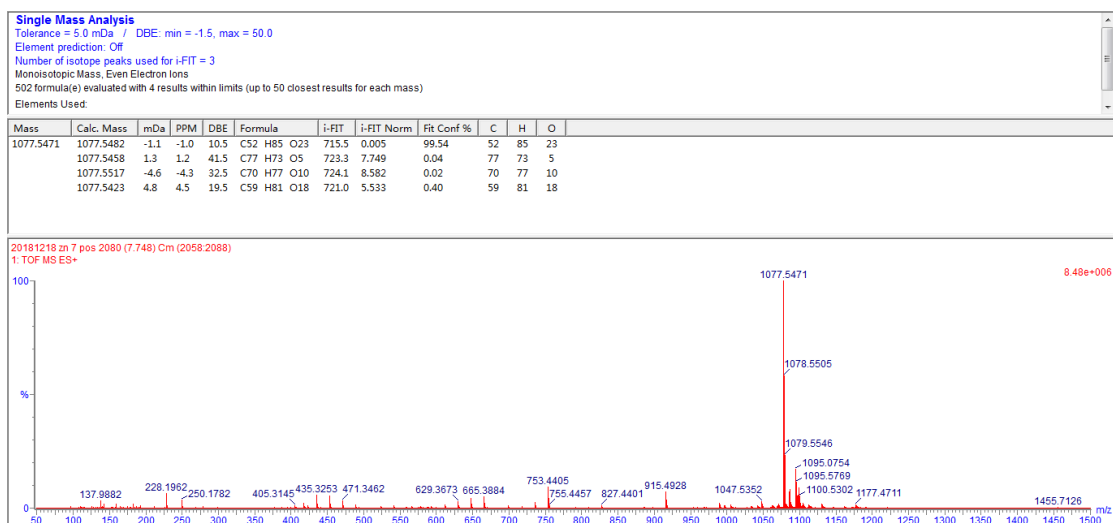

**S70.** HRESIMS spectrum of the new compound **10**

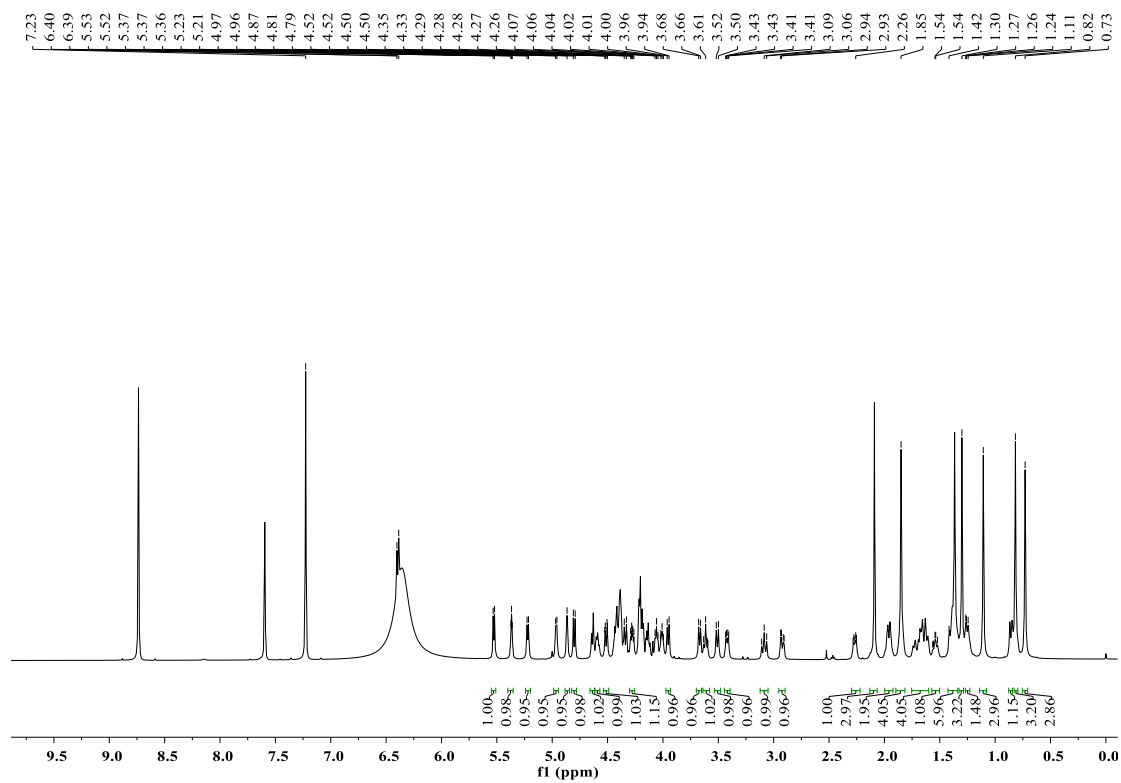

**S71.** <sup>1</sup>H NMR Spectrum (600 MHz, Pyridine-*d*<sub>5</sub>) of the new compound **11**

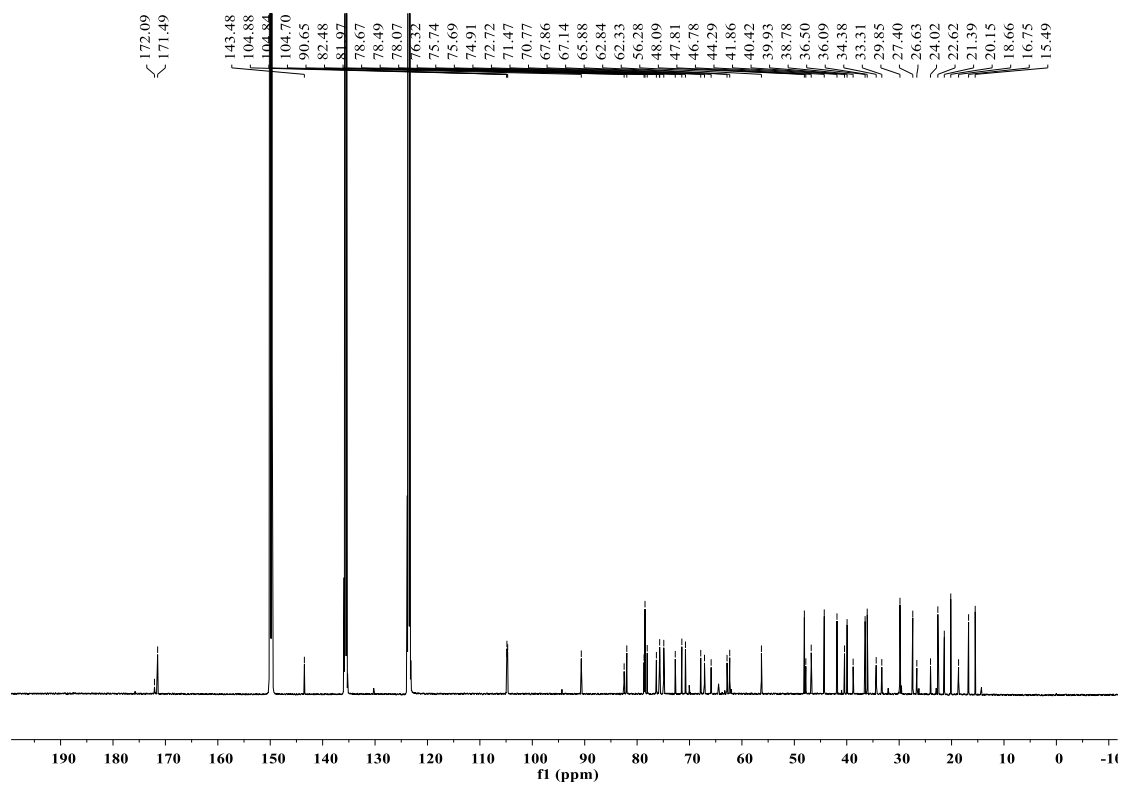

**S72.** <sup>13</sup>C NMR Spectrum (150 MHz, Pyridine-*d*<sub>5</sub>) of the new compound **11**

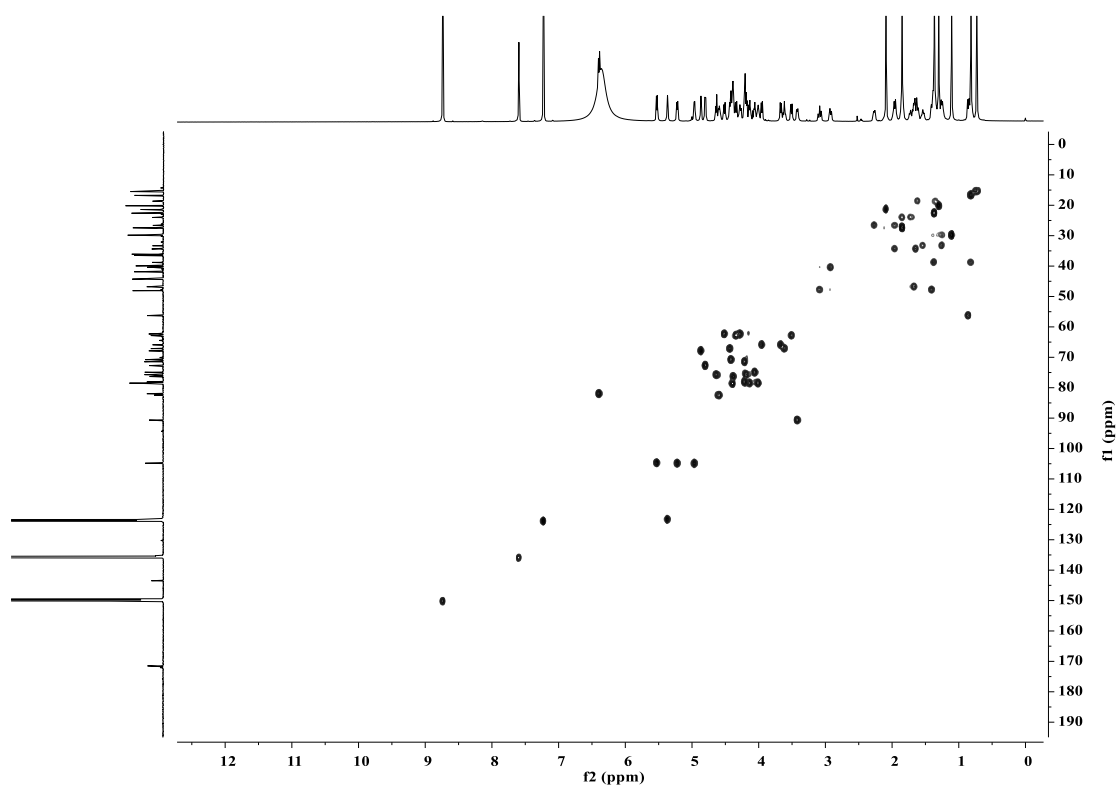

**S73.** HSQC Spectrum of the new compound **11**

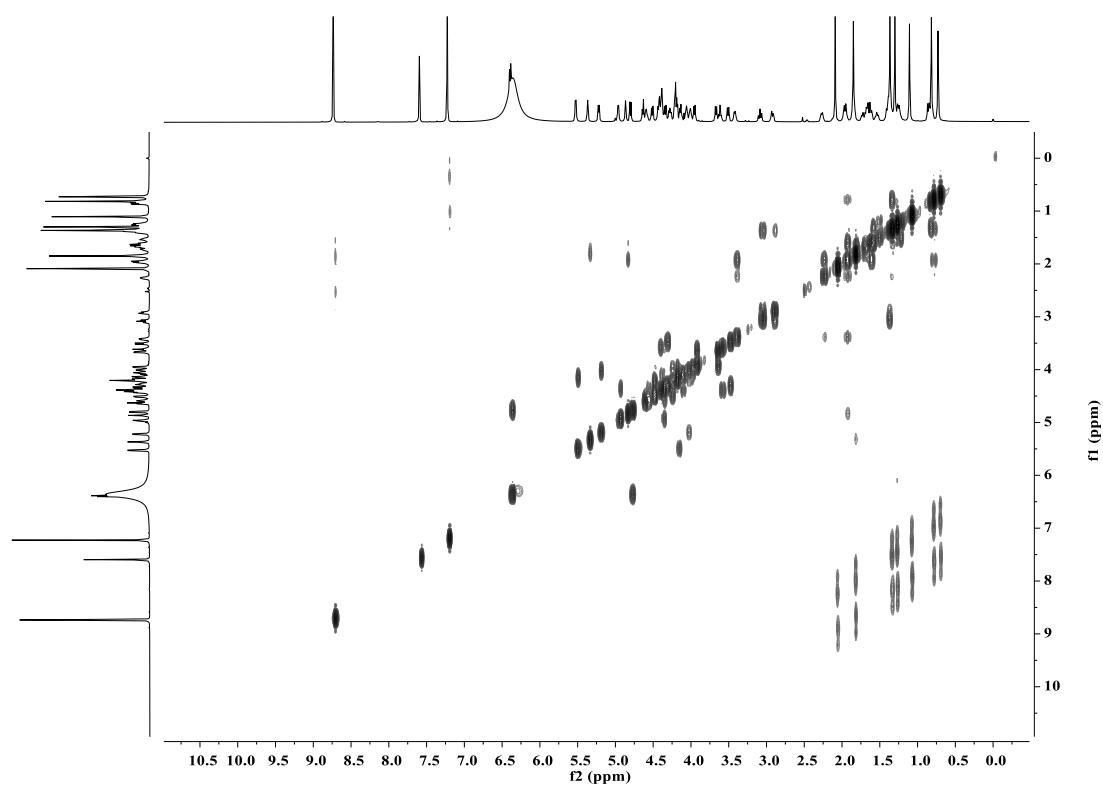

**S74.**  $^1\text{H}$ - $^1\text{H}$  COSY Spectrum of the new compound **11**

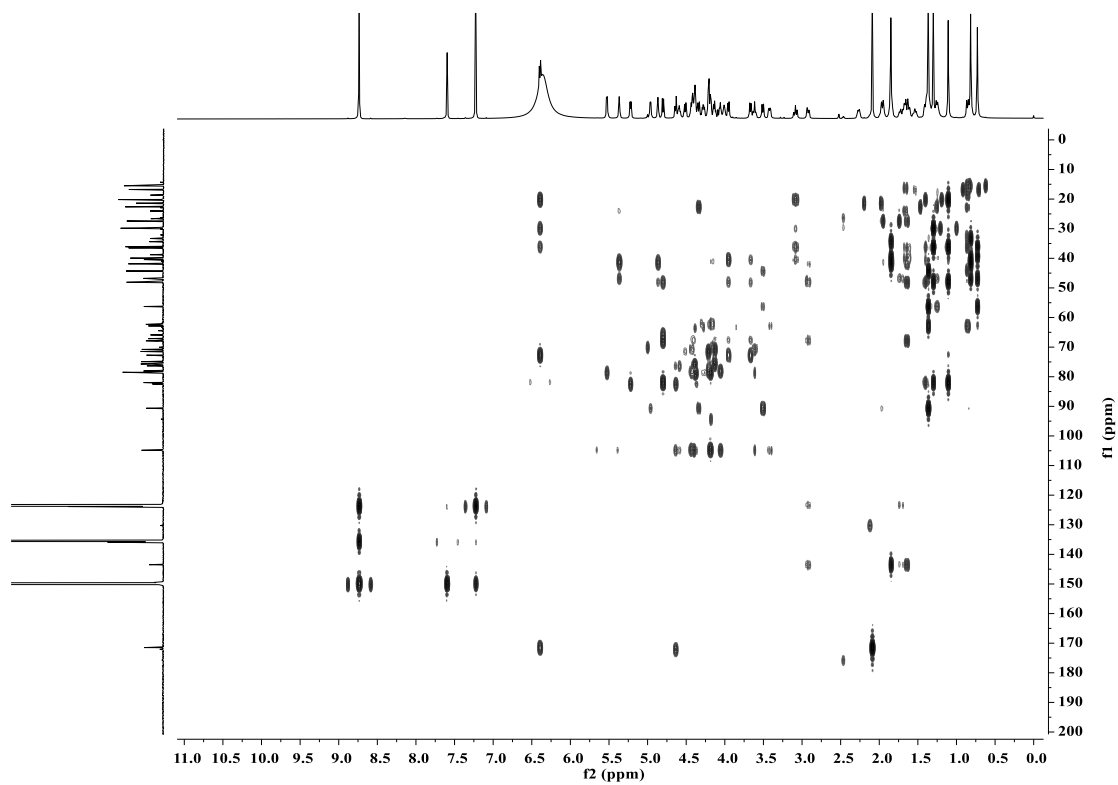

**S75.** HMBC Spectrum of the new compound **11**

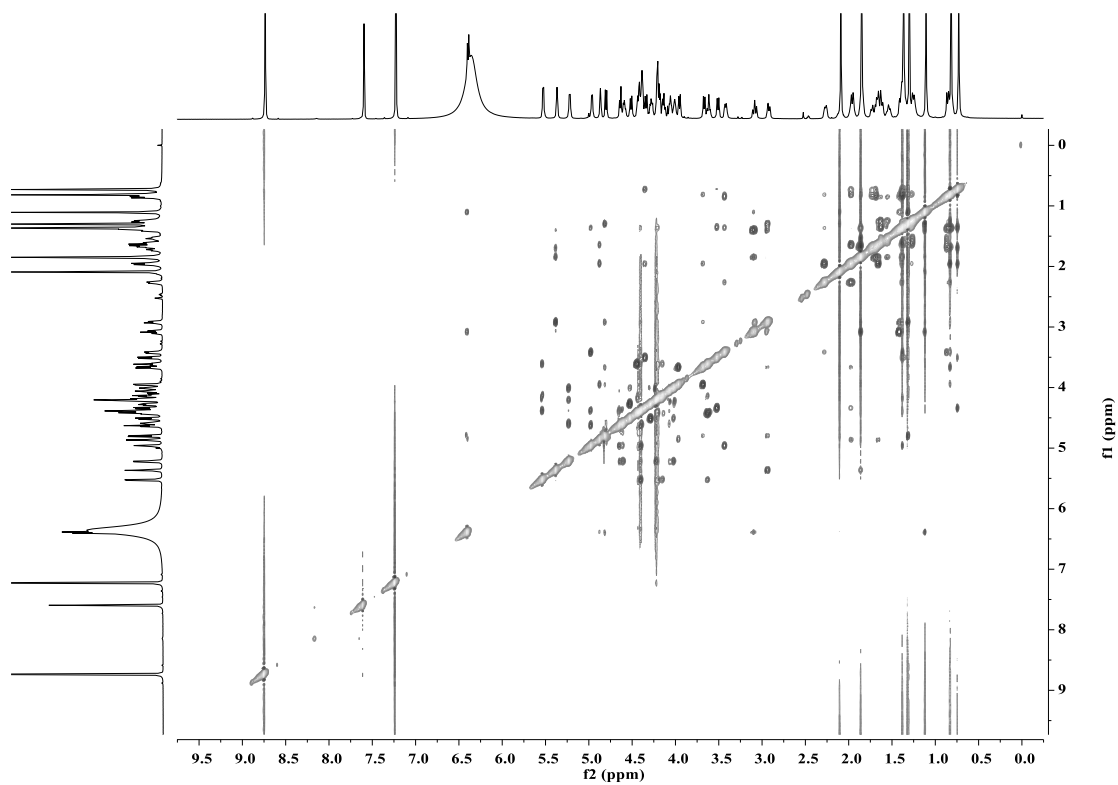

**S76.** NOESY Spectrum of the new compound **11**

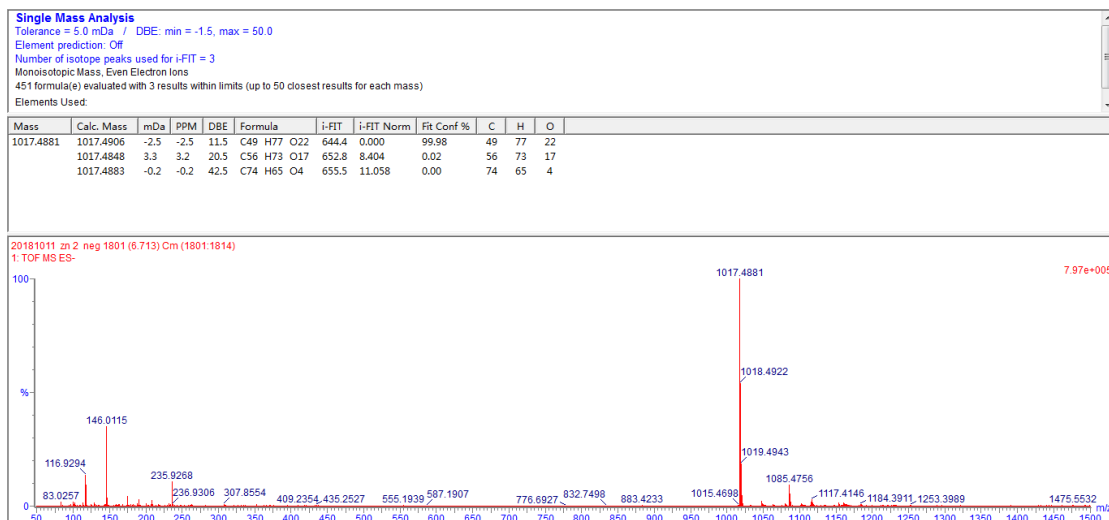

**S77.** HRESIMS spectrum of the new compound **11**

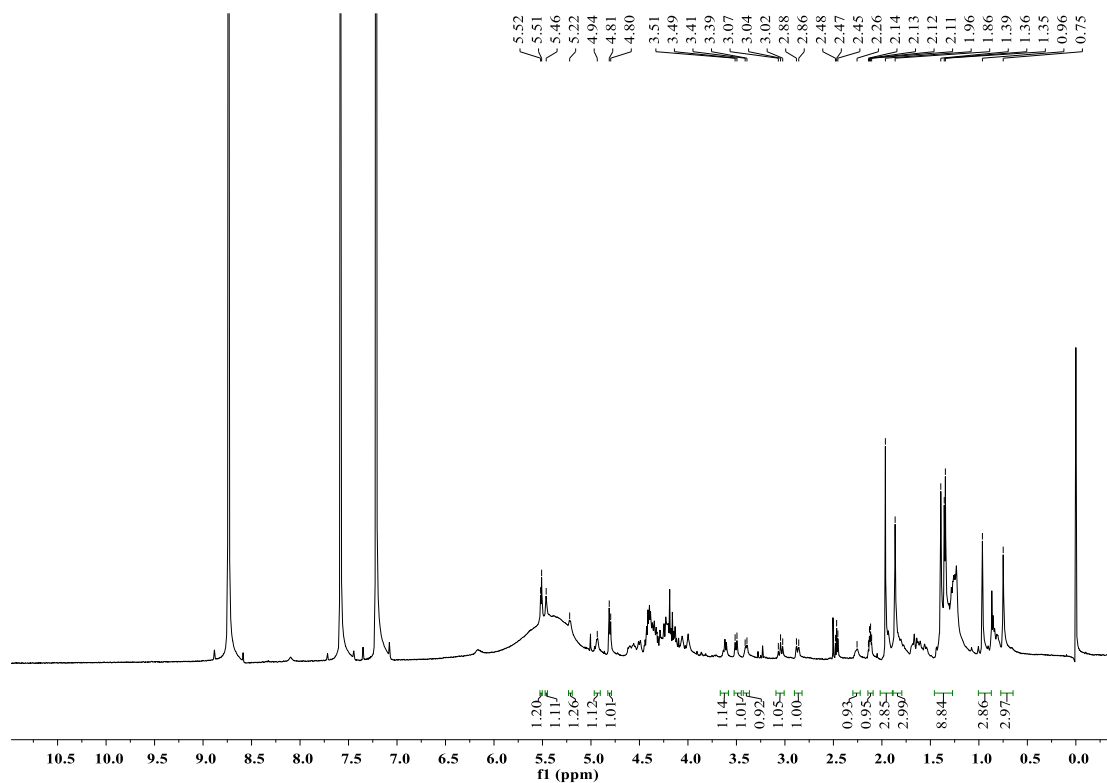

**S78.** <sup>1</sup>H NMR Spectrum (600 MHz, Pyridine-*d*<sub>5</sub>) of the new compound **12**

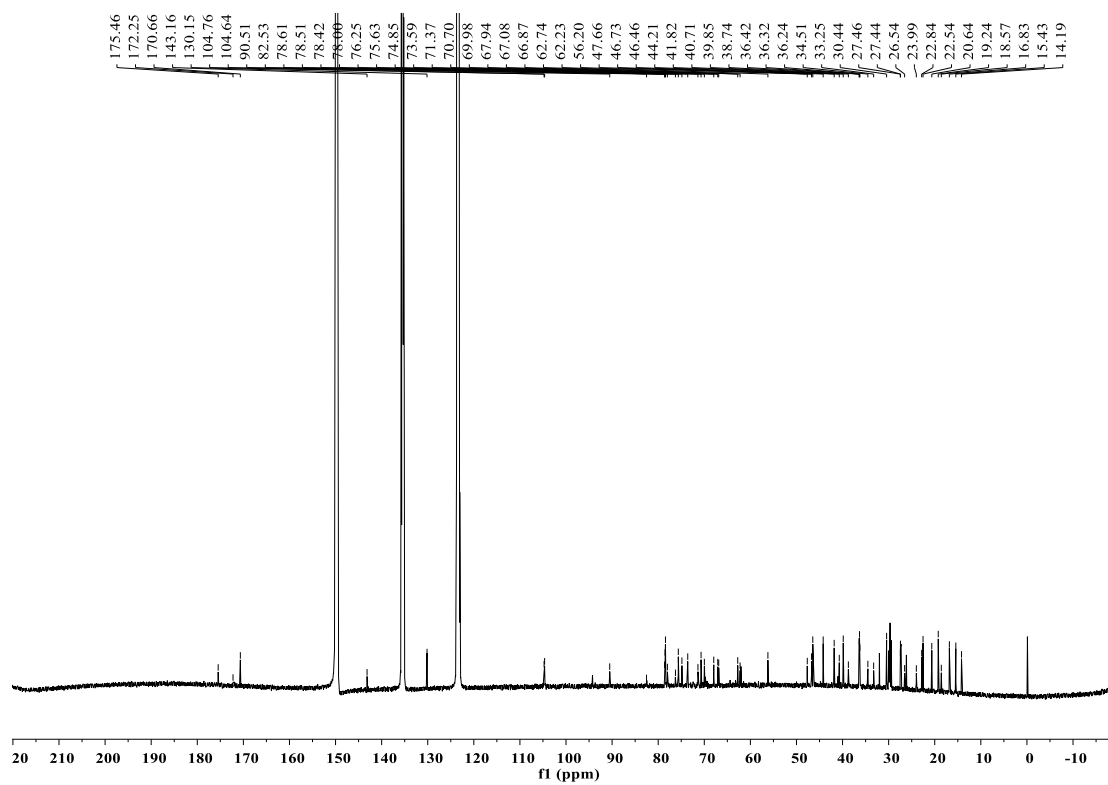

**S79.** <sup>13</sup>C NMR Spectrum (150 MHz, Pyridine-*d*<sub>5</sub>) of the new compound **12**

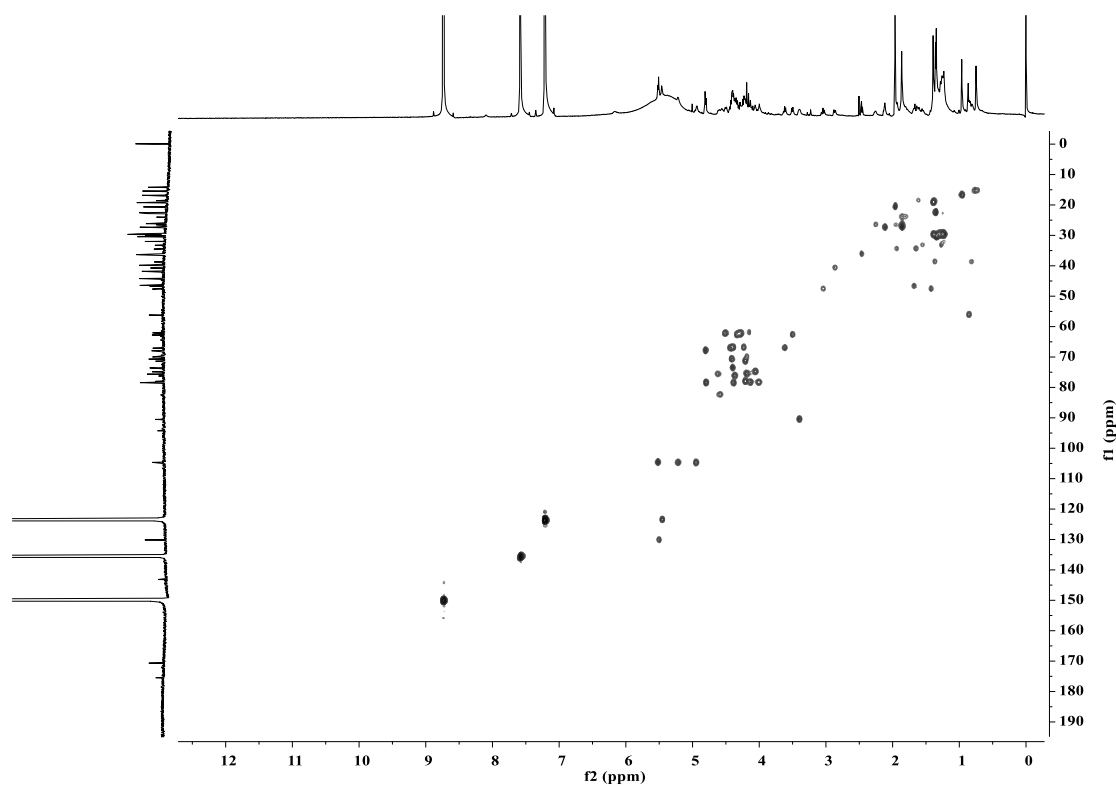

**S80.** HSQC Spectrum of the new compound **12**





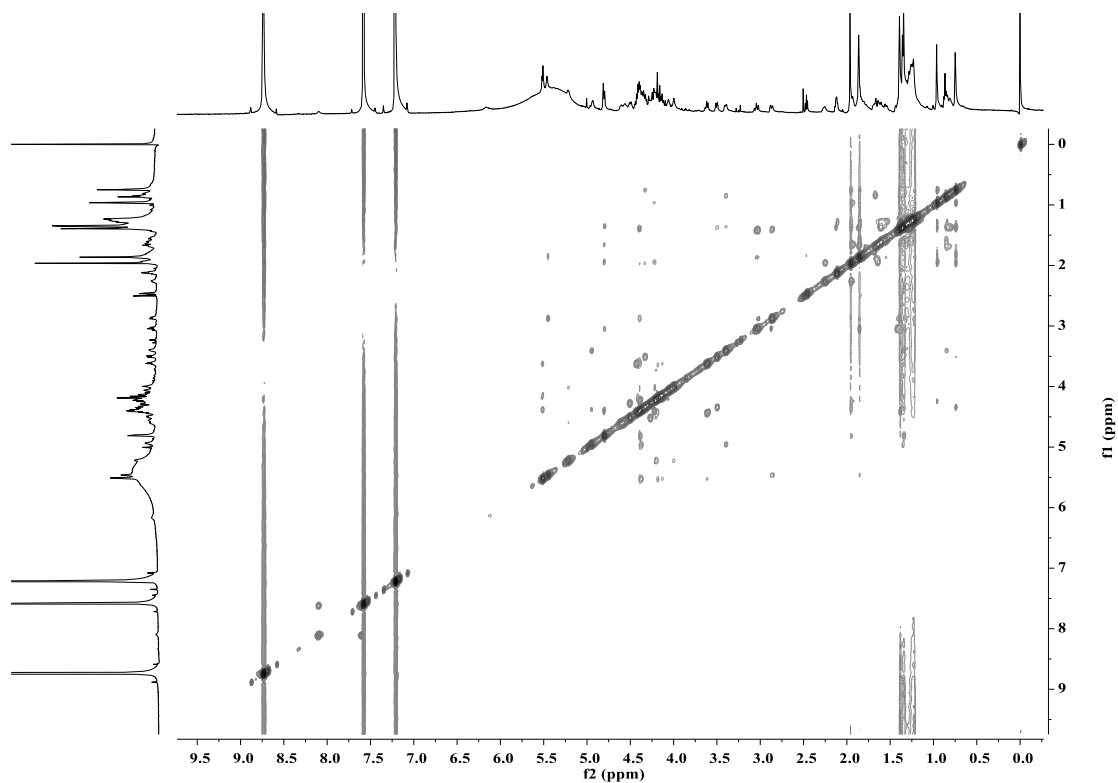

**S83.** NOESY Spectrum of the new compound **12**

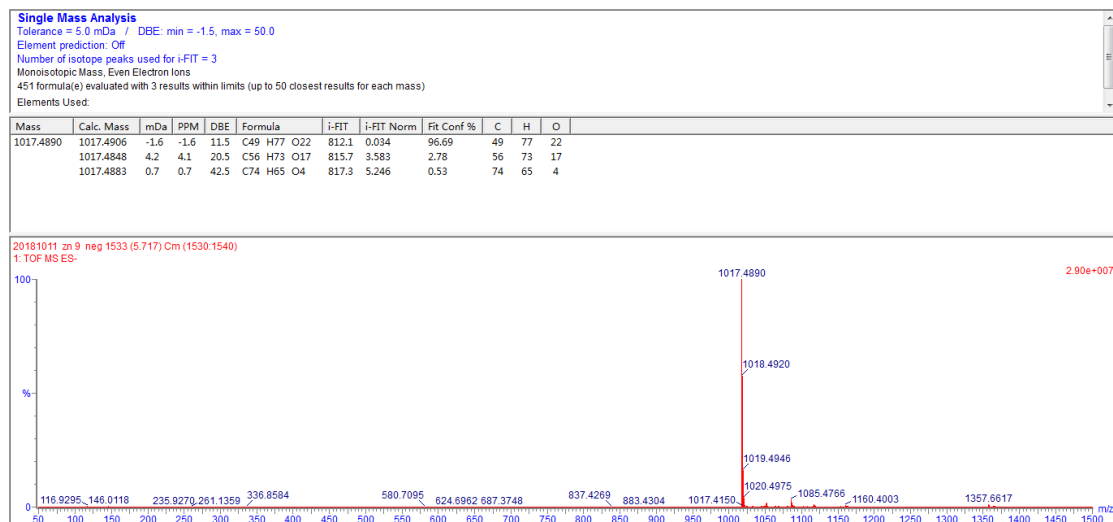

**S84.** HRESIMS spectrum of the new compound **12**

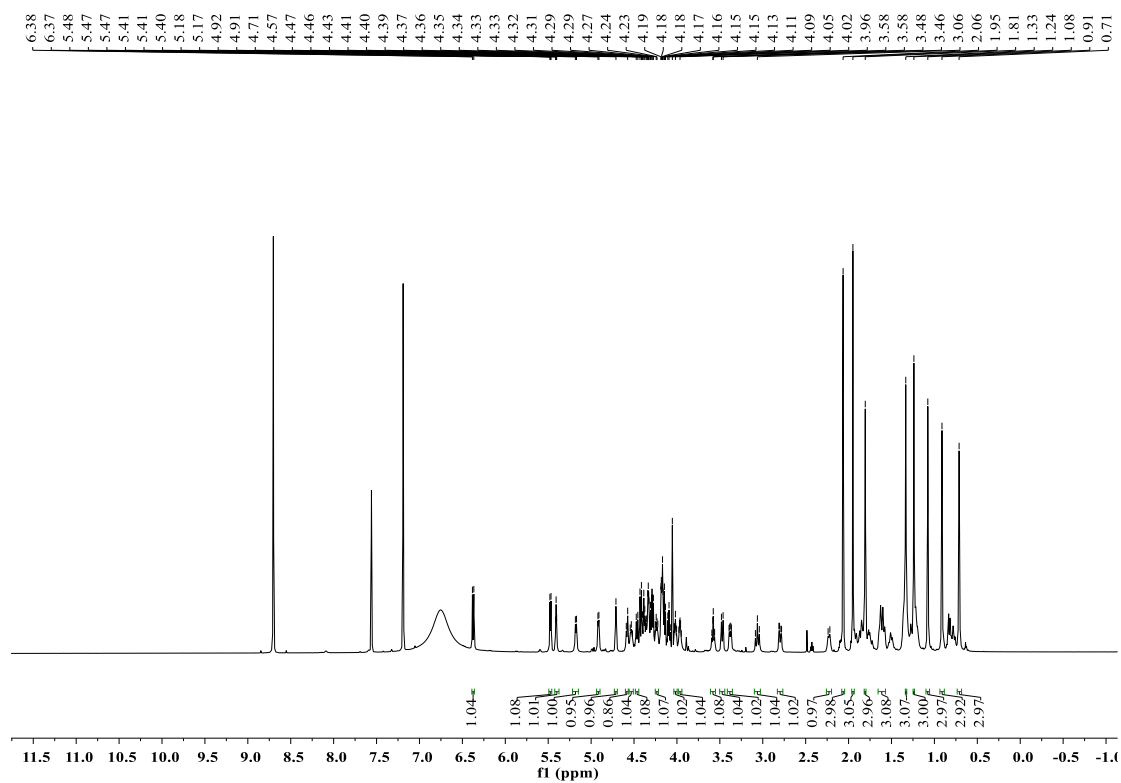

**S85.** <sup>1</sup>H NMR Spectrum (600 MHz, Pyridine-*d*<sub>5</sub>) of the new compound **13**

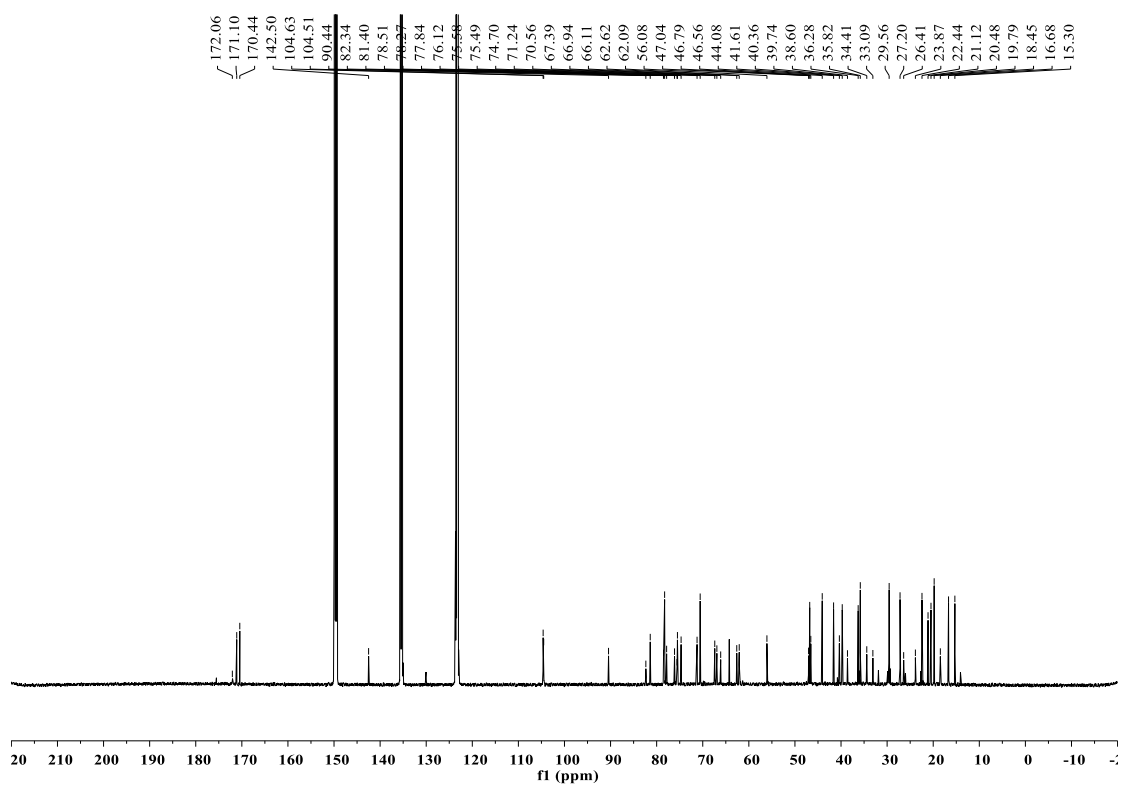

**S86.** <sup>13</sup>C NMR Spectrum (150 MHz, Pyridine-*d*<sub>5</sub>) of the new compound **13**

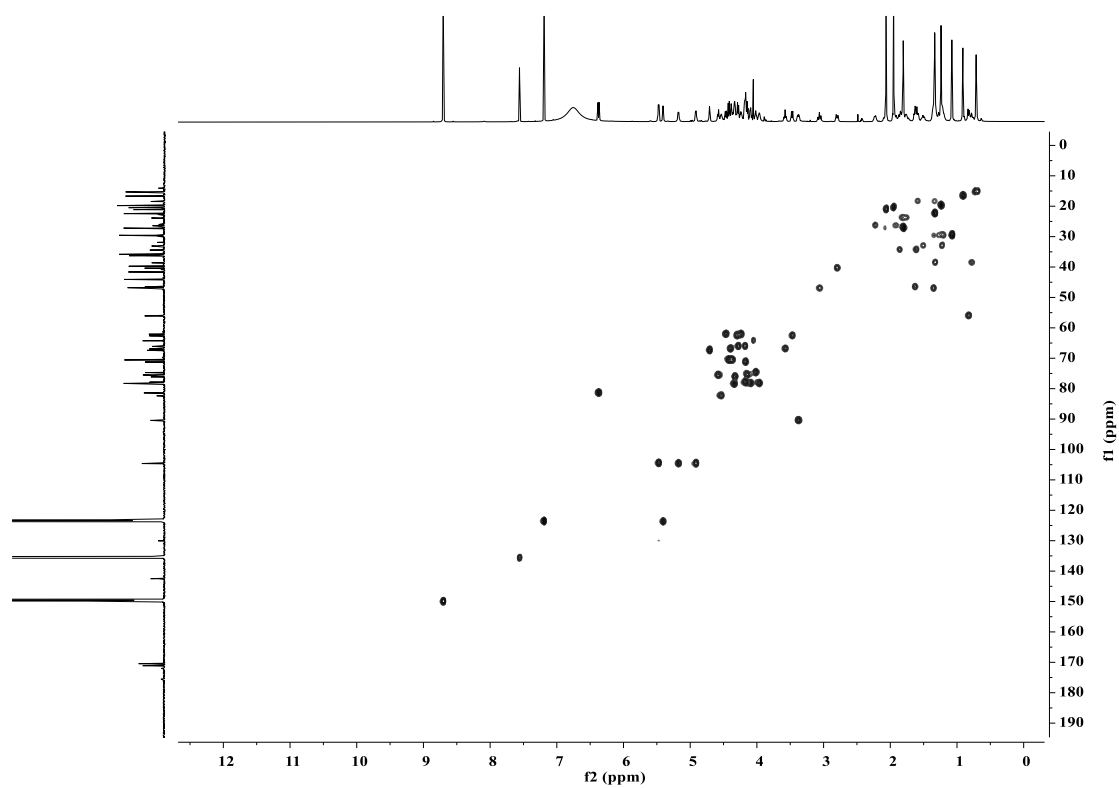

**S87.** HSQC Spectrum of the new compound **13**

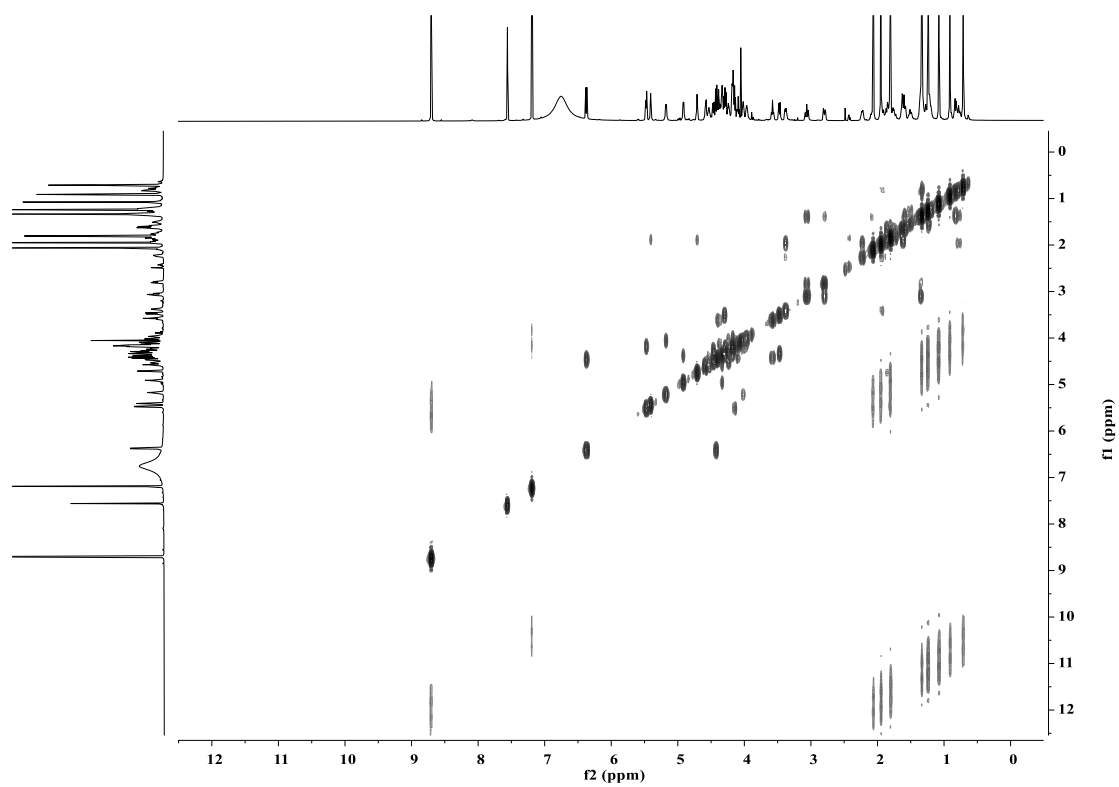

**S88.**  $^1\text{H}$ - $^1\text{H}$  COSY Spectrum of the new compound **13**

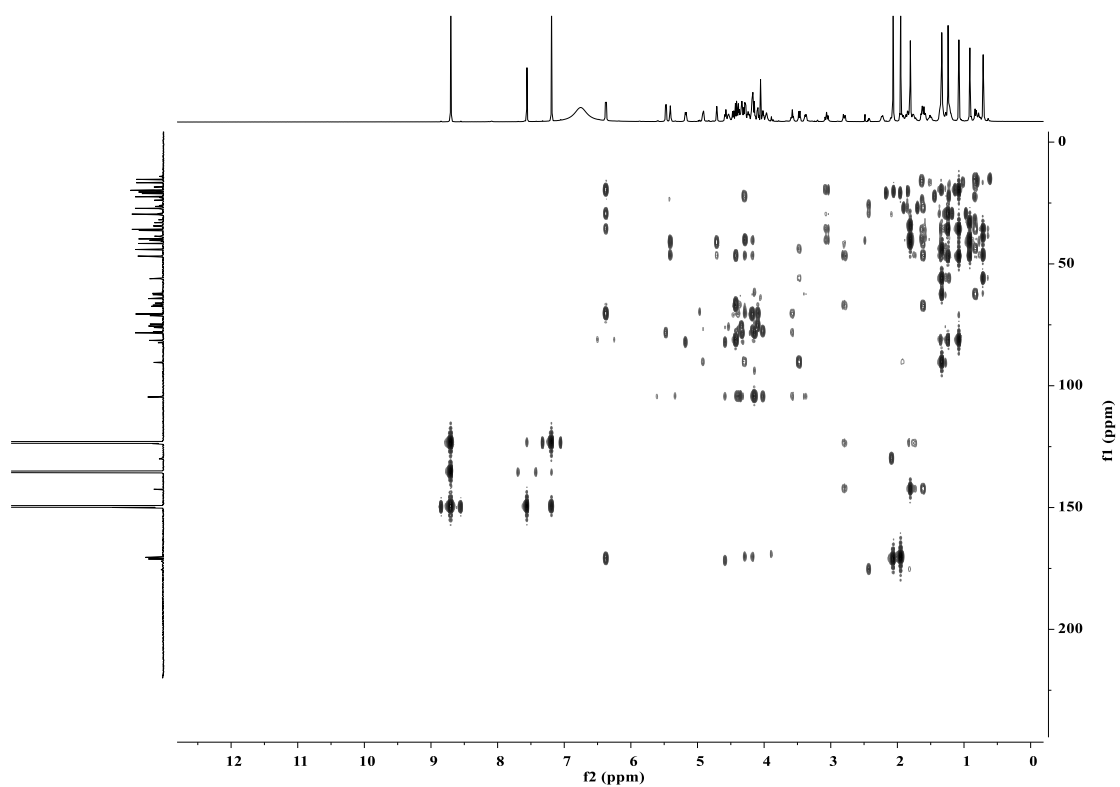

**S89.** HMBC Spectrum of the new compound **13**

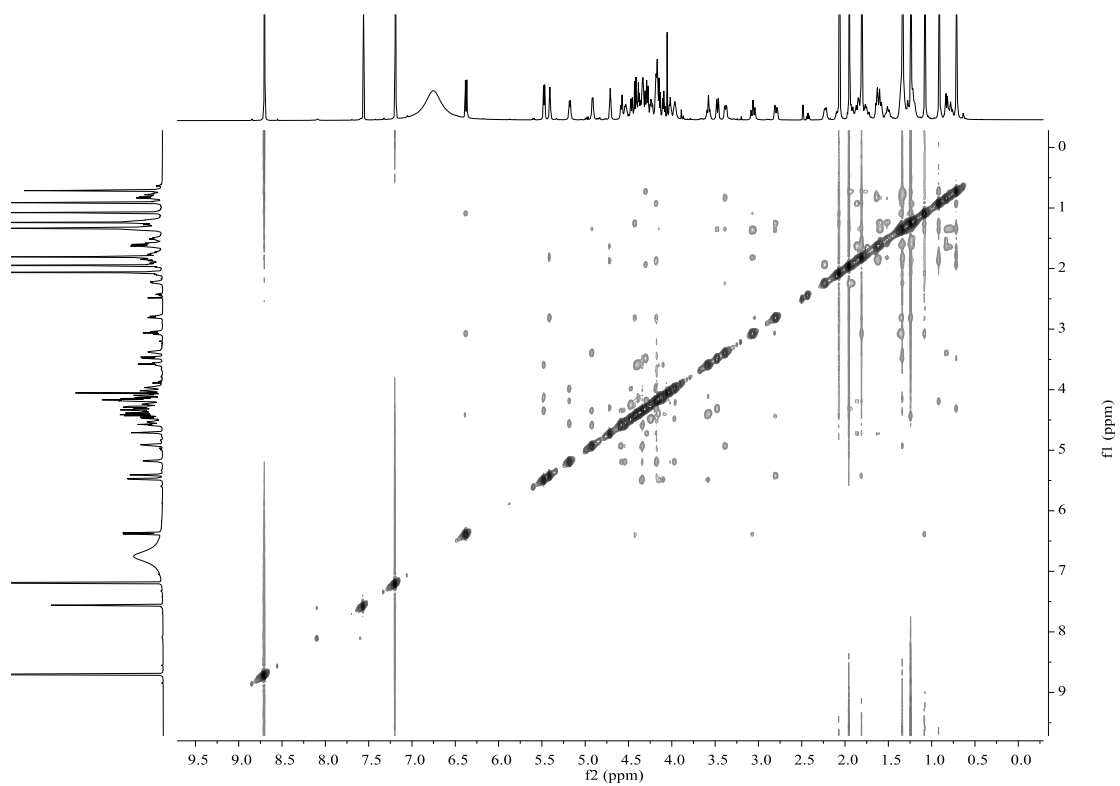

**S90.** NOESY Spectrum of the new compound **13**

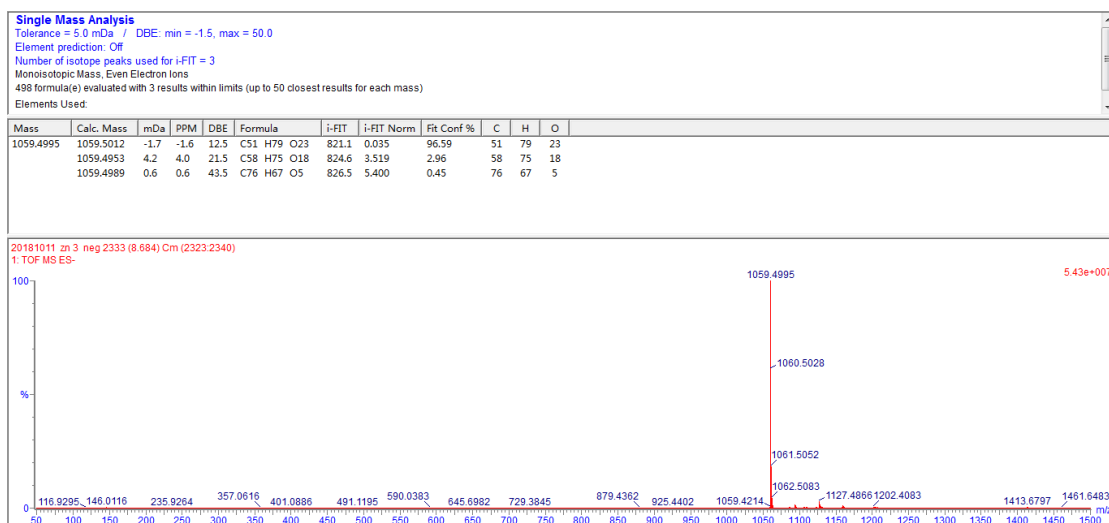

### S91. HRESIMS spectrum of the new compound **13**

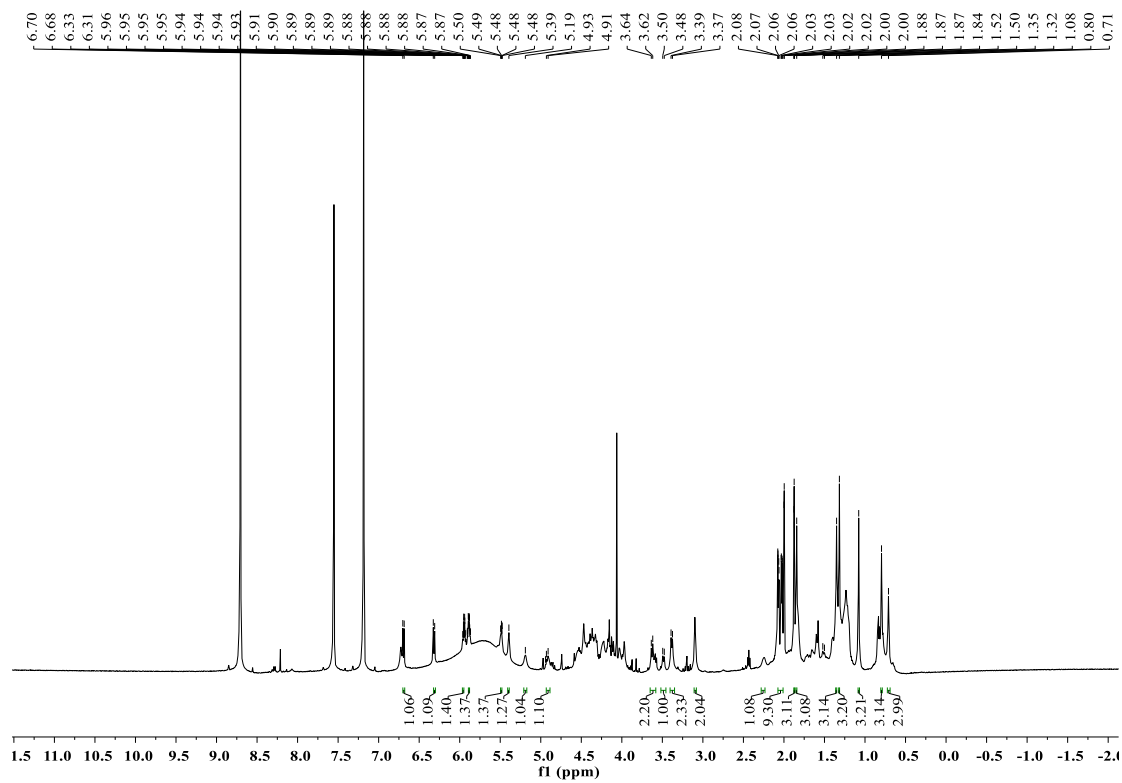

### S92. <sup>1</sup>H NMR Spectrum (600 MHz, Pyridine-*d*<sub>5</sub>) of the new compound **14**

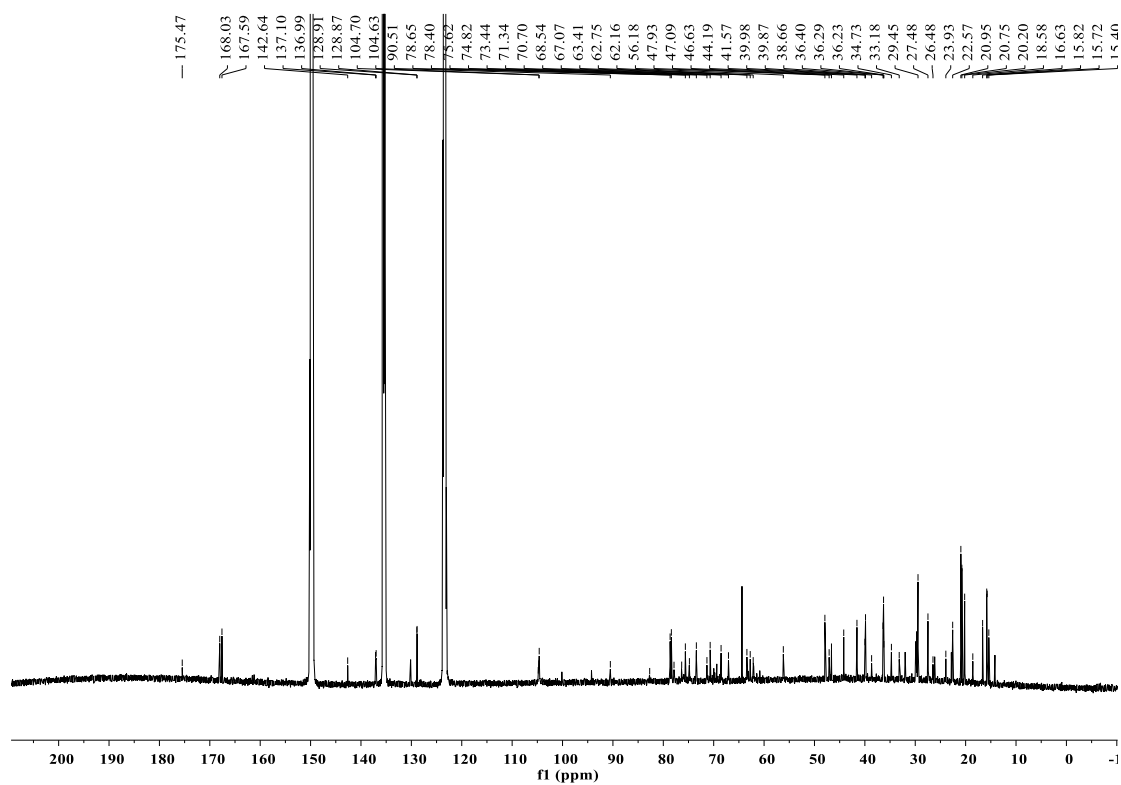

**S93.**  $^{13}\text{C}$  NMR Spectrum (150 MHz, Pyridine- $d_5$ ) of the new compound **14**

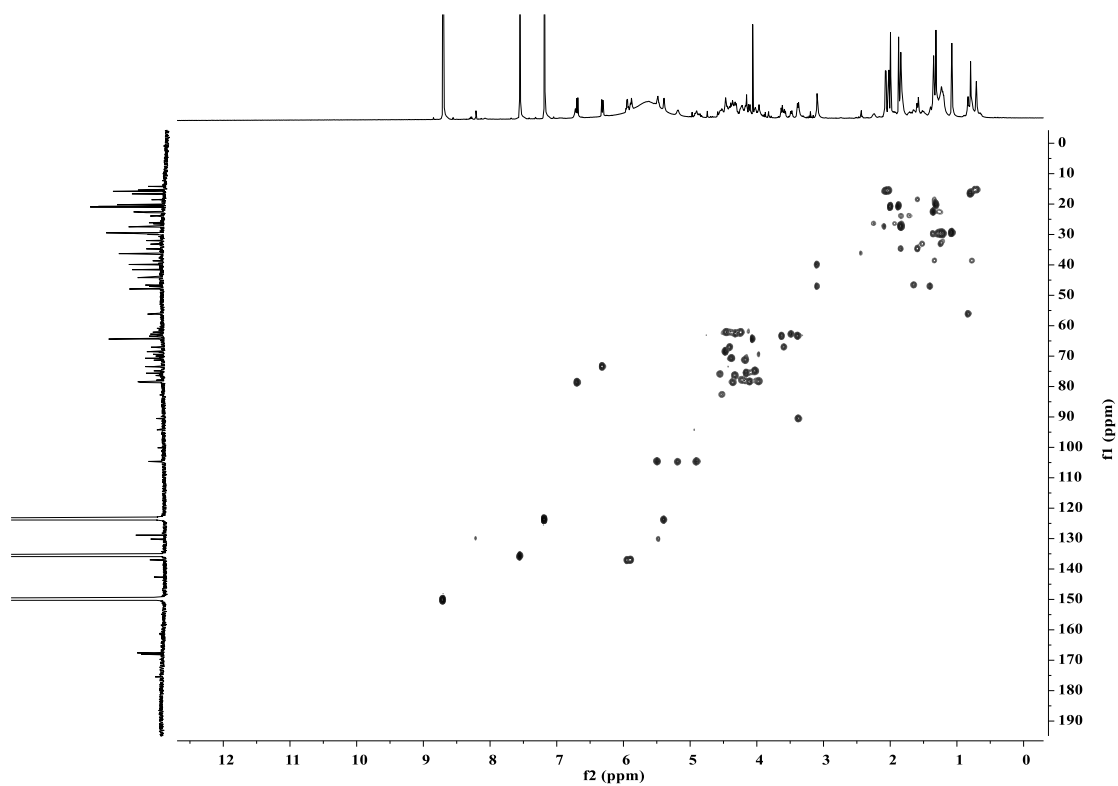

**S94.** HSQC Spectrum of the new compound **14**

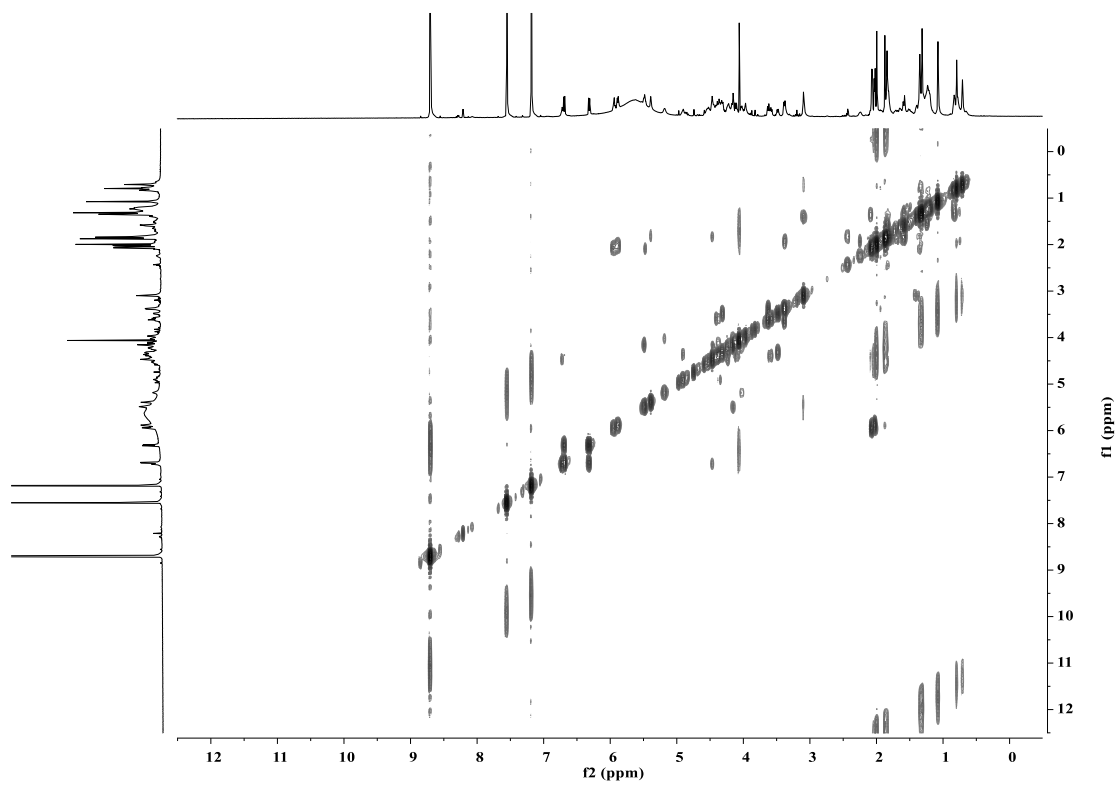

**S95.**  $^1\text{H}$ - $^1\text{H}$  COSY Spectrum of the new compound **14**

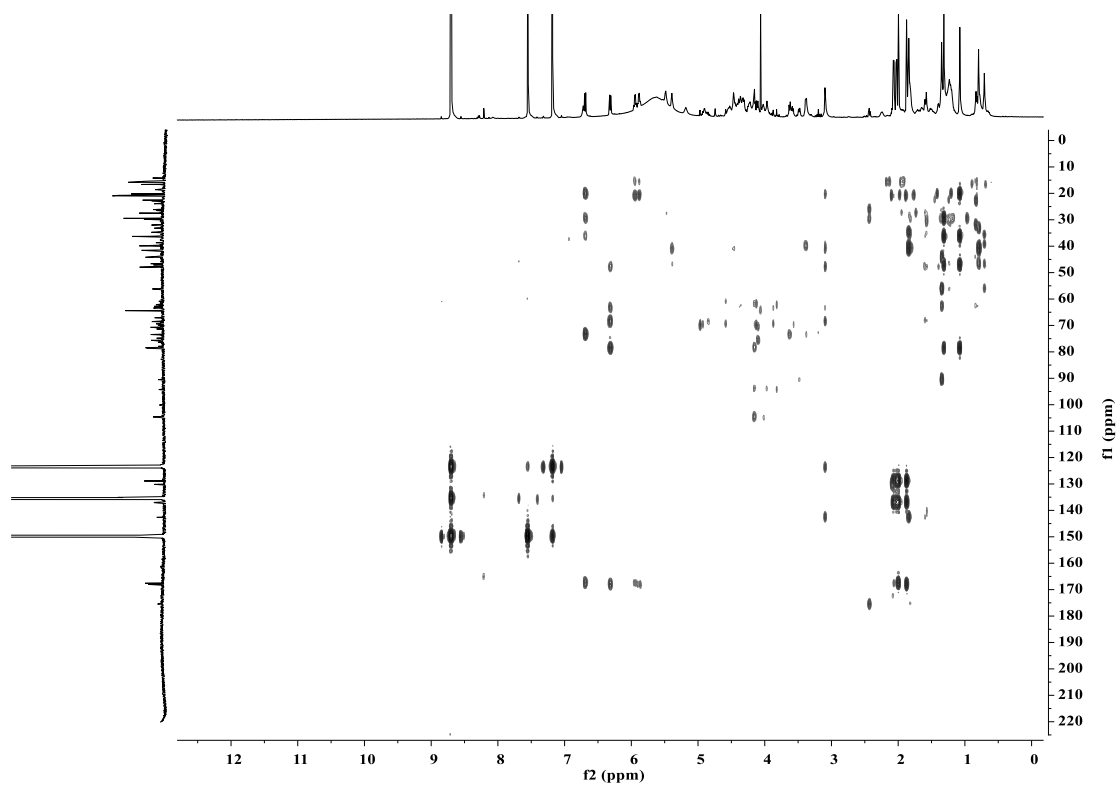

**S96.** HMBC Spectrum of the new compound **14**



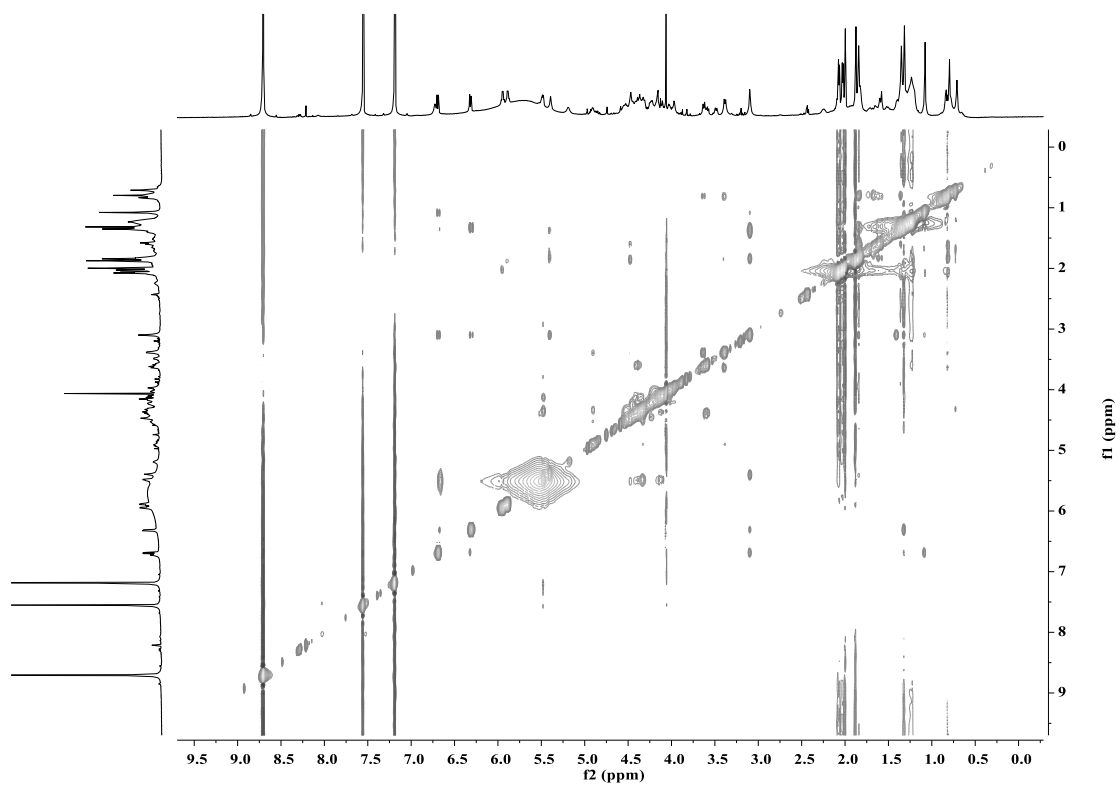

**S97. NOESY Spectrum of the new compound 14**

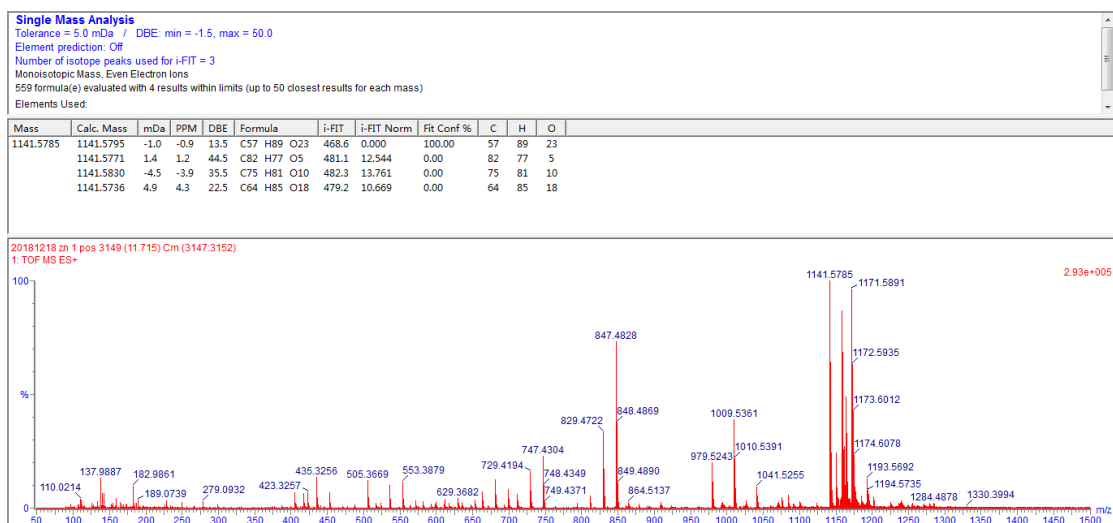

**S98. HRESIMS spectrum of the new compound 14**

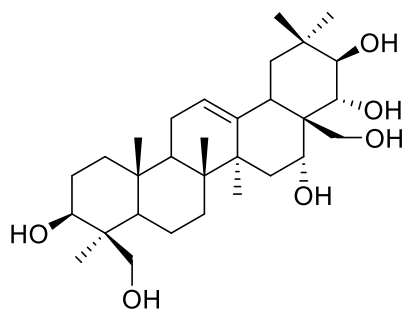

**S99.** The structure of compound **14a**

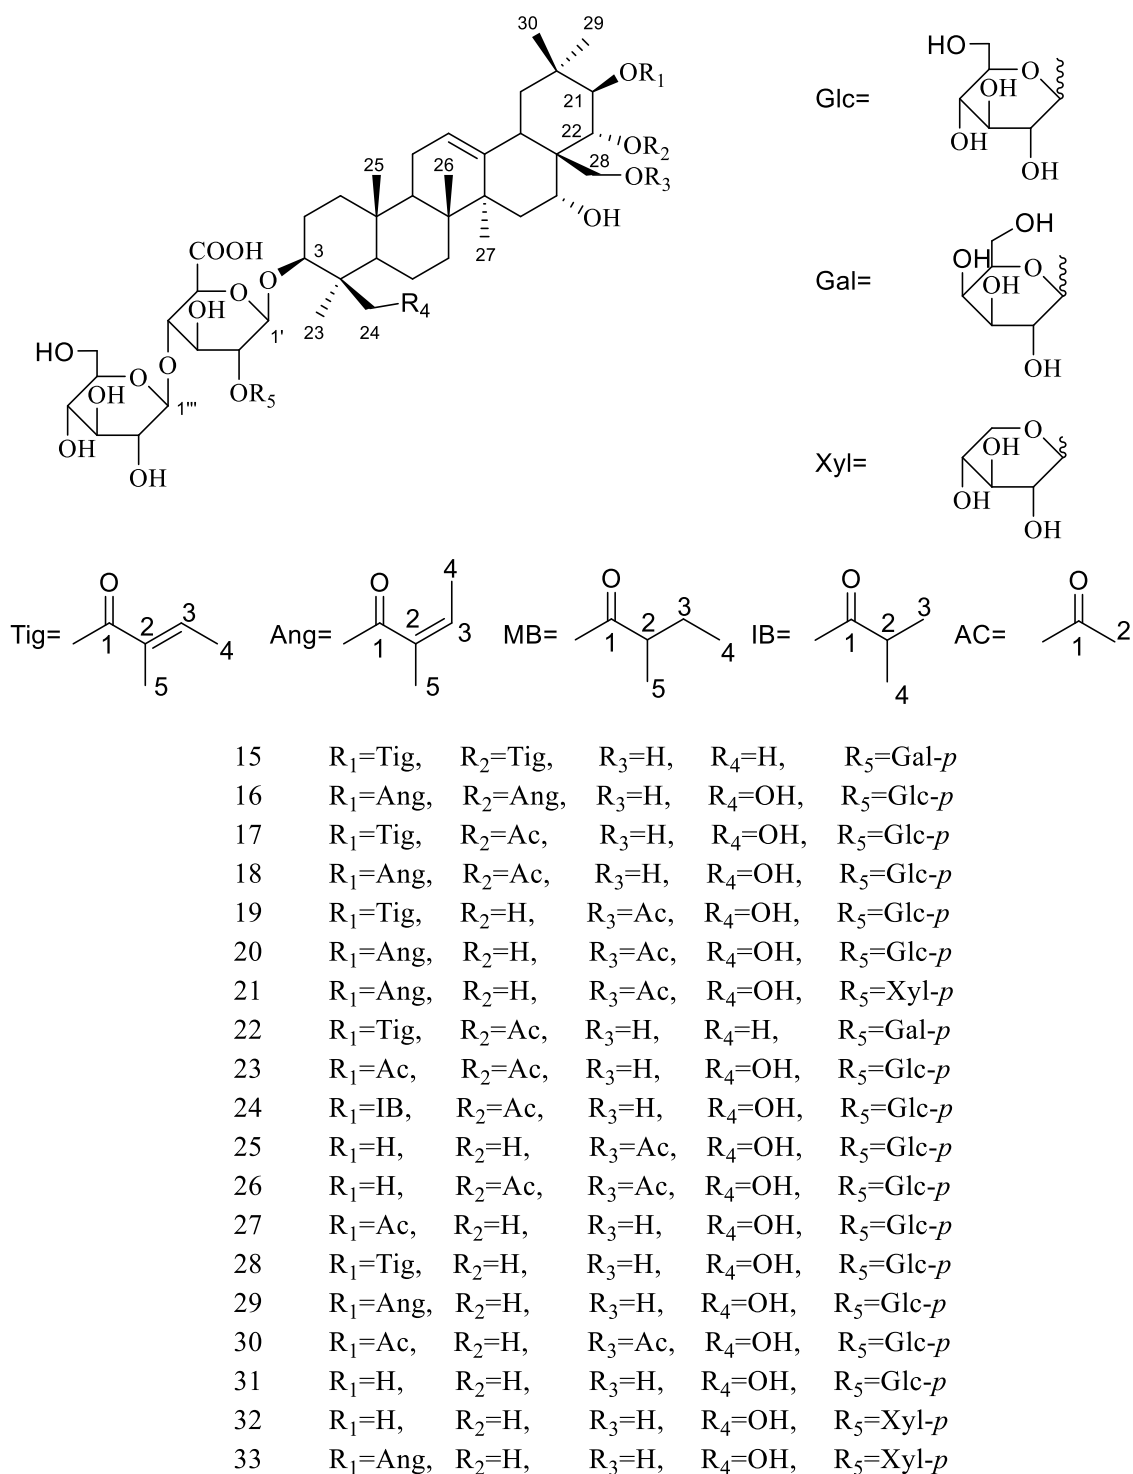

**S100.** The structures of compounds **15-33**

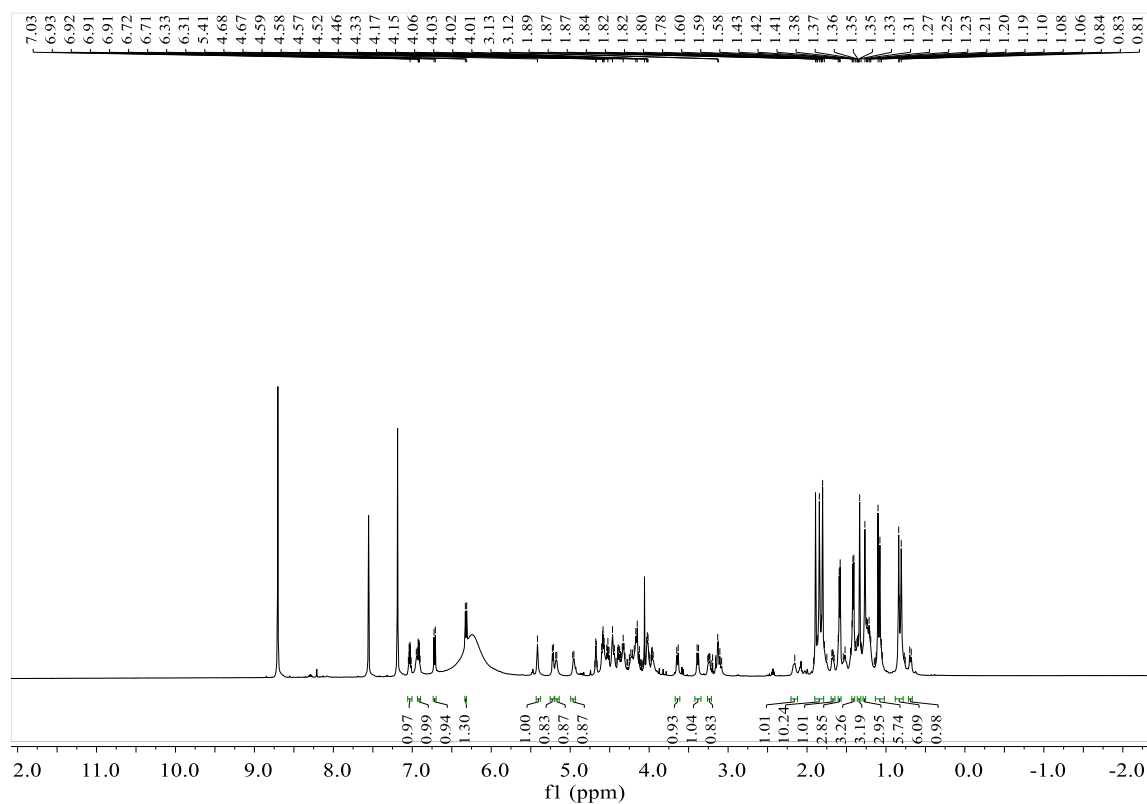

**S101.** <sup>1</sup>H NMR Spectrum (600 MHz, Pyridine-*d*<sub>5</sub>) of the new compound **15**

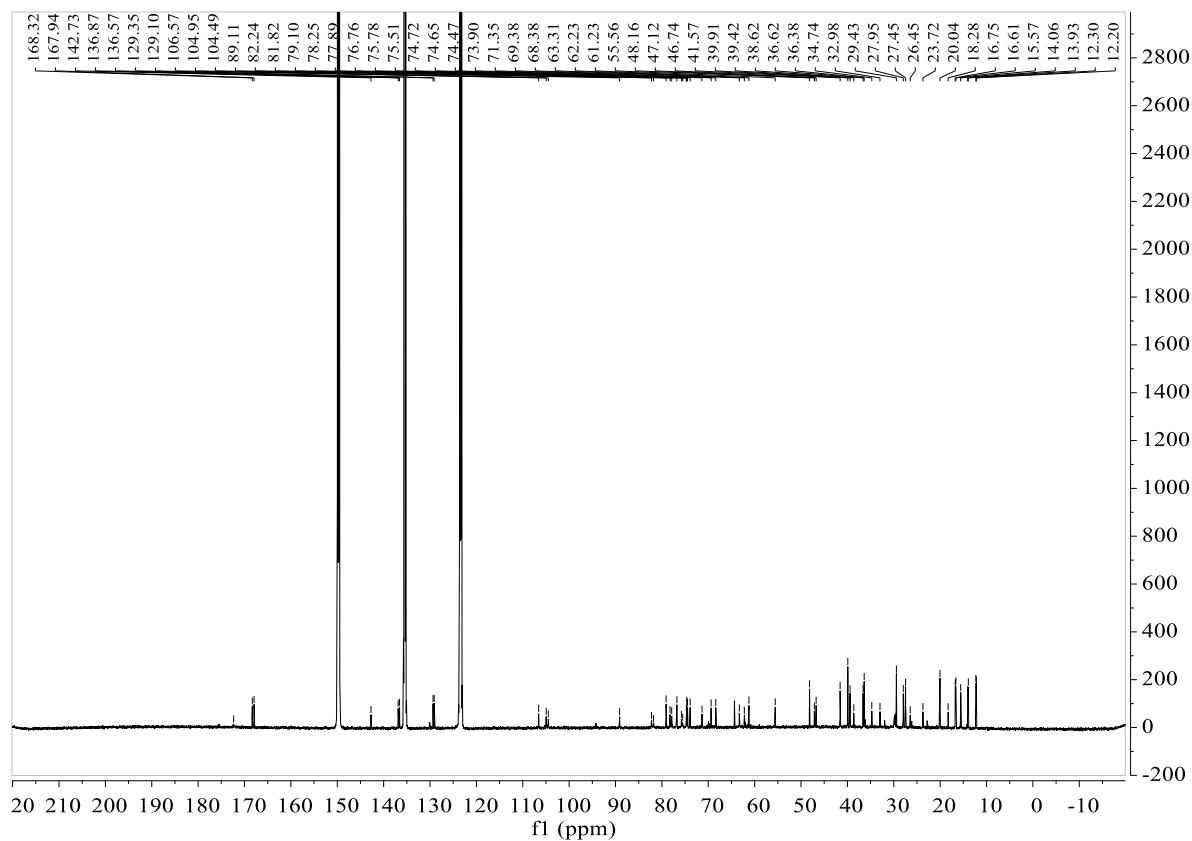

**S102.** <sup>13</sup>C NMR Spectrum (150 MHz, Pyridine-*d*<sub>5</sub>) of the new compound **15**

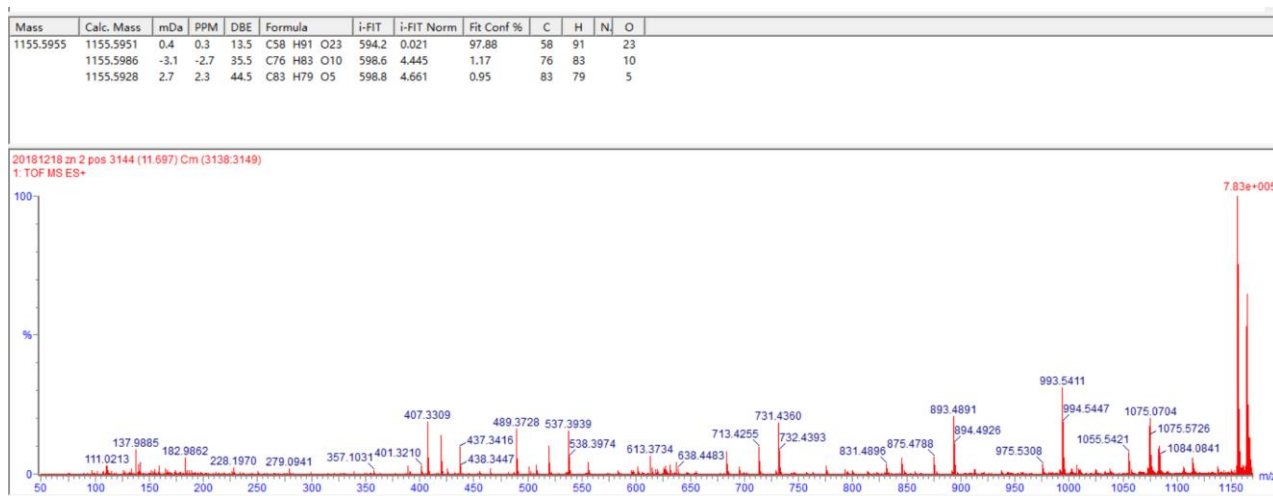

**S103.** HRESIMS spectrum of the new compound **15**

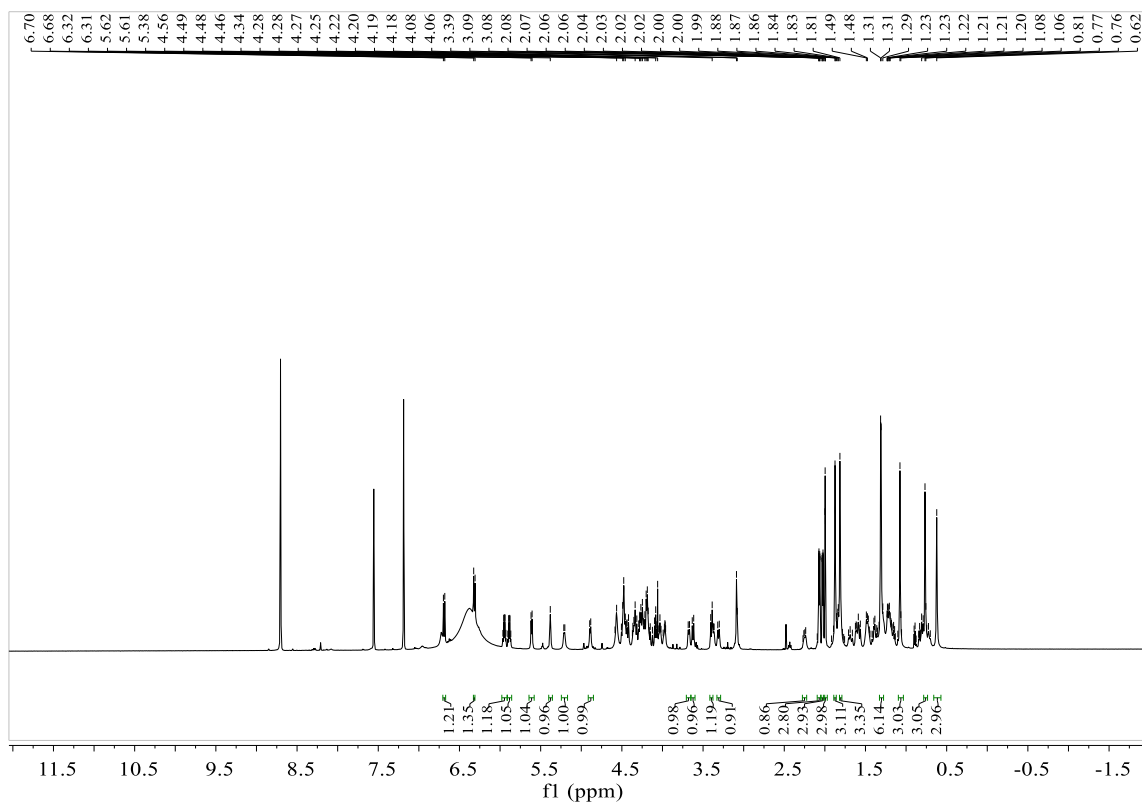

**S104.** <sup>1</sup>H NMR Spectrum (600 MHz, Pyridine-*d*<sub>5</sub>) of the new compound **16**

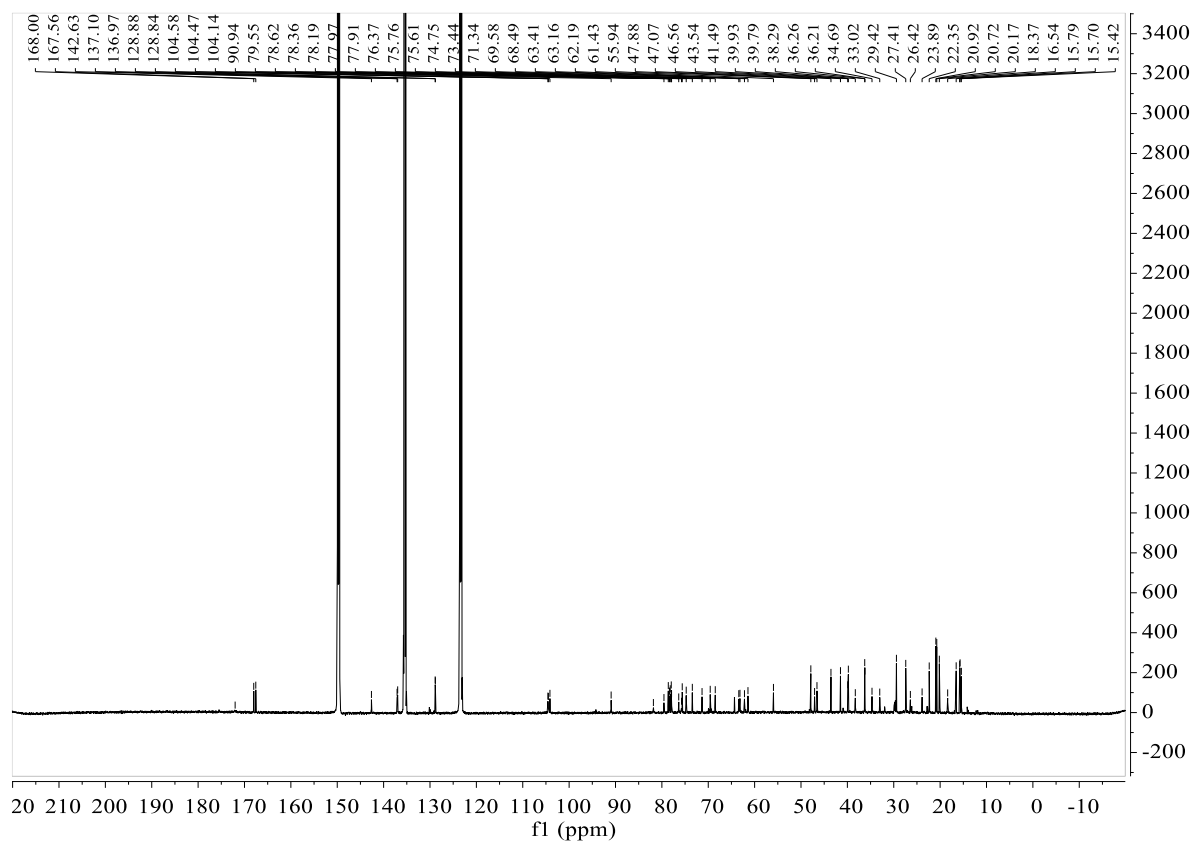

**S105.** <sup>13</sup>C NMR Spectrum (150 MHz, Pyridine-d<sub>5</sub>) of the new compound **16**

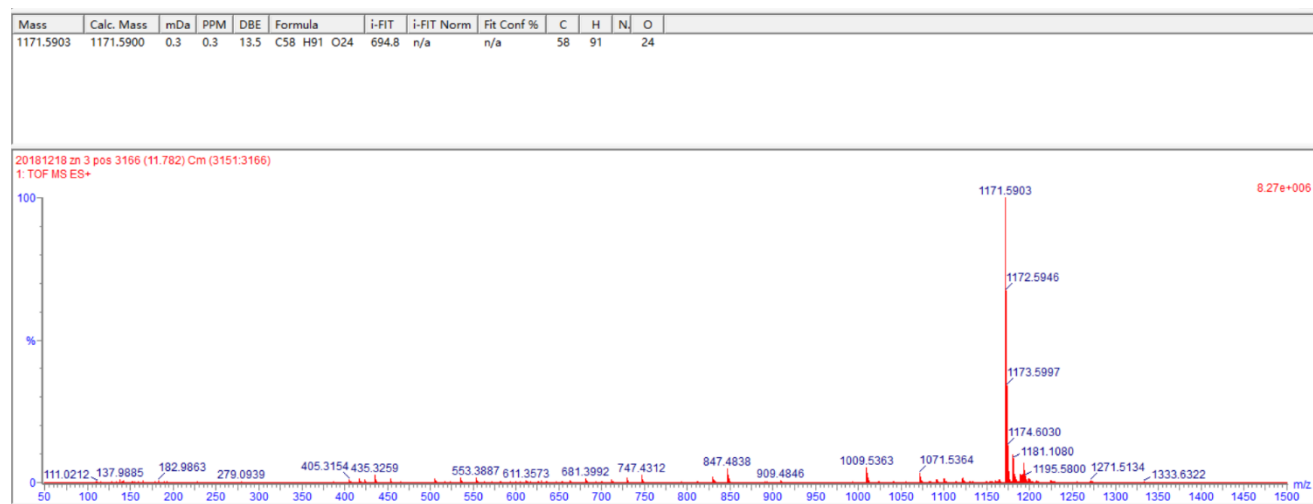

**S106.** HRESIMS spectrum of the new compound **16**

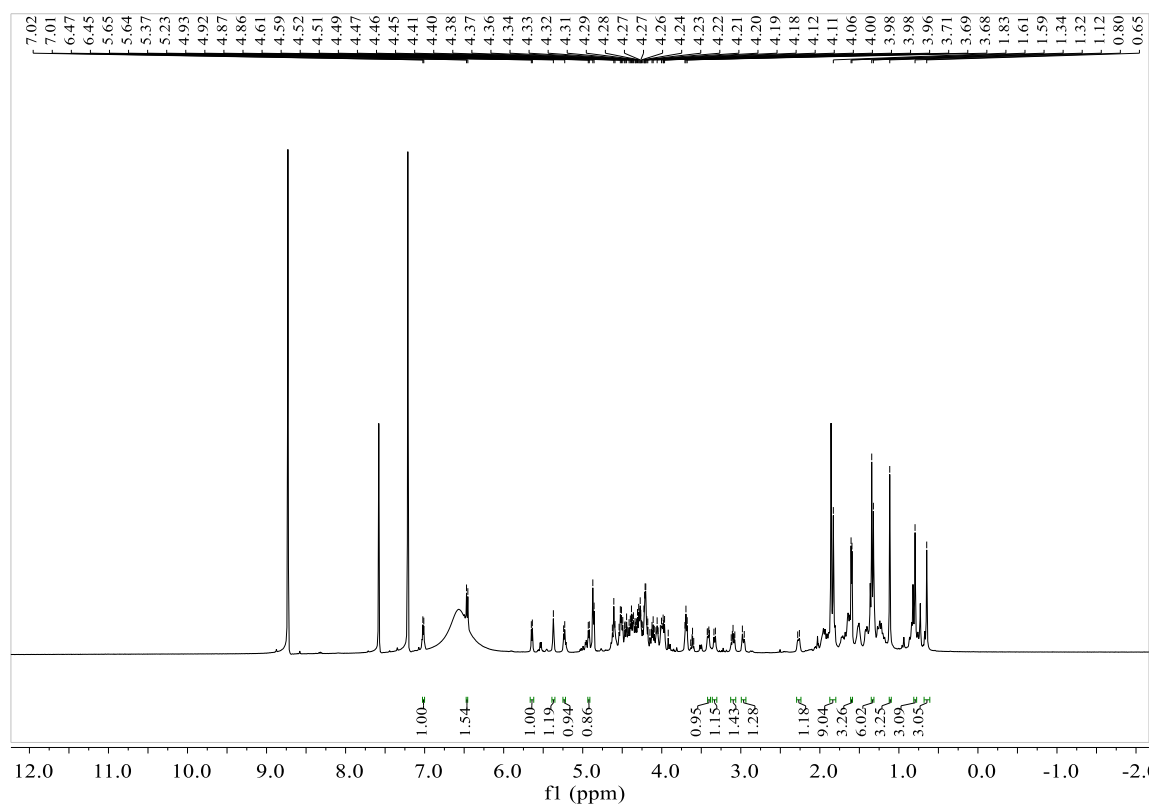

**S107.** <sup>1</sup>H NMR Spectrum (600 MHz, Pyridine-*d*<sub>5</sub>) of the new compound **17**

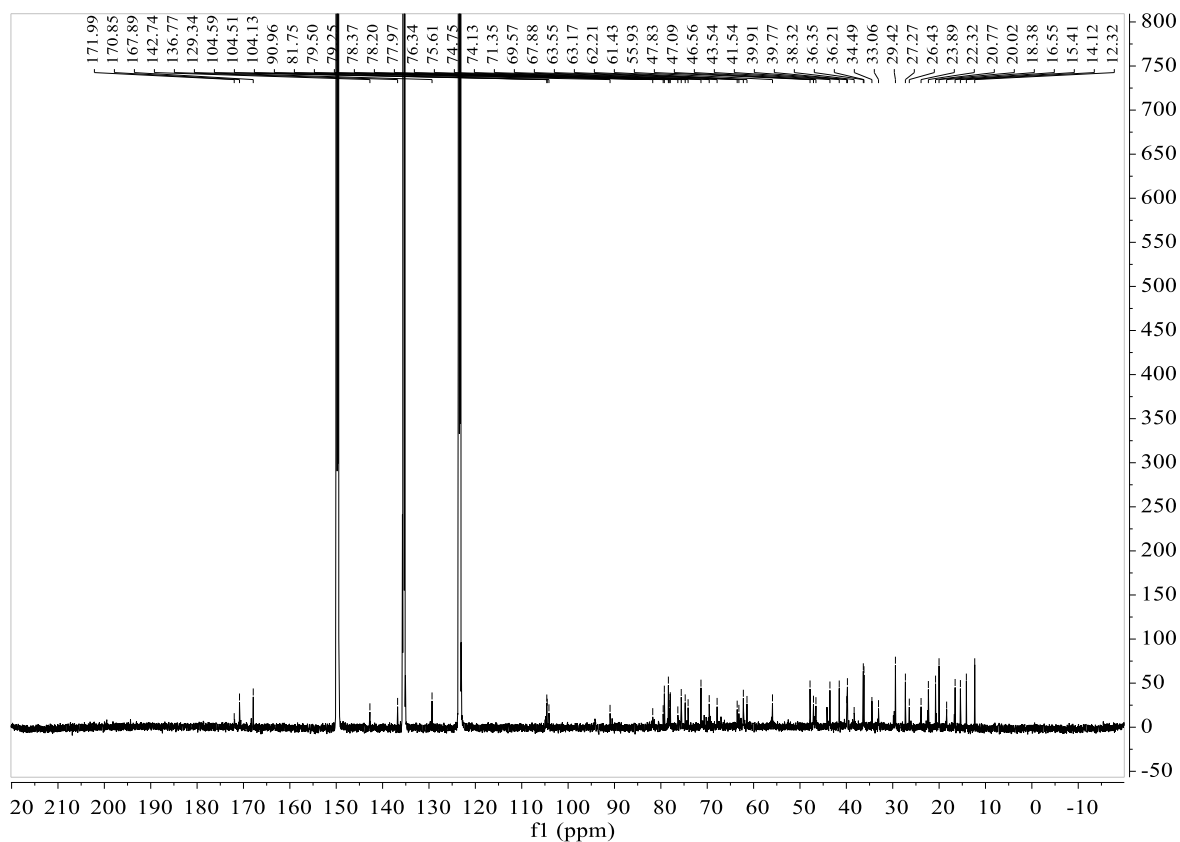

**S108.** <sup>13</sup>C NMR Spectrum (150 MHz, Pyridine-*d*<sub>5</sub>) of the new compound **17**

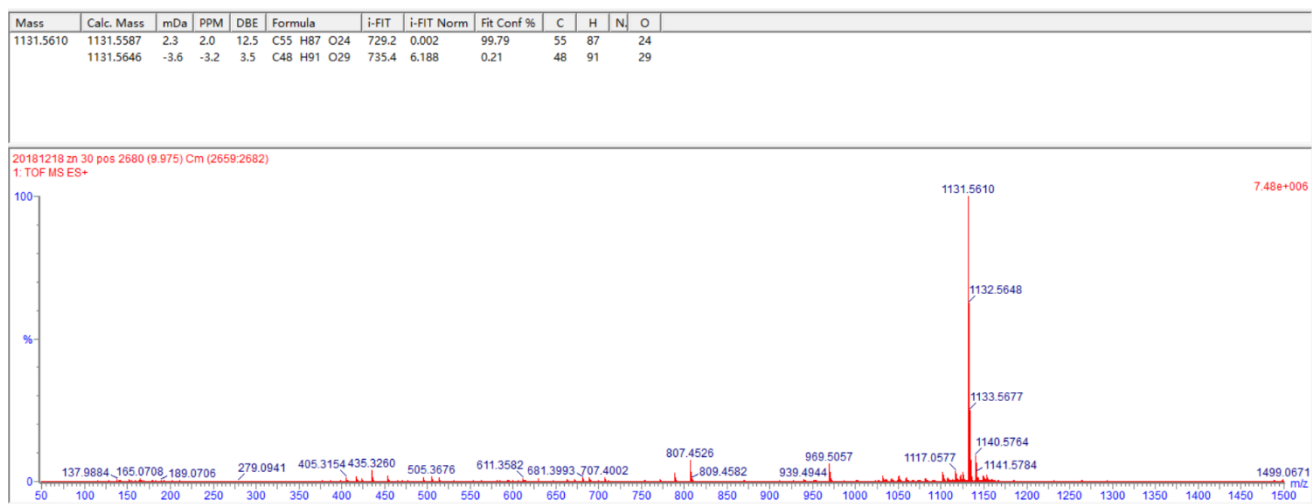

**S109.** HRESIMS spectrum of the new compound **17**

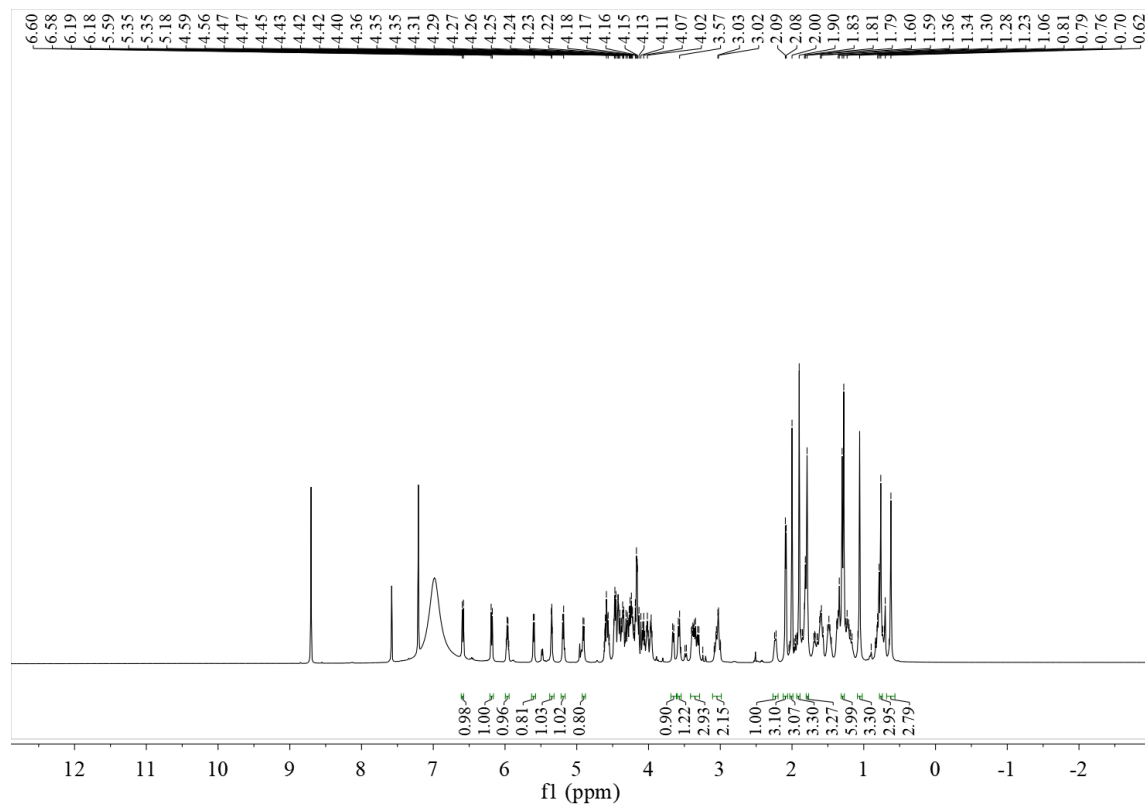

**S110.** <sup>1</sup>H NMR Spectrum (600 MHz, Pyridine-*d*<sub>5</sub>) of the new compound **18**



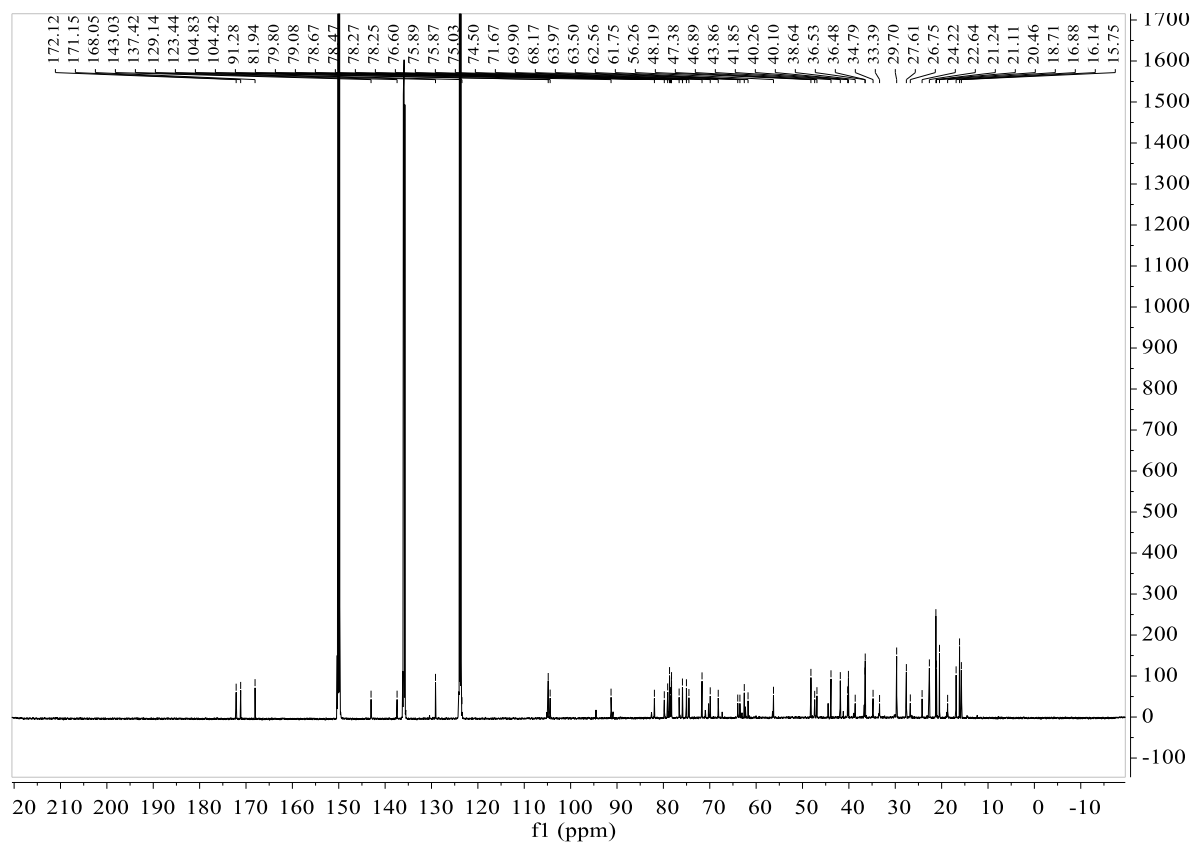

**S111.**  $^{13}\text{C}$  NMR Spectrum (150 MHz, Pyridine- $d_5$ ) of the new compound **18**

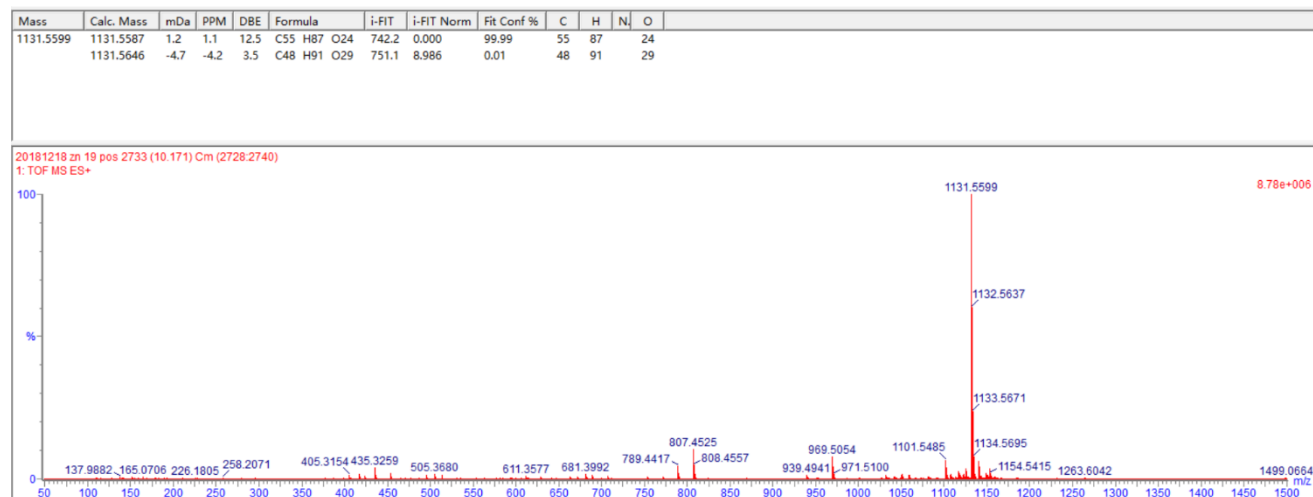

**S112.** HRESIMS spectrum of the new compound **18**

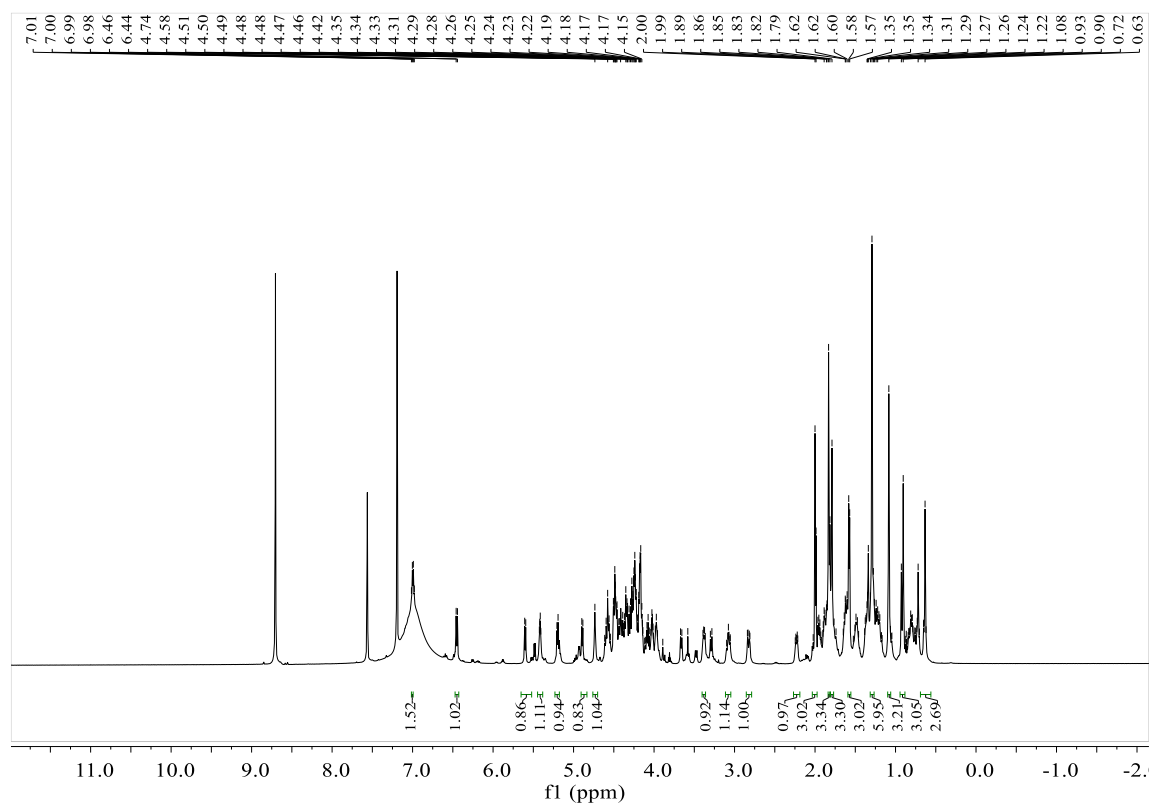

**S113.** <sup>1</sup>H NMR Spectrum (600 MHz, Pyridine-*d*<sub>5</sub>) of the new compound **19**

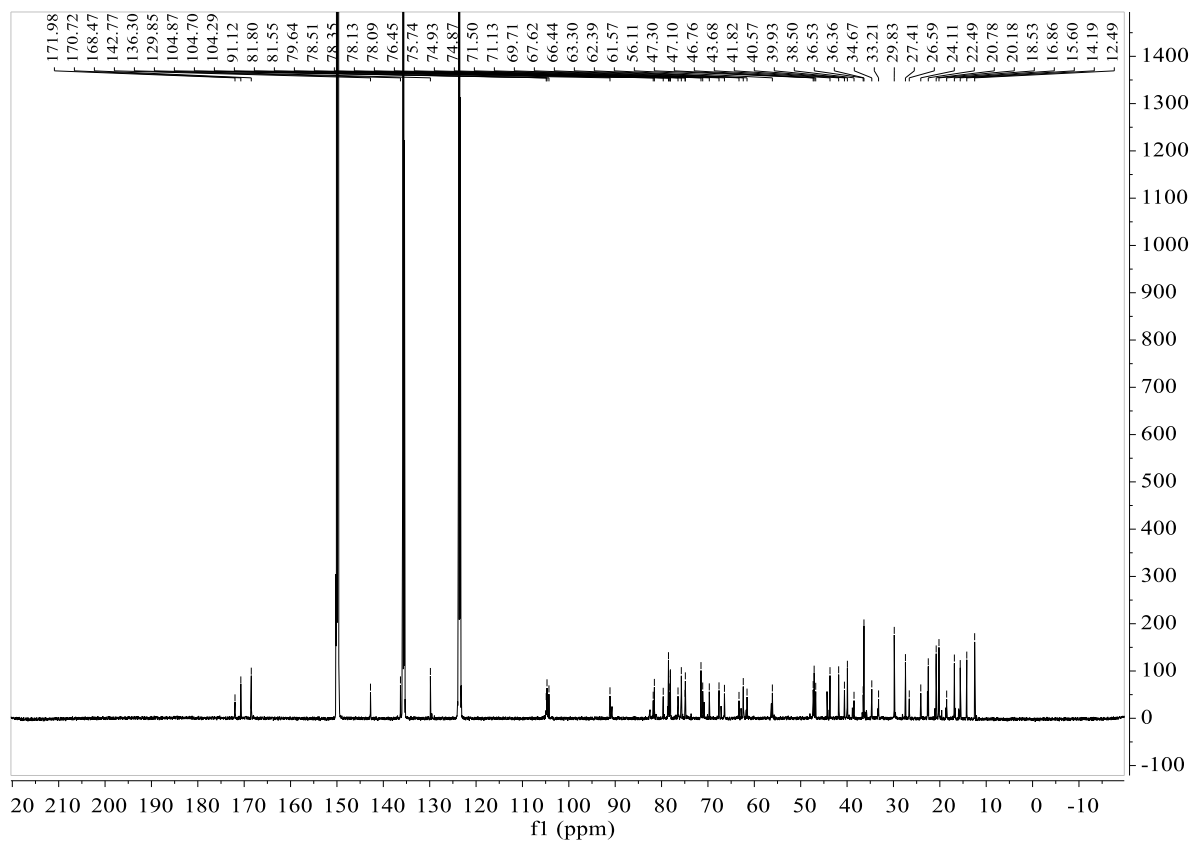

**S114.** <sup>13</sup>C NMR Spectrum (150 MHz, Pyridine-*d*<sub>5</sub>) of the new compound **19**

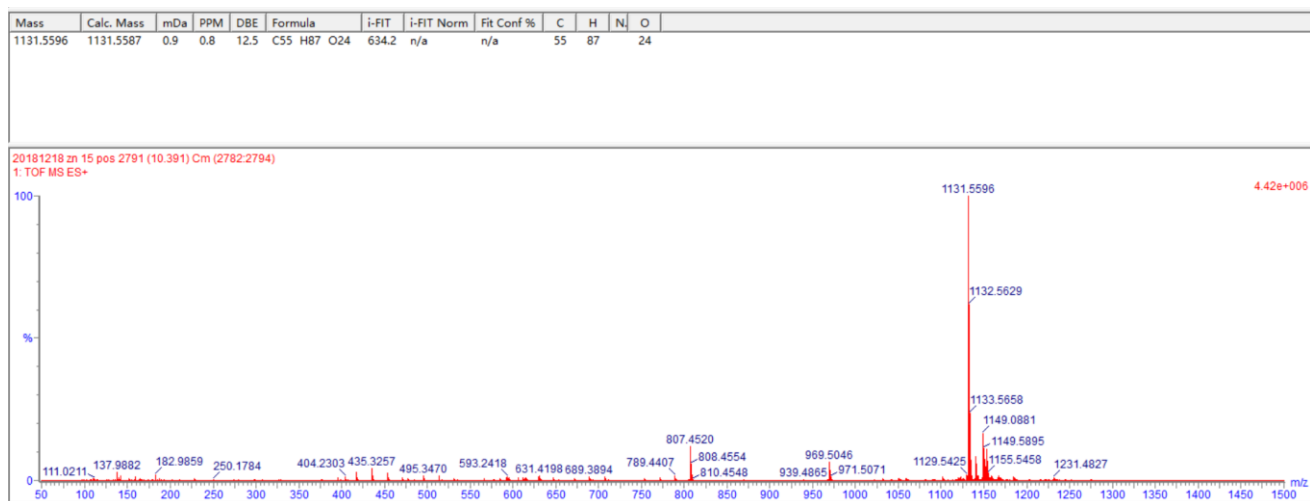

**S115.** HRESIMS spectrum of the new compound **19**

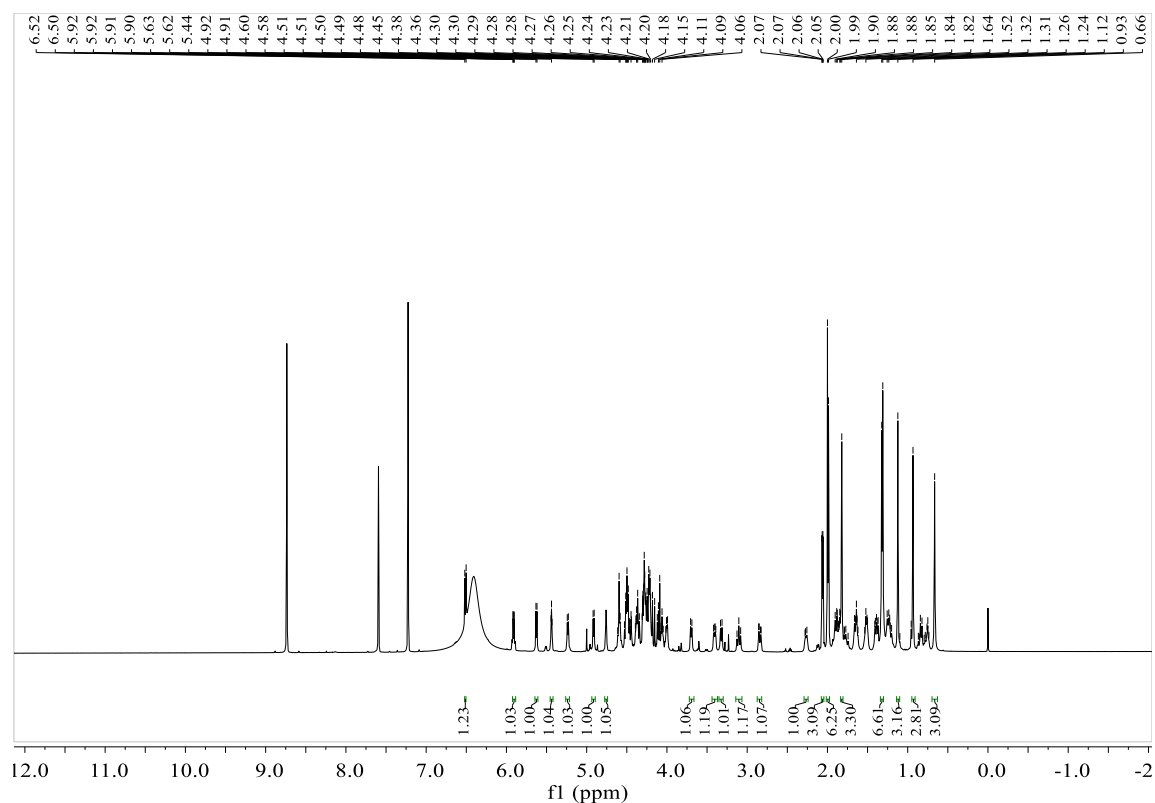

**S116.** <sup>1</sup>H NMR Spectrum (600 MHz, Pyridine-*d*<sub>5</sub>) of the new compound **20**

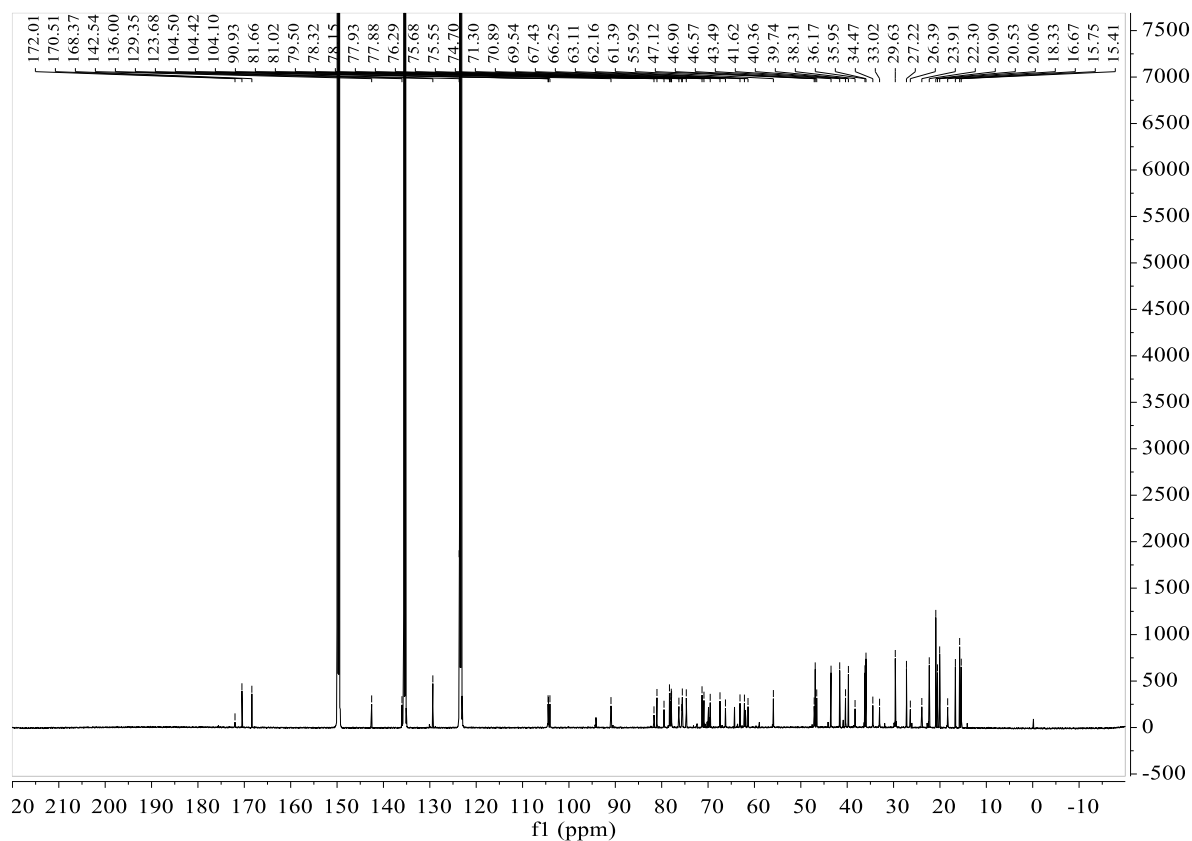

**S117.**  $^{13}\text{C}$  NMR Spectrum (150 MHz, Pyridine- $d_5$ ) of the new compound **20**

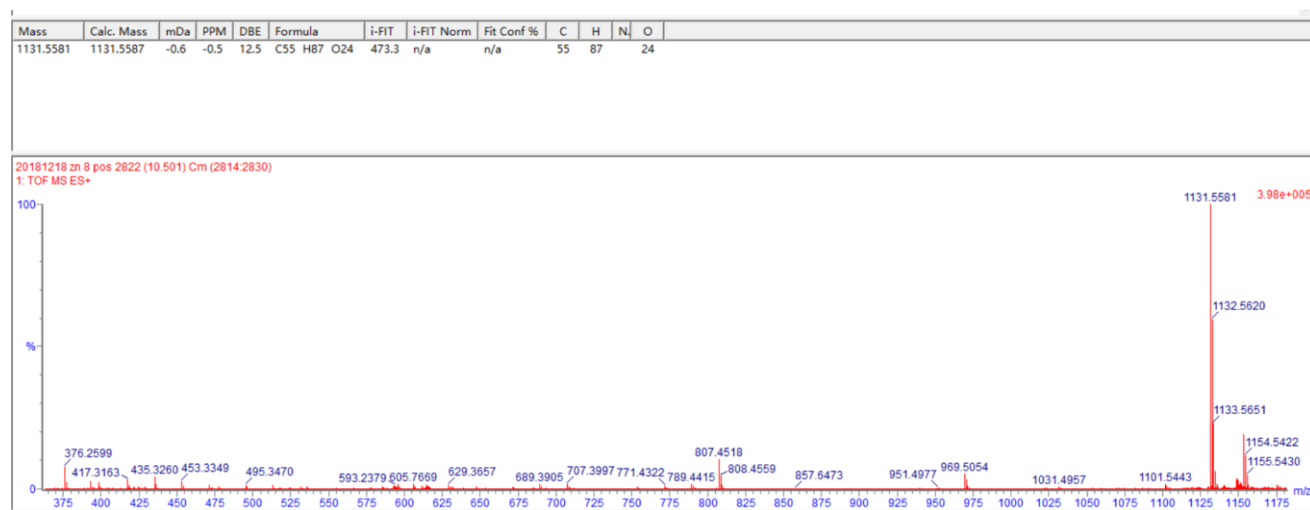

**S118.** HRESIMS spectrum of the new compound **20**

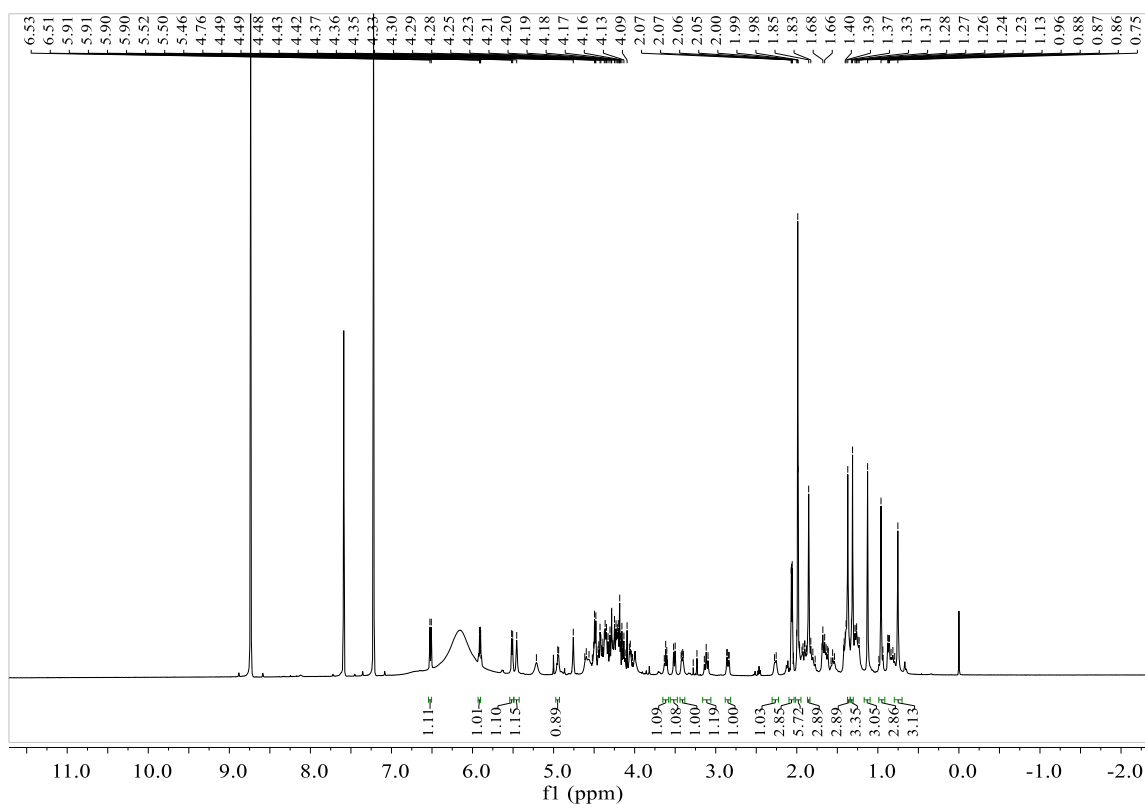

**S119.** <sup>1</sup>H NMR Spectrum (600 MHz, Pyridine-*d*<sub>5</sub>) of the new compound **21**

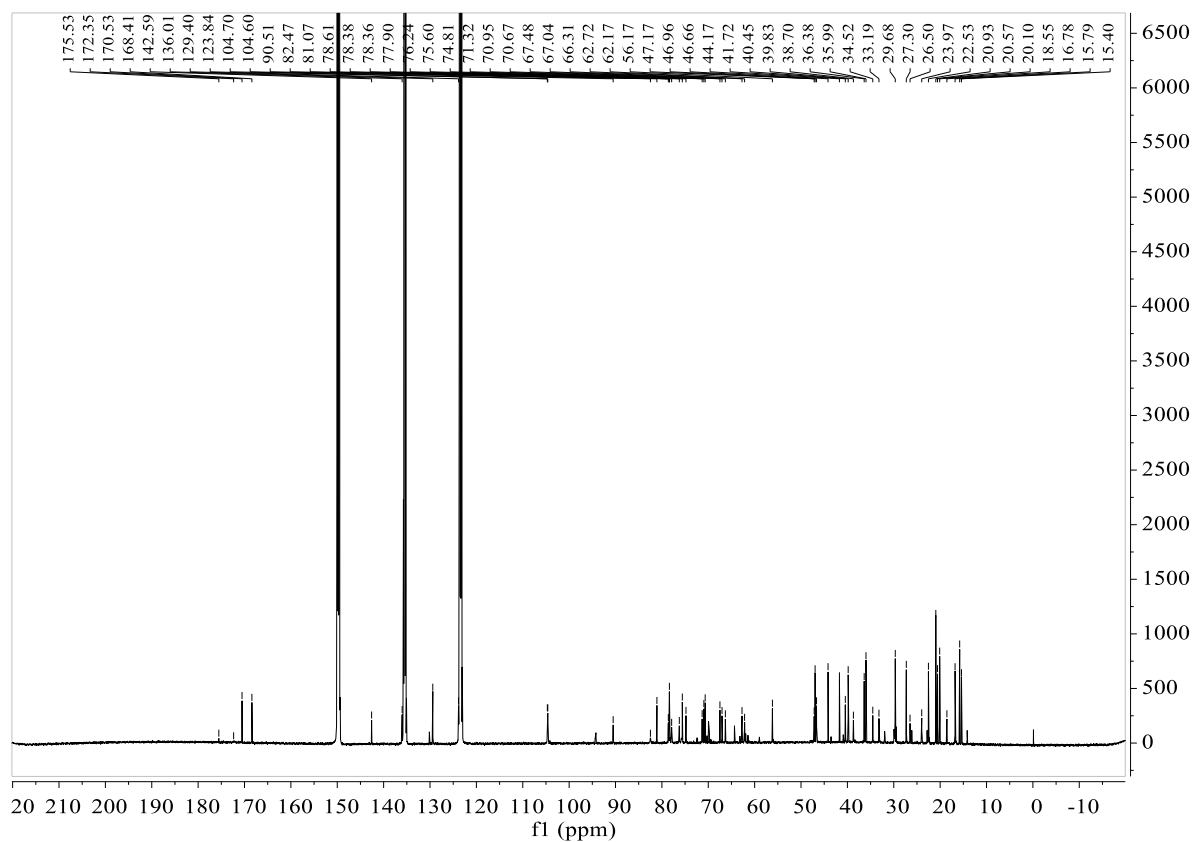

**S120.** <sup>13</sup>C NMR Spectrum (150 MHz, Pyridine-*d*<sub>5</sub>) of the new compound **21**

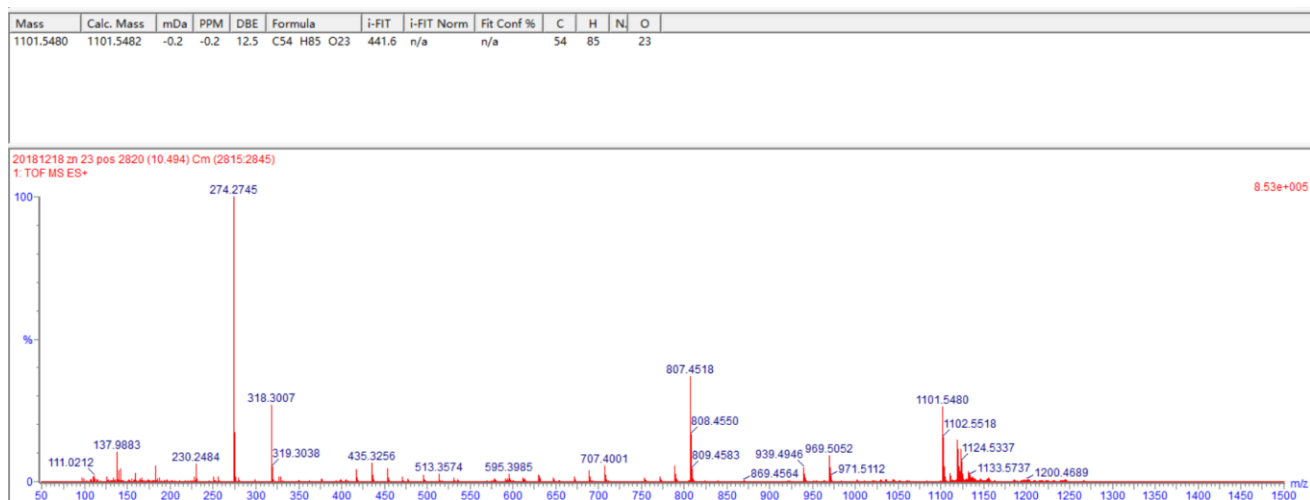

**S121.** HRESIMS spectrum of the new compound **21**

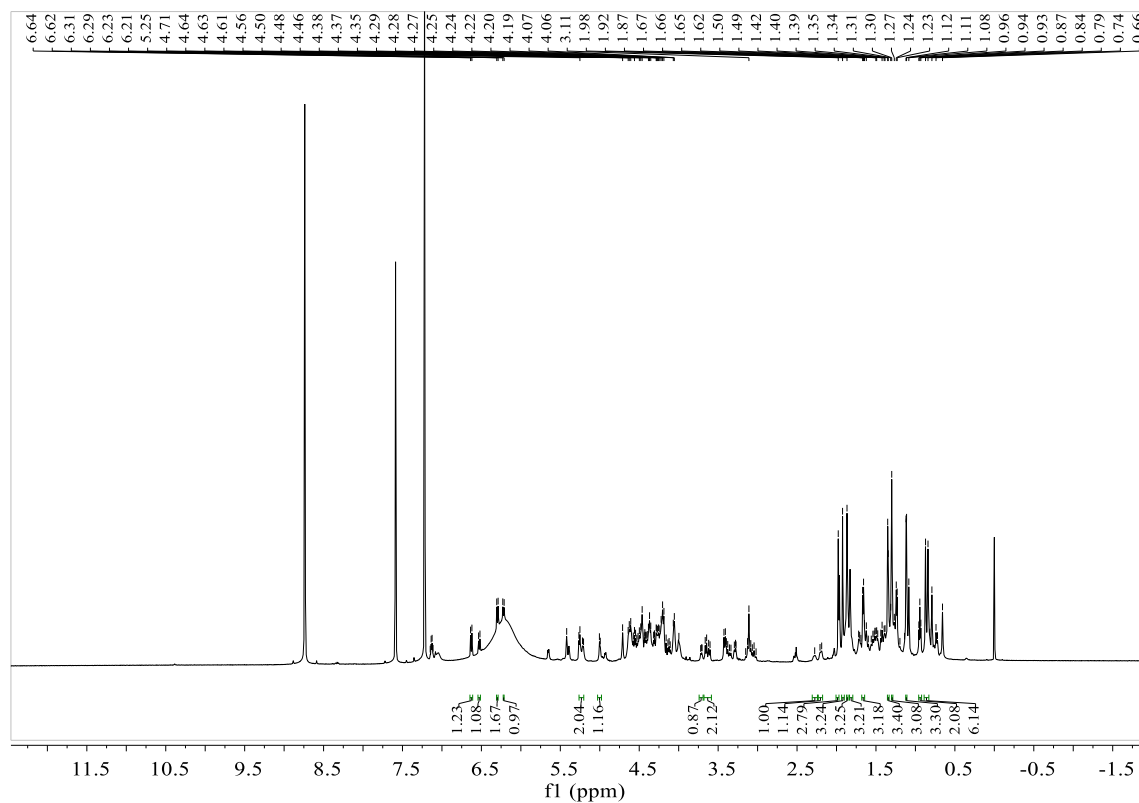

**S122.** <sup>1</sup>H NMR Spectrum (600 MHz, Pyridine-*d*<sub>5</sub>) of the new compound **22**

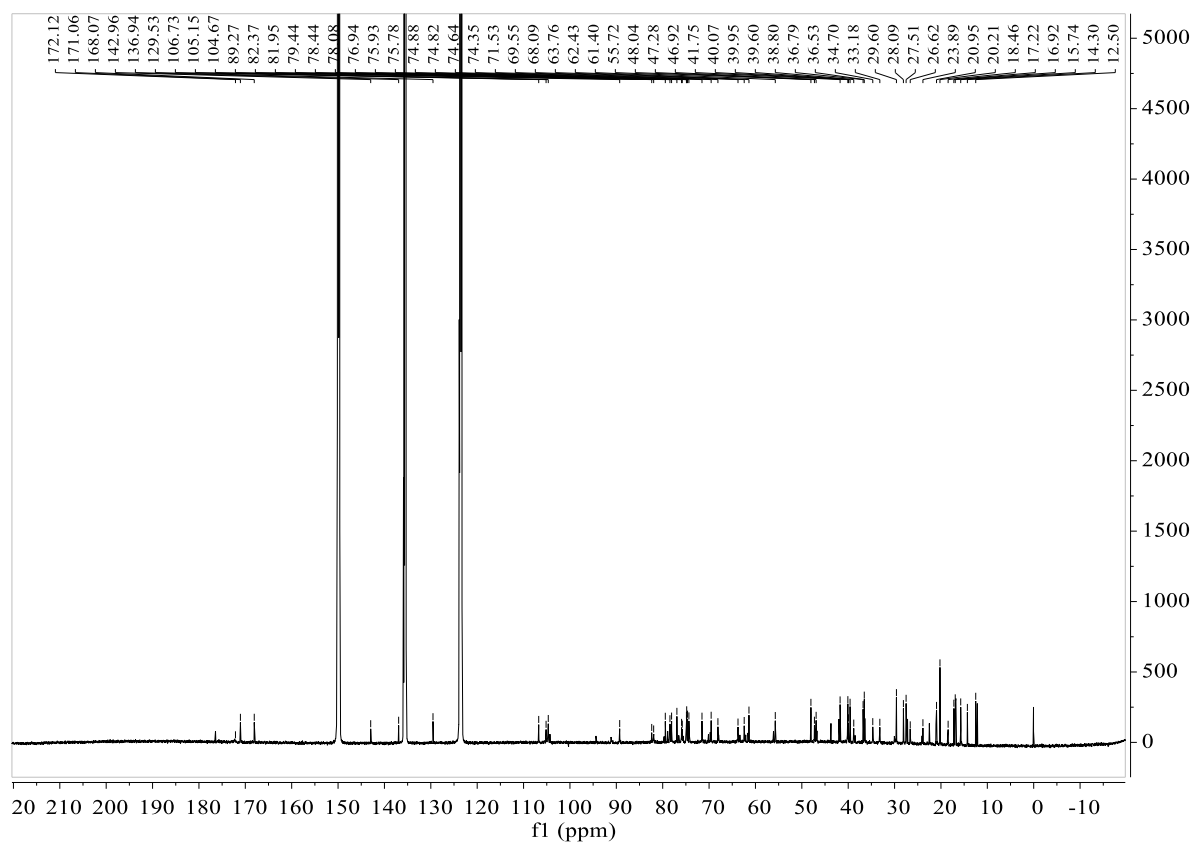

**S123.**  $^{13}\text{C}$  NMR Spectrum (150 MHz, Pyridine- $d_5$ ) of the new compound **22**

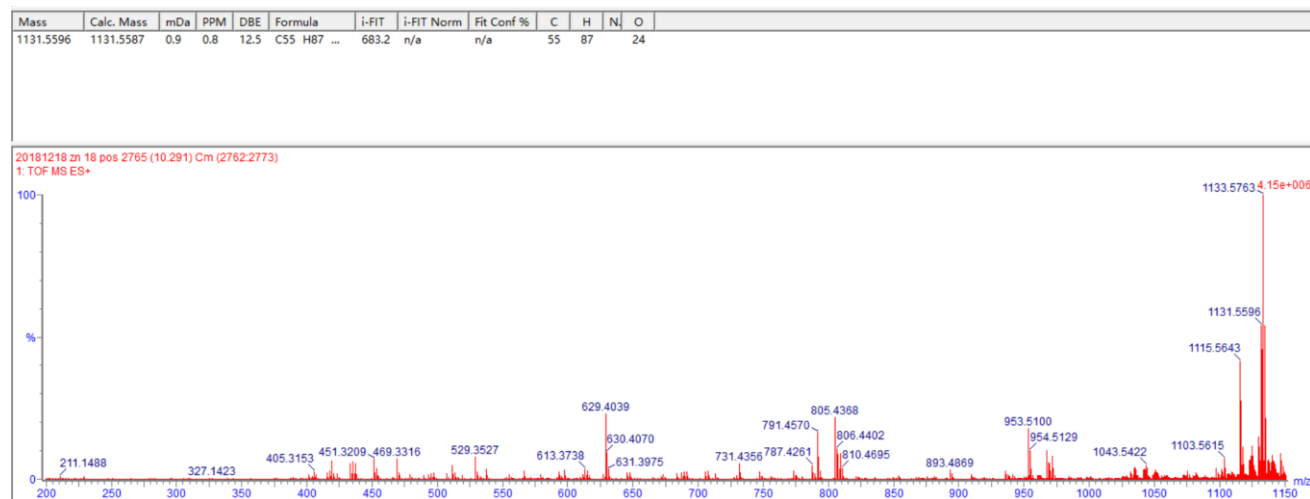

**S124.** HRESIMS spectrum of the new compound **22**

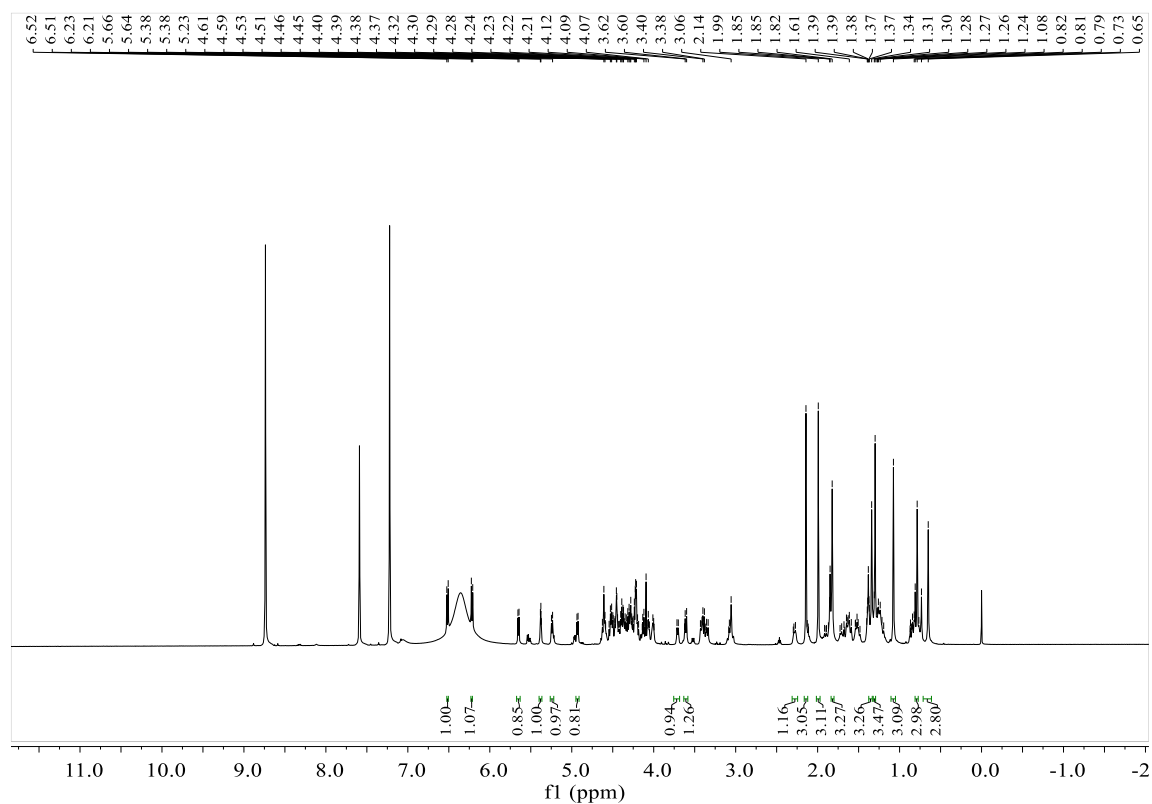

**S125.** <sup>1</sup>H NMR Spectrum (600 MHz, Pyridine-*d*<sub>5</sub>) of the new compound **23**

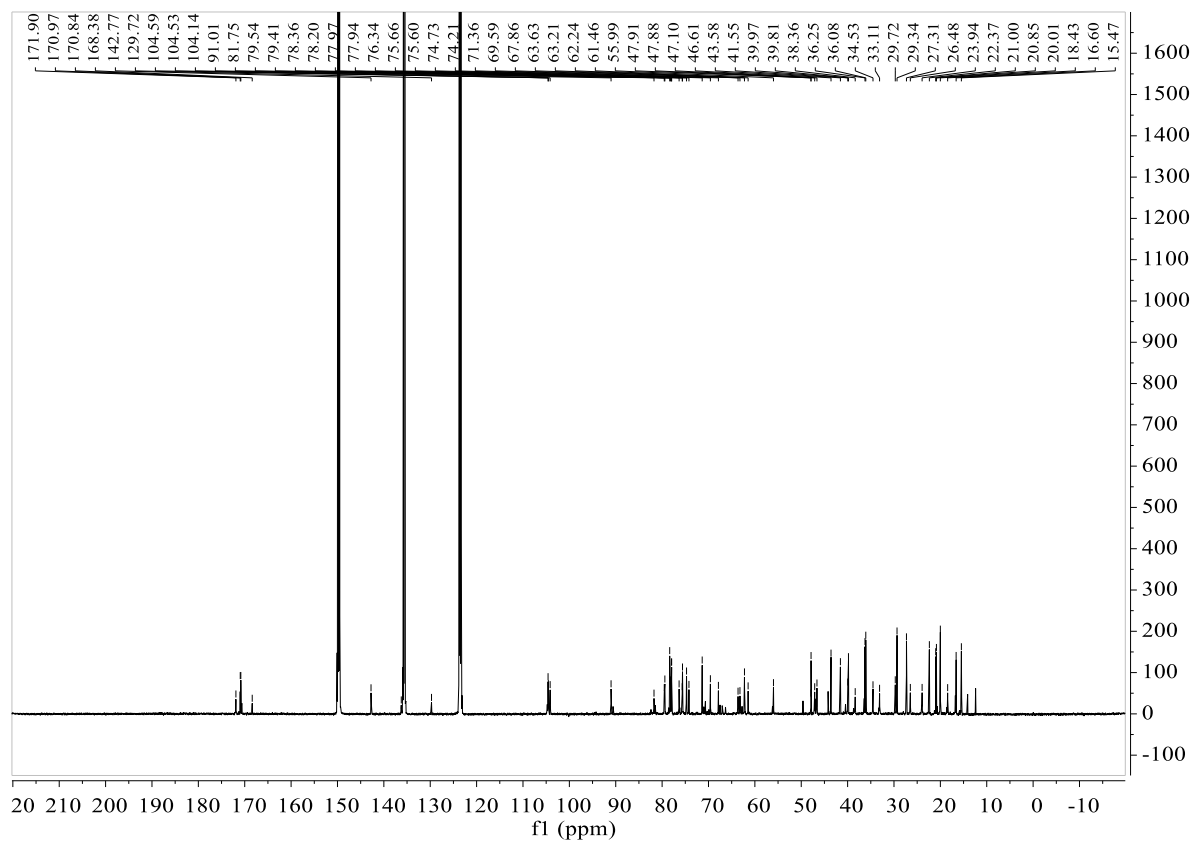

**S126.** <sup>13</sup>C NMR Spectrum (150 MHz, Pyridine-*d*<sub>5</sub>) of the new compound **23**



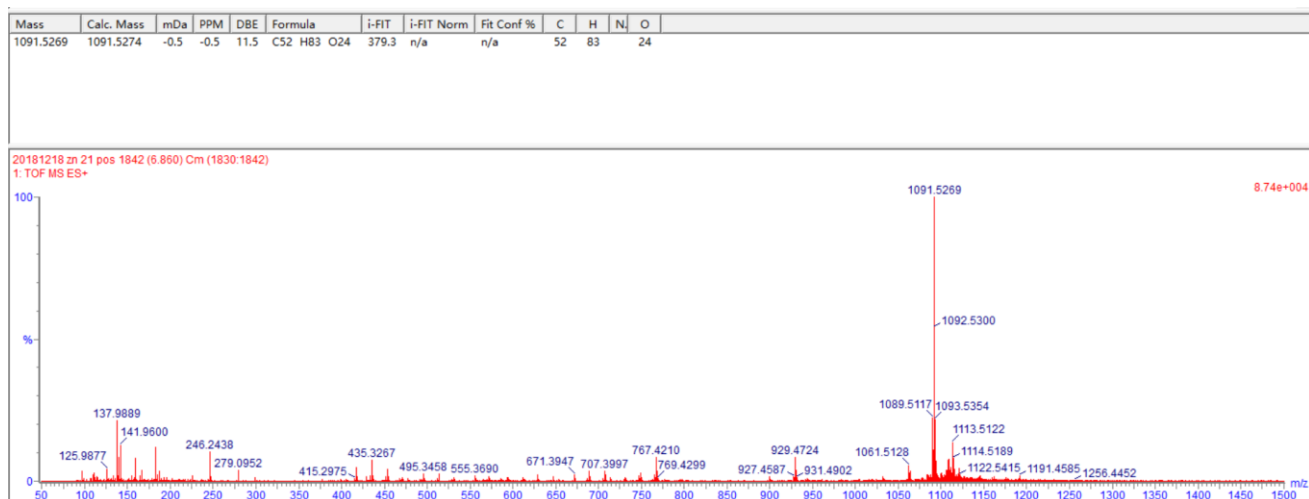

**S127.** HRESIMS spectrum of the new compound **23**

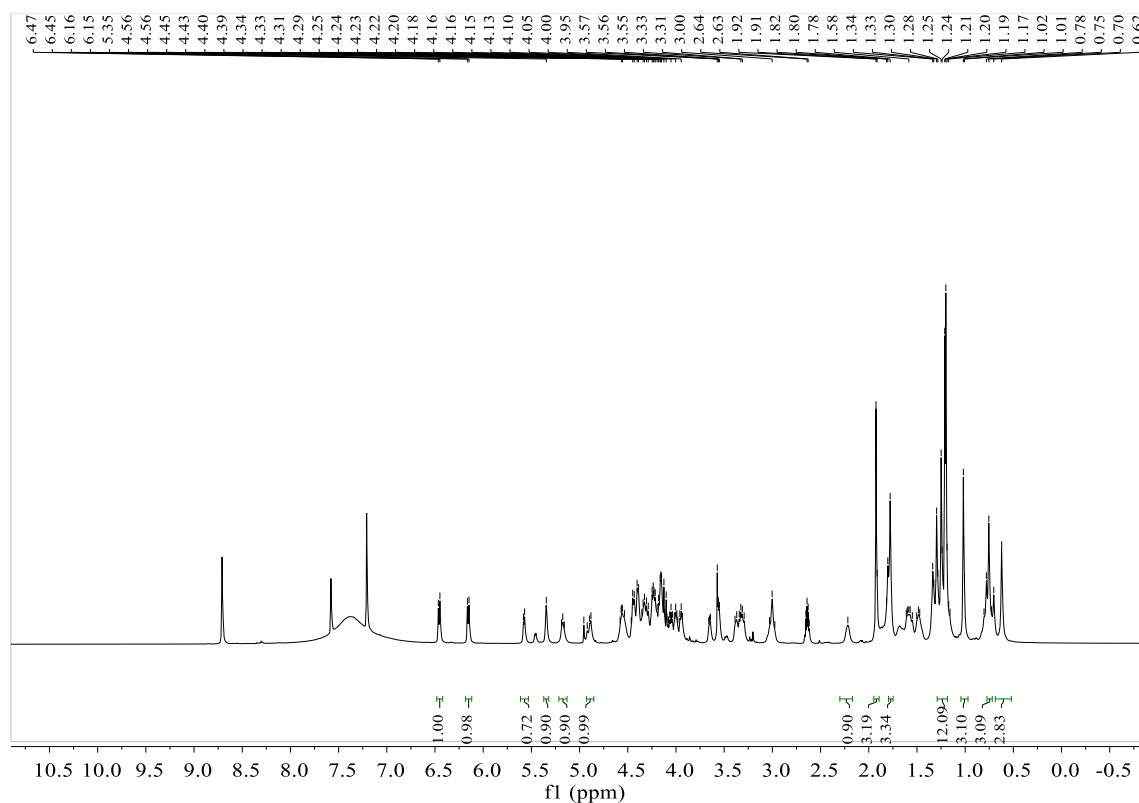

**S128.**  $^1\text{H}$  NMR Spectrum (600 MHz, Pyridine- $d_5$ ) of the new compound **24**

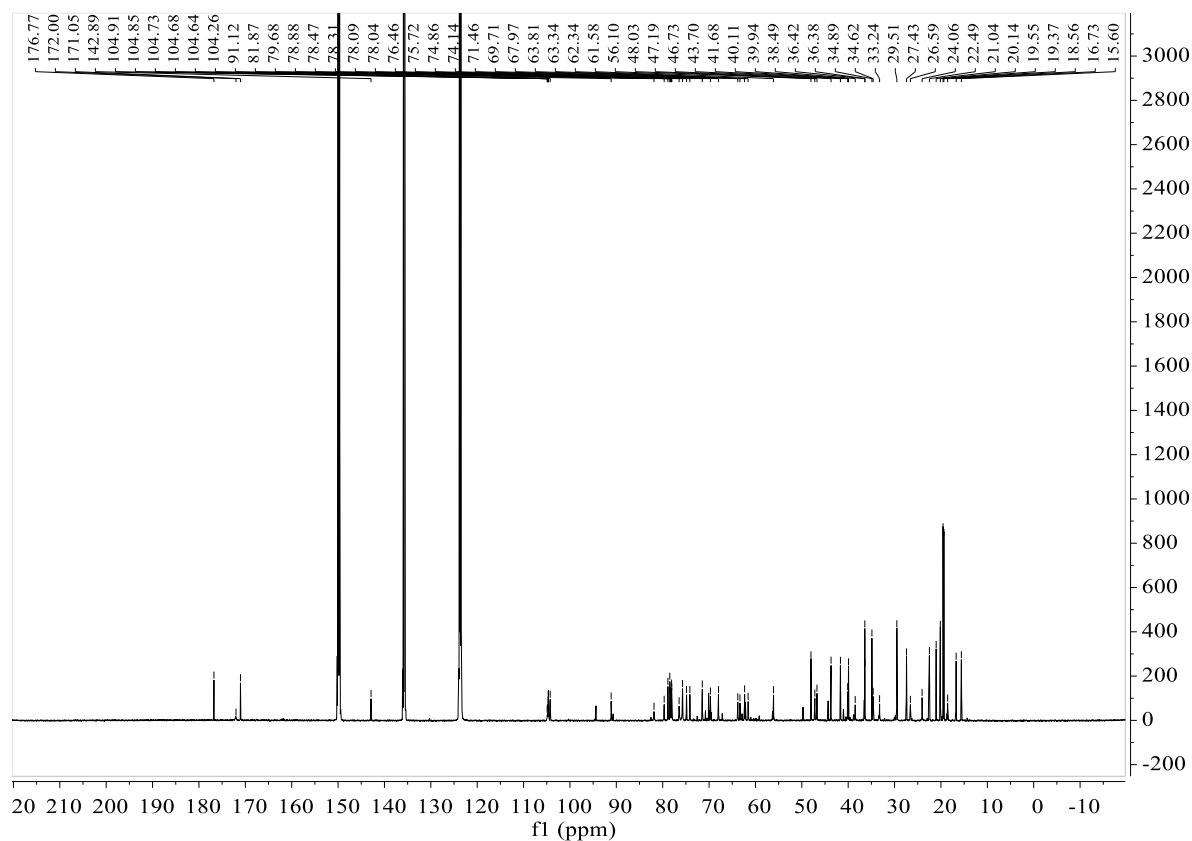

**S129.**  $^{13}\text{C}$  NMR Spectrum (150 MHz, Pyridine- $d_5$ ) of the new compound **24**

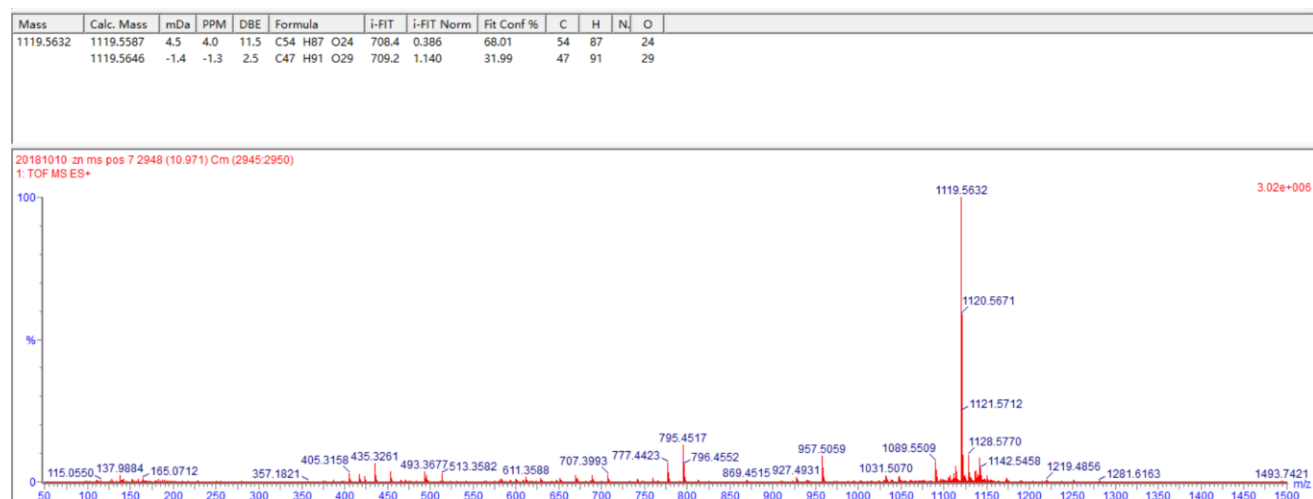

**S130.** HRESIMS spectrum of the new compound **24**

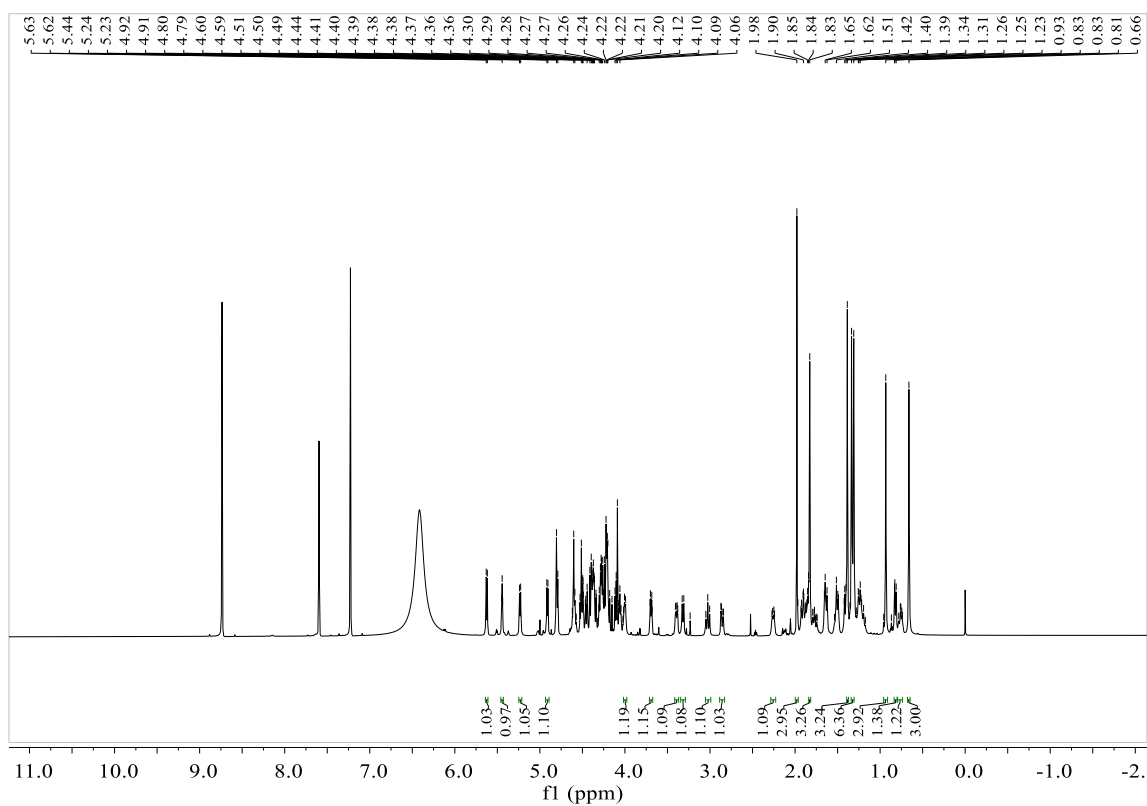

**S131.** <sup>1</sup>H NMR Spectrum (600 MHz, Pyridine-*d*<sub>5</sub>) of the new compound **25**

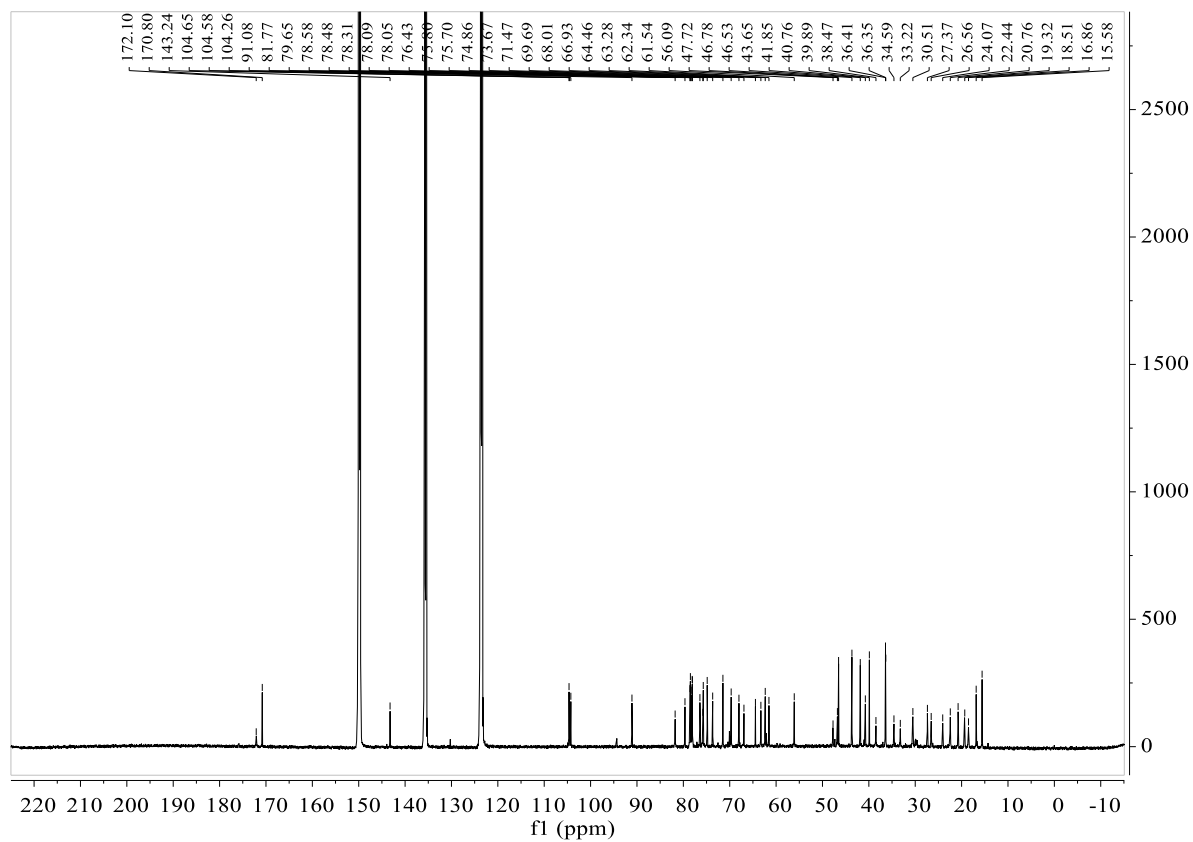

**S132.** <sup>13</sup>C NMR Spectrum (150 MHz, Pyridine-*d*<sub>5</sub>) of the new compound **25**

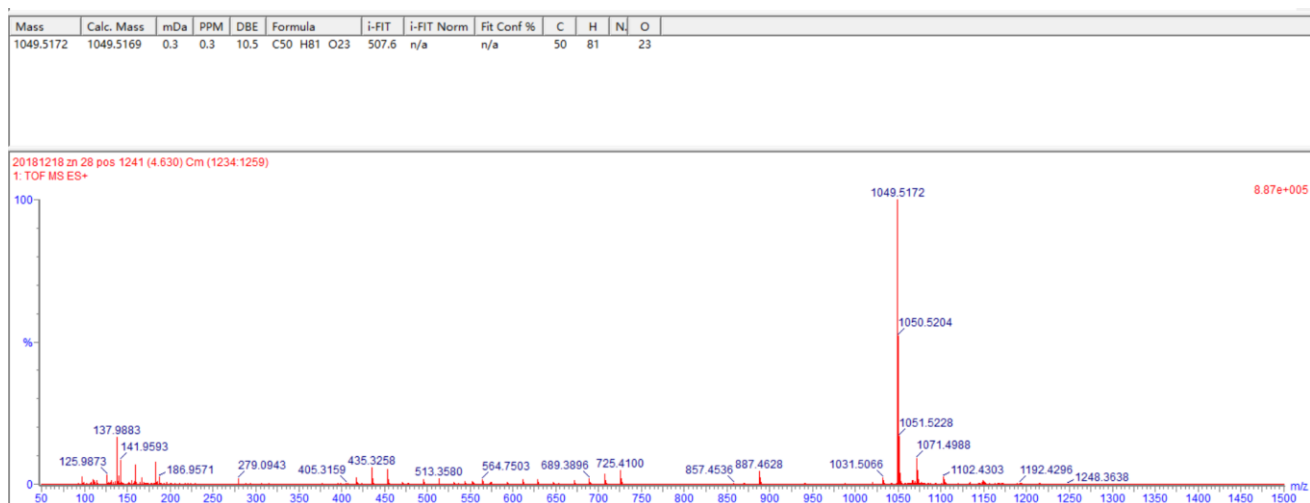

**S133.** HRESIMS spectrum of the new compound **25**

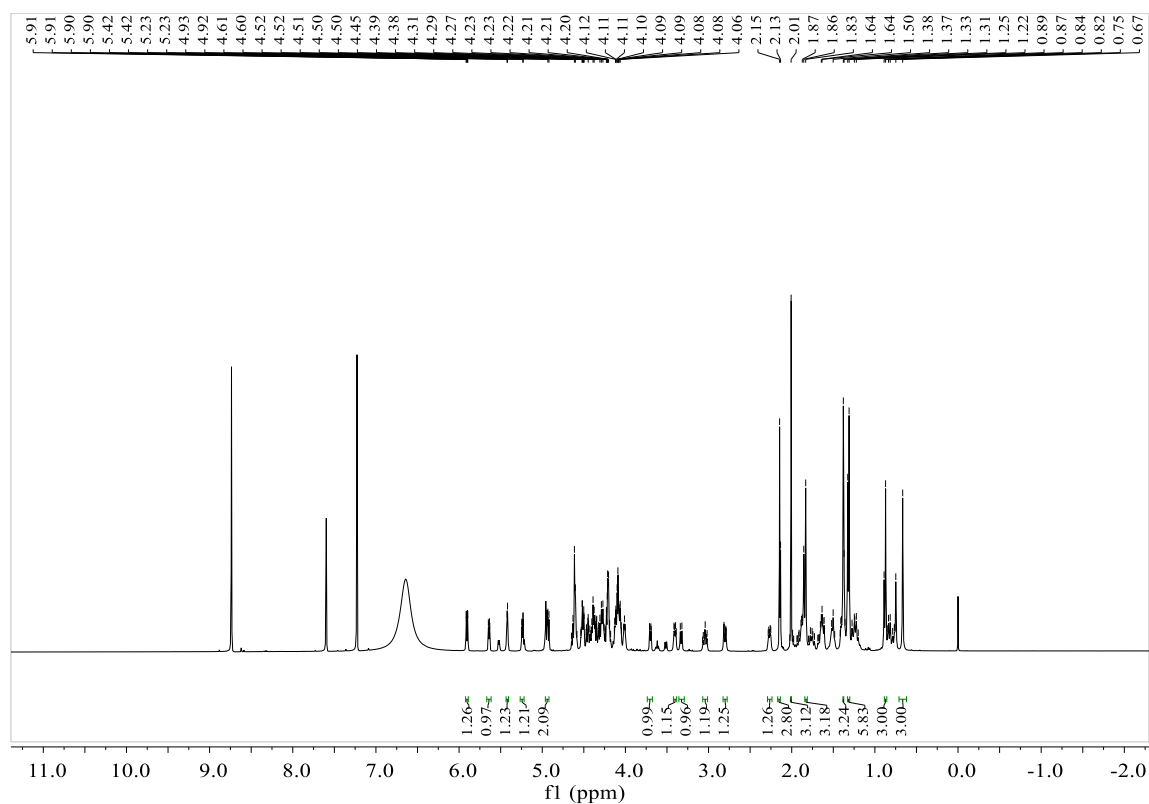

**S134.** <sup>1</sup>H NMR Spectrum (600 MHz, Pyridine-*d*<sub>5</sub>) of the new compound **26**

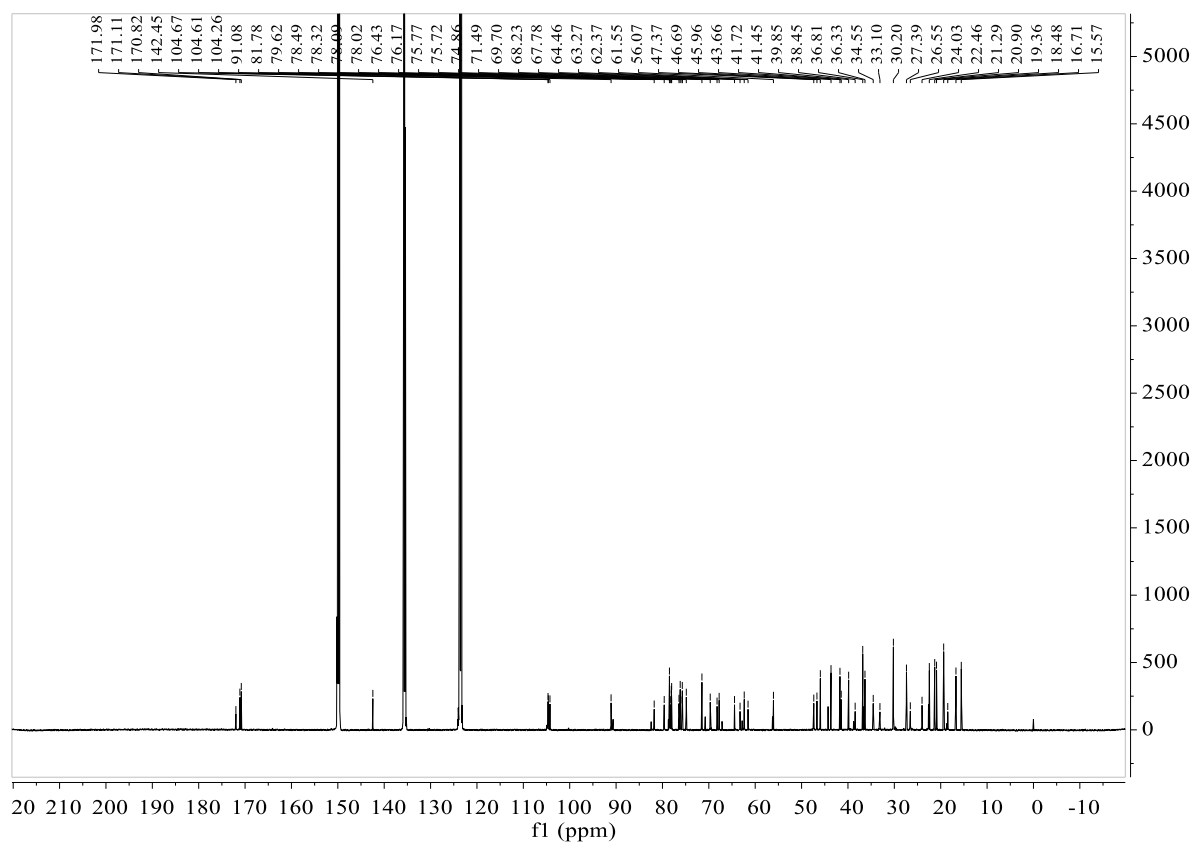

**S135.**  $^{13}\text{C}$  NMR Spectrum (150 MHz, Pyridine- $d_5$ ) of the new compound **26**

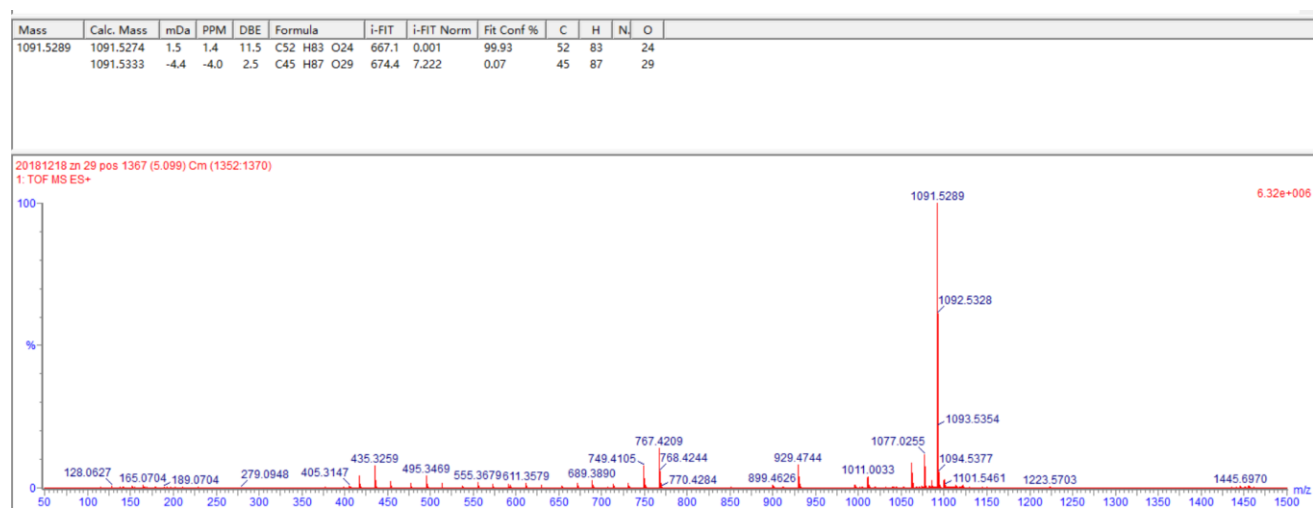

**S136.** HRESIMS spectrum of the new compound **26**

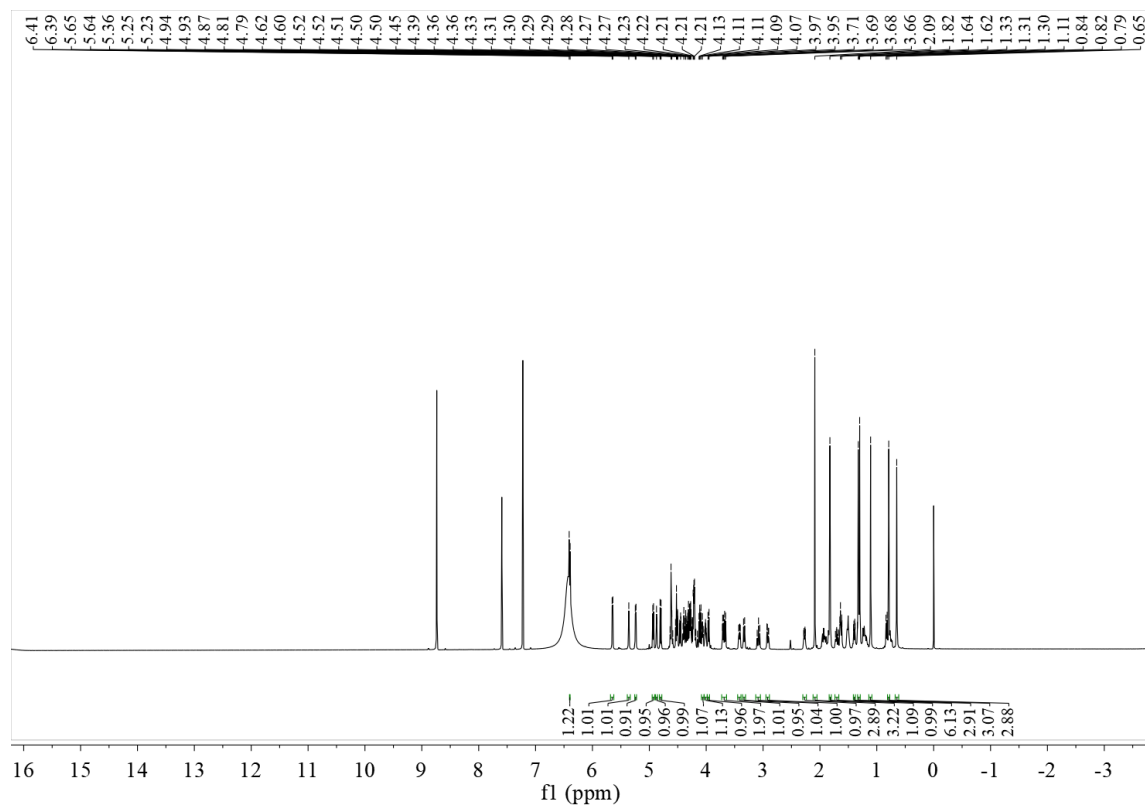

**S137.**  $^1\text{H}$  NMR Spectrum (600 MHz, Pyridine- $d_5$ ) of the new compound **27**

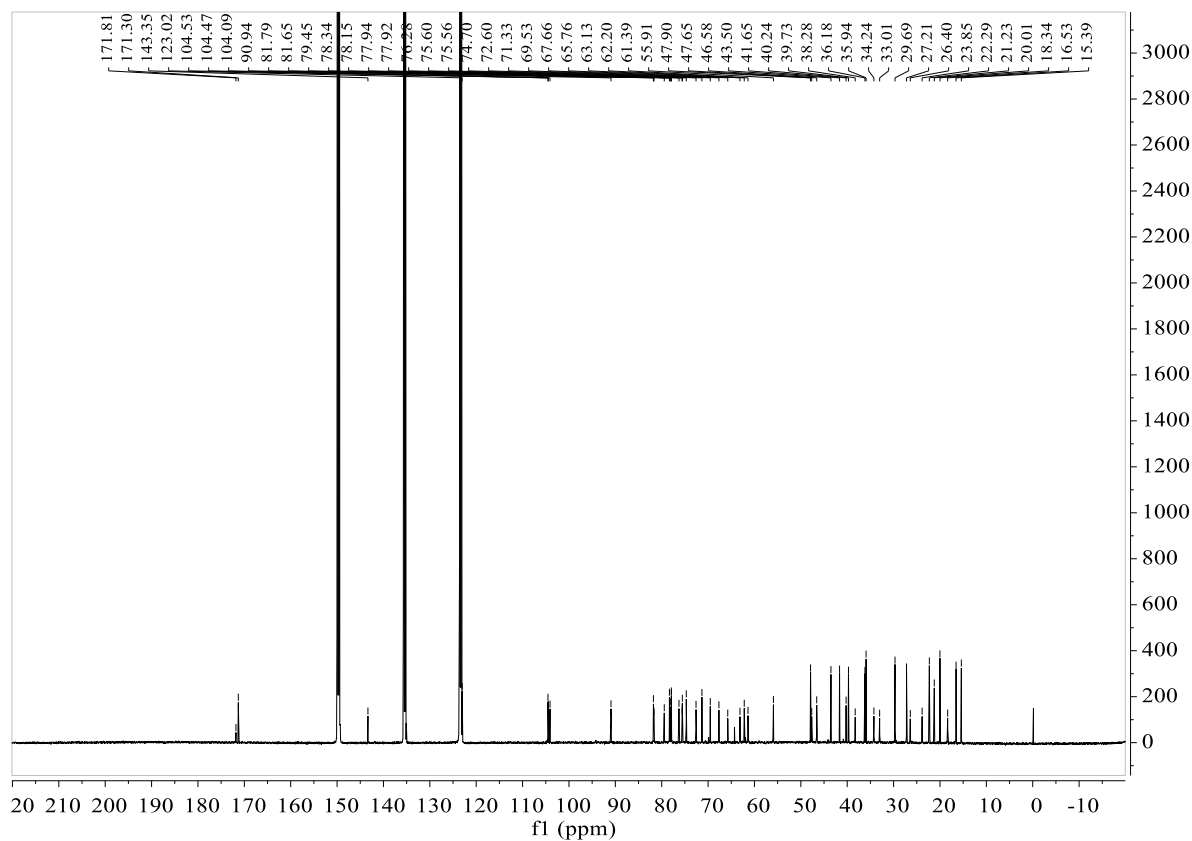

**S138.**  $^{13}\text{C}$  NMR Spectrum (150 MHz, Pyridine- $d_5$ ) of the new compound **27**

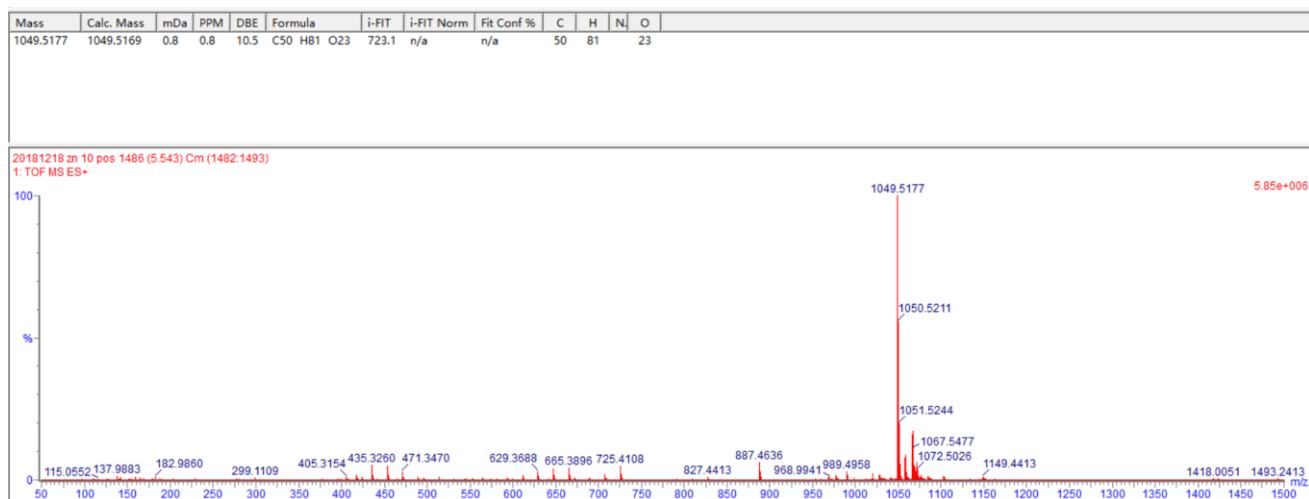

**S139.** HRESIMS spectrum of the new compound **27**

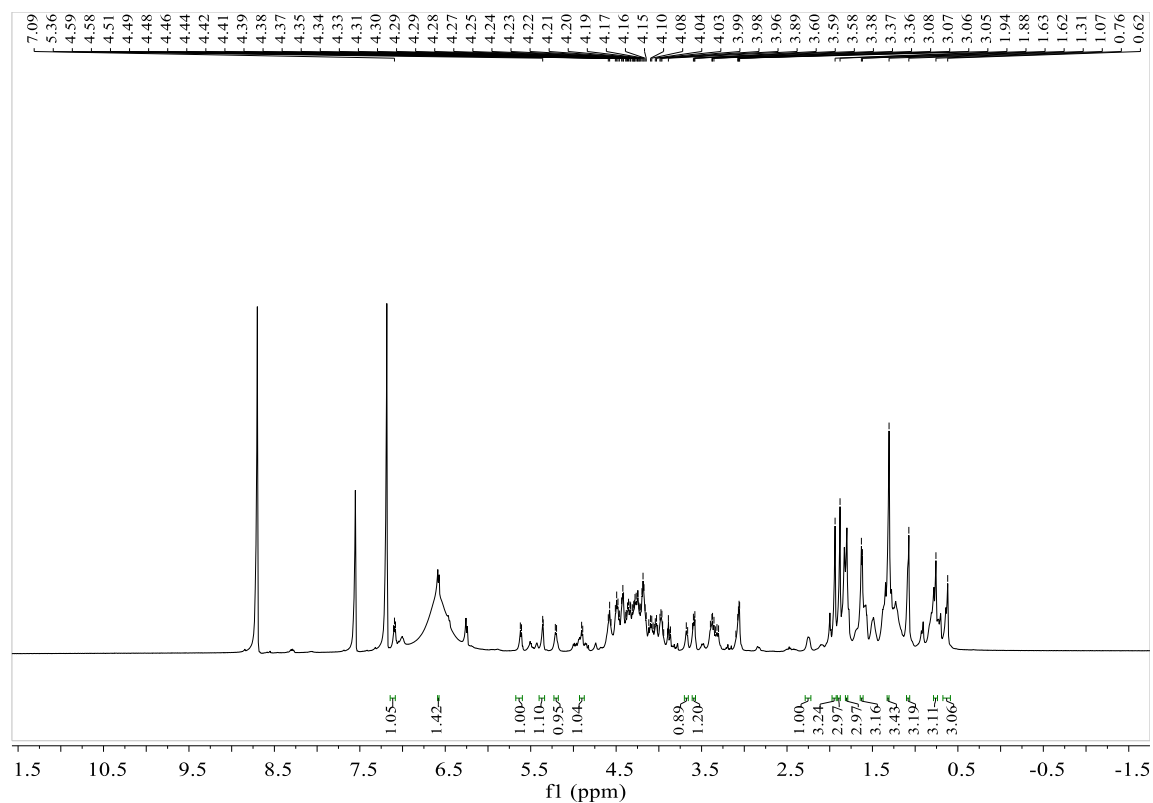

**S140.** <sup>1</sup>H NMR Spectrum (600 MHZ, Pyridine-*d*<sub>5</sub>) of the new compound **28**

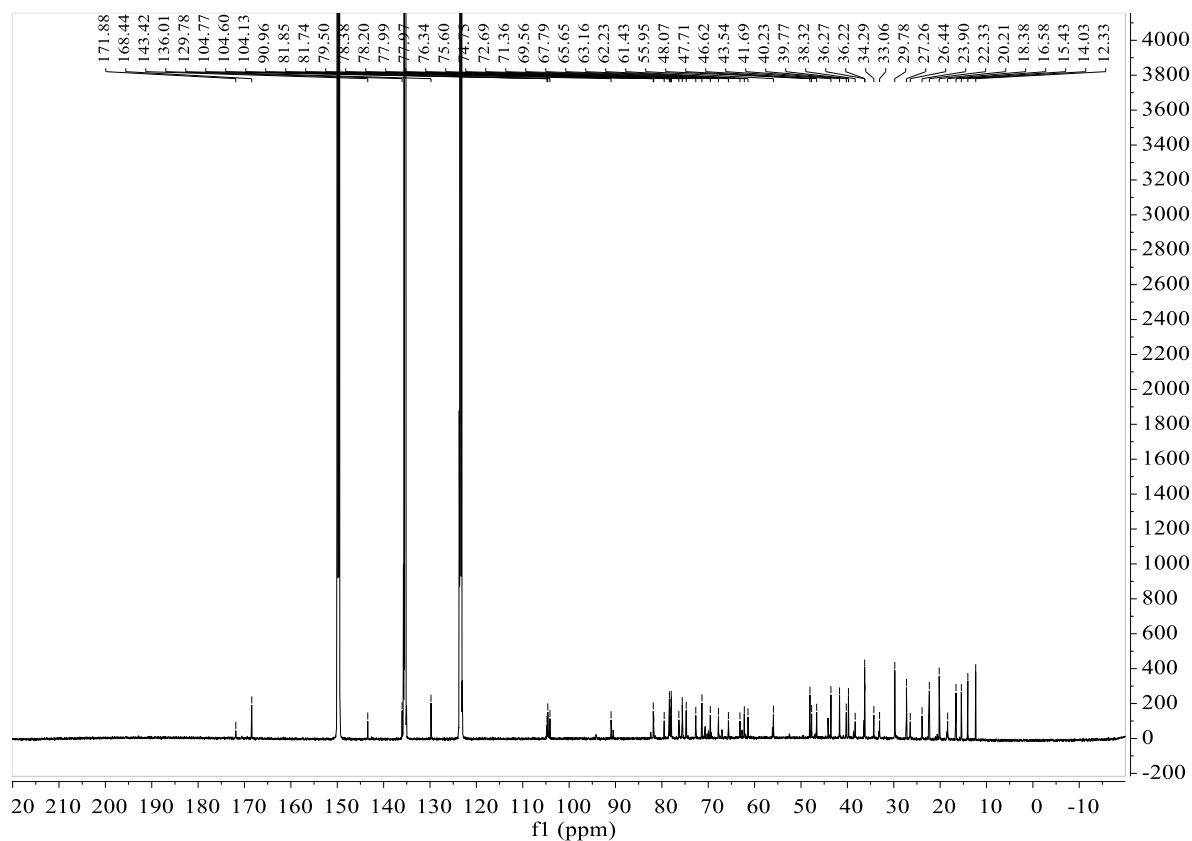

**S141.**  $^{13}\text{C}$  NMR Spectrum (150 MHz, Pyridine- $d_5$ ) of the new compound **28**

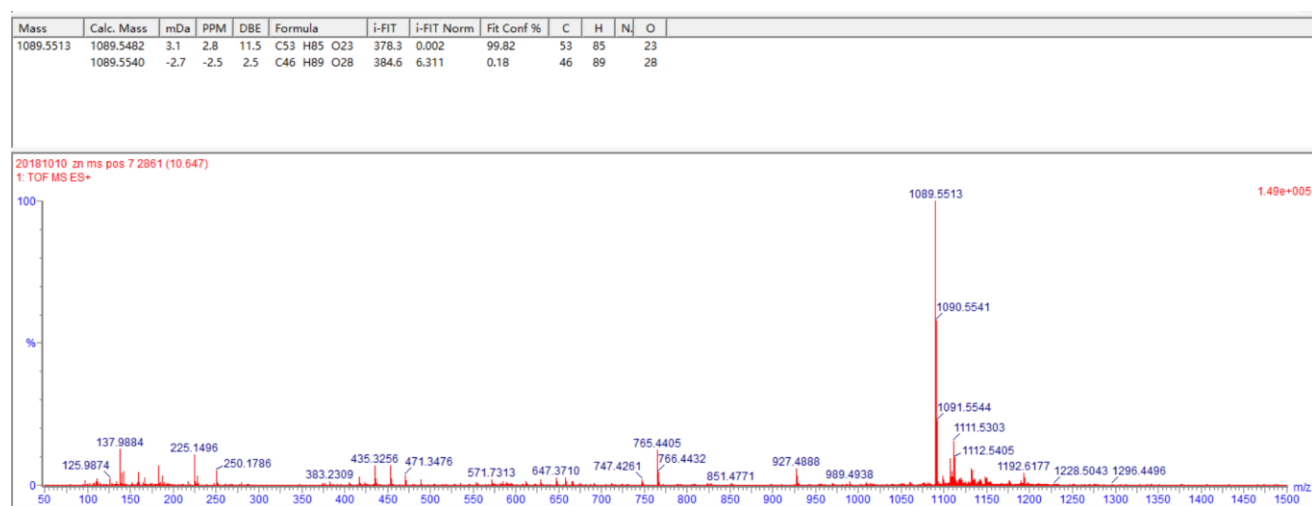

**S142.** HRESIMS spectrum of the new compound **28**



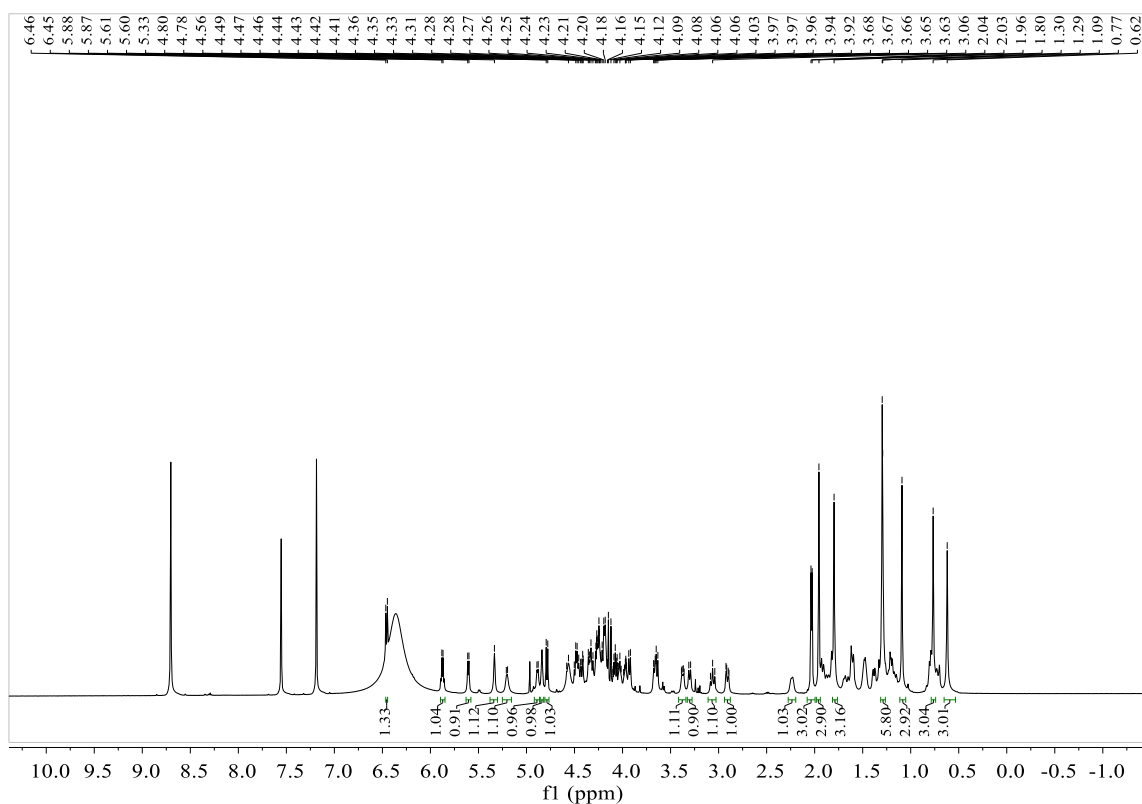

**S143.  $^1\text{H}$  NMR Spectrum (600 MHz, Pyridine- $d_5$ ) of the new compound **29****

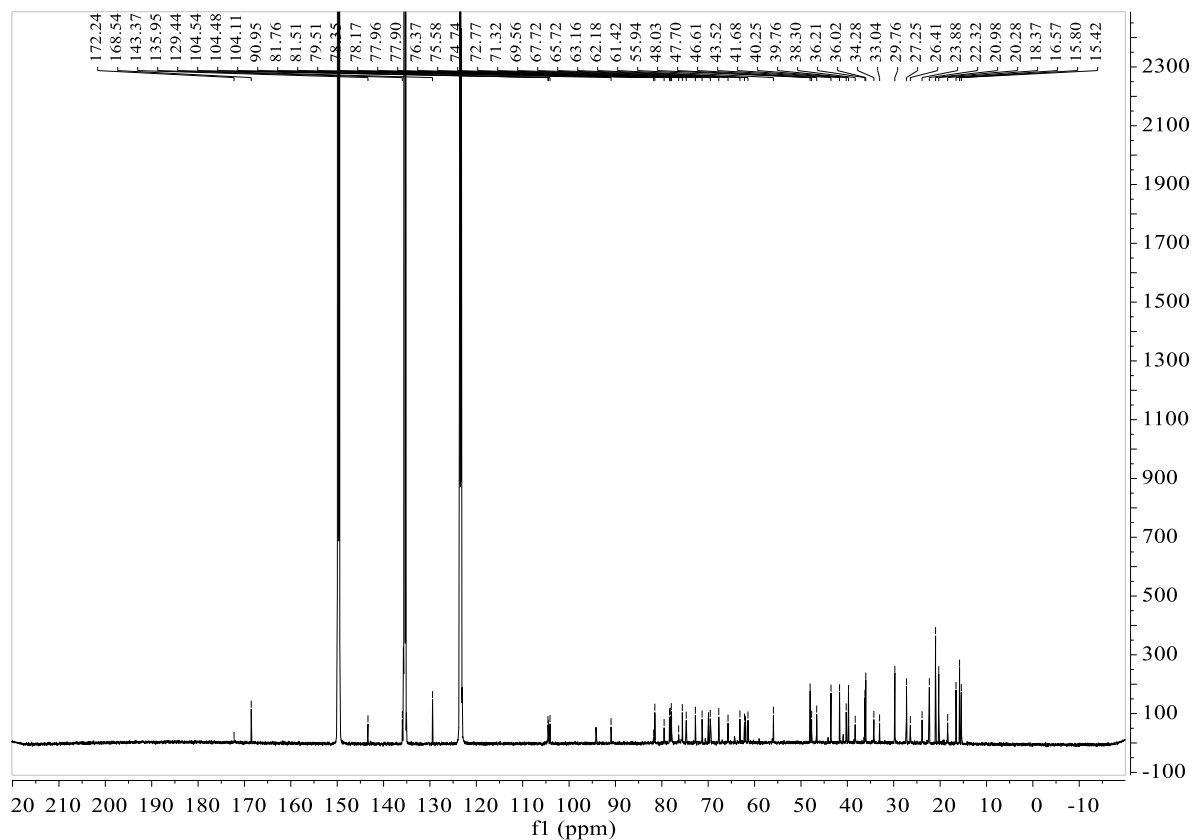

**S144.  $^{13}\text{C}$  NMR Spectrum (150 MHz, Pyridine- $d_5$ ) of the new compound **29****

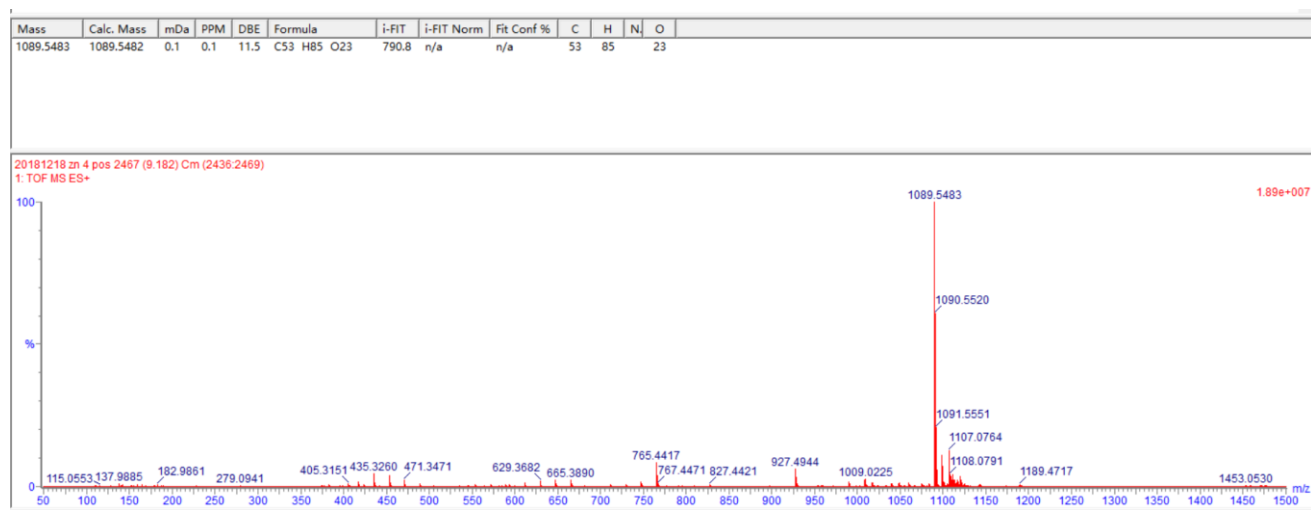

**S145.** HRESIMS spectrum of the new compound **29**

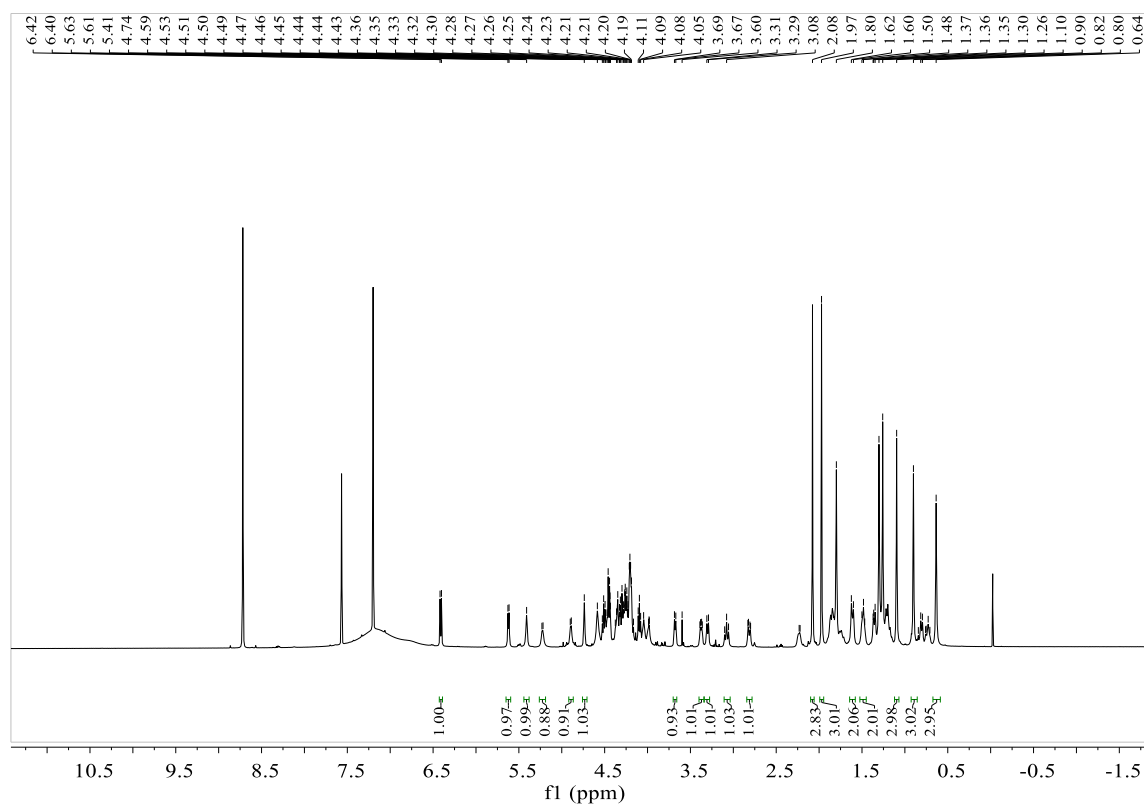

**S146.** <sup>1</sup>H NMR Spectrum (600 MHZ, Pyridine-*d*<sub>5</sub>) of the new compound **30**

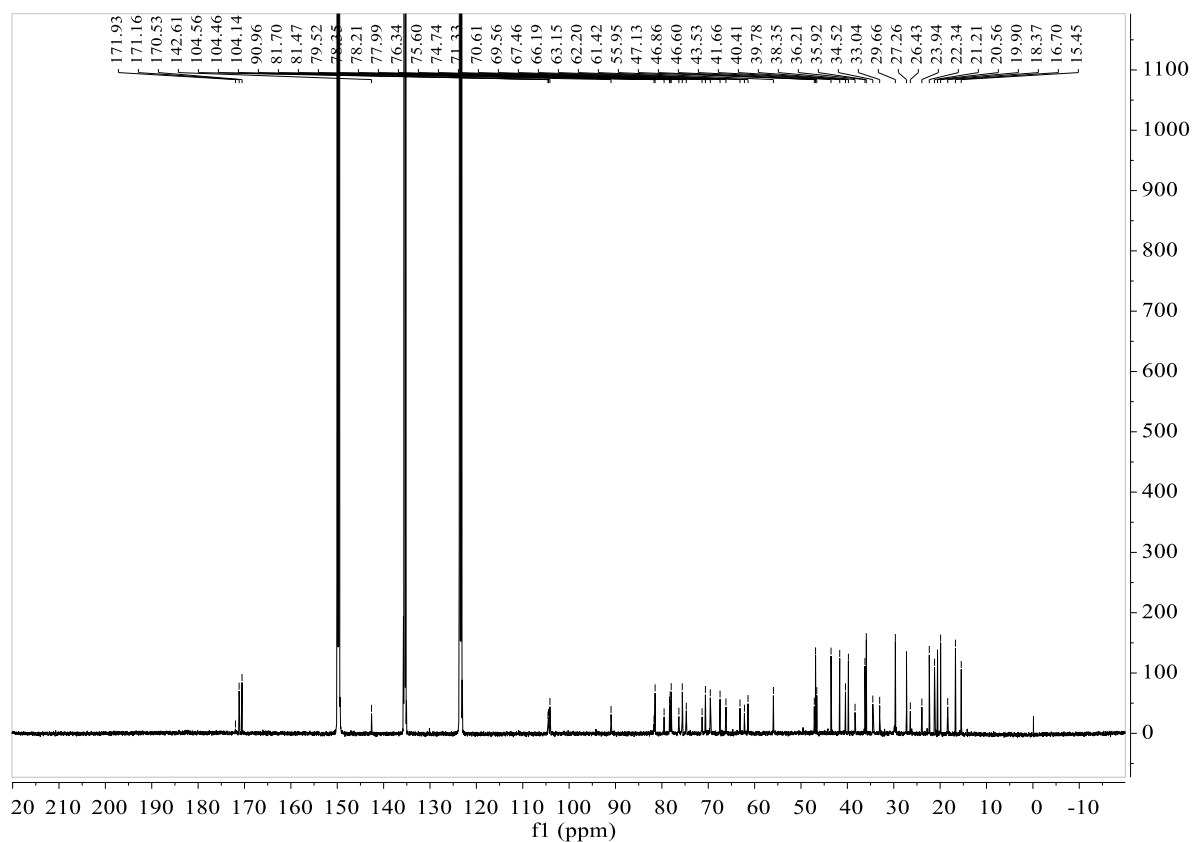

**S147.**  $^{13}\text{C}$  NMR Spectrum (150 MHz, Pyridine- $d_5$ ) of the new compound **30**

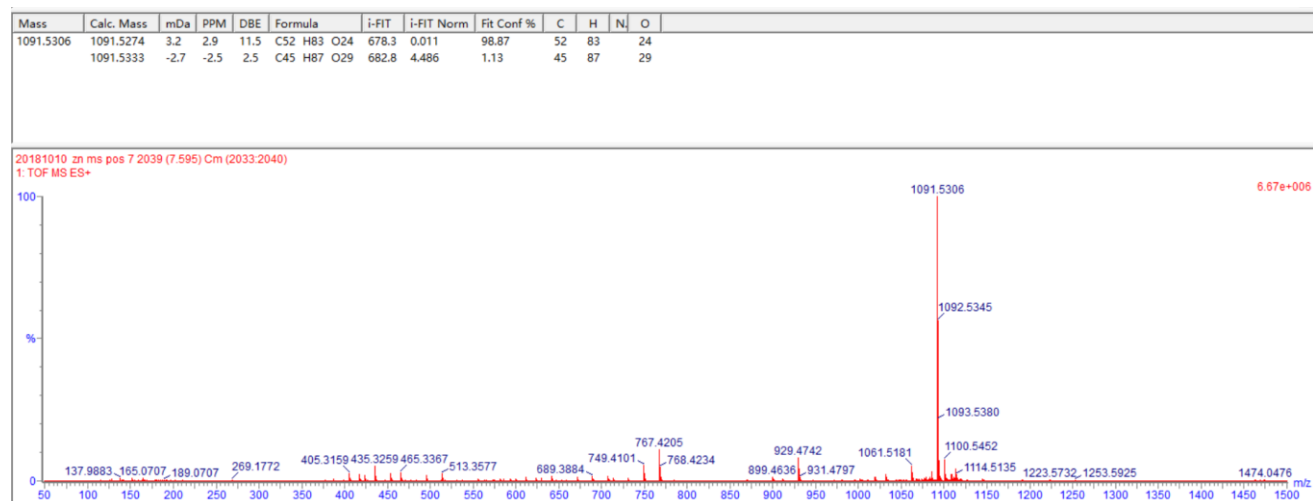

**S148.** HRESIMS spectrum of the new compound **30**

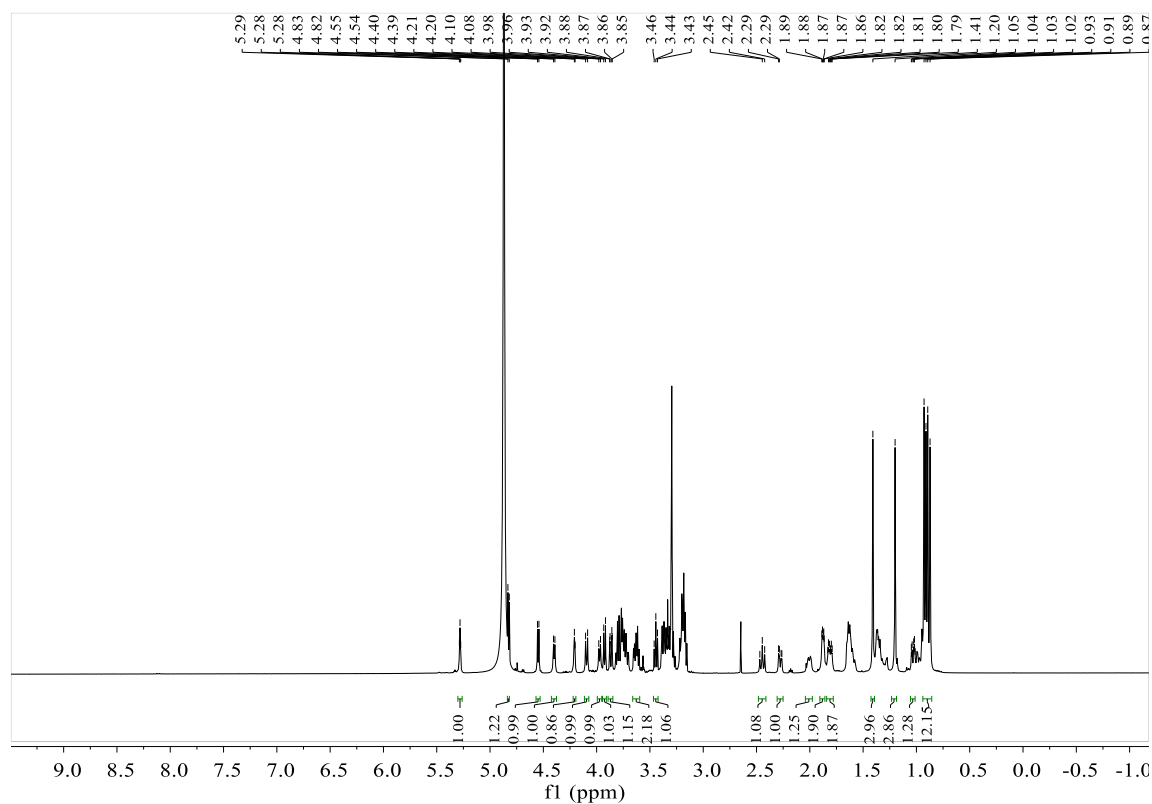

**S149.** <sup>1</sup>H NMR Spectrum (600 MHz, Methanol-*d*<sub>4</sub>) of the new compound **31**

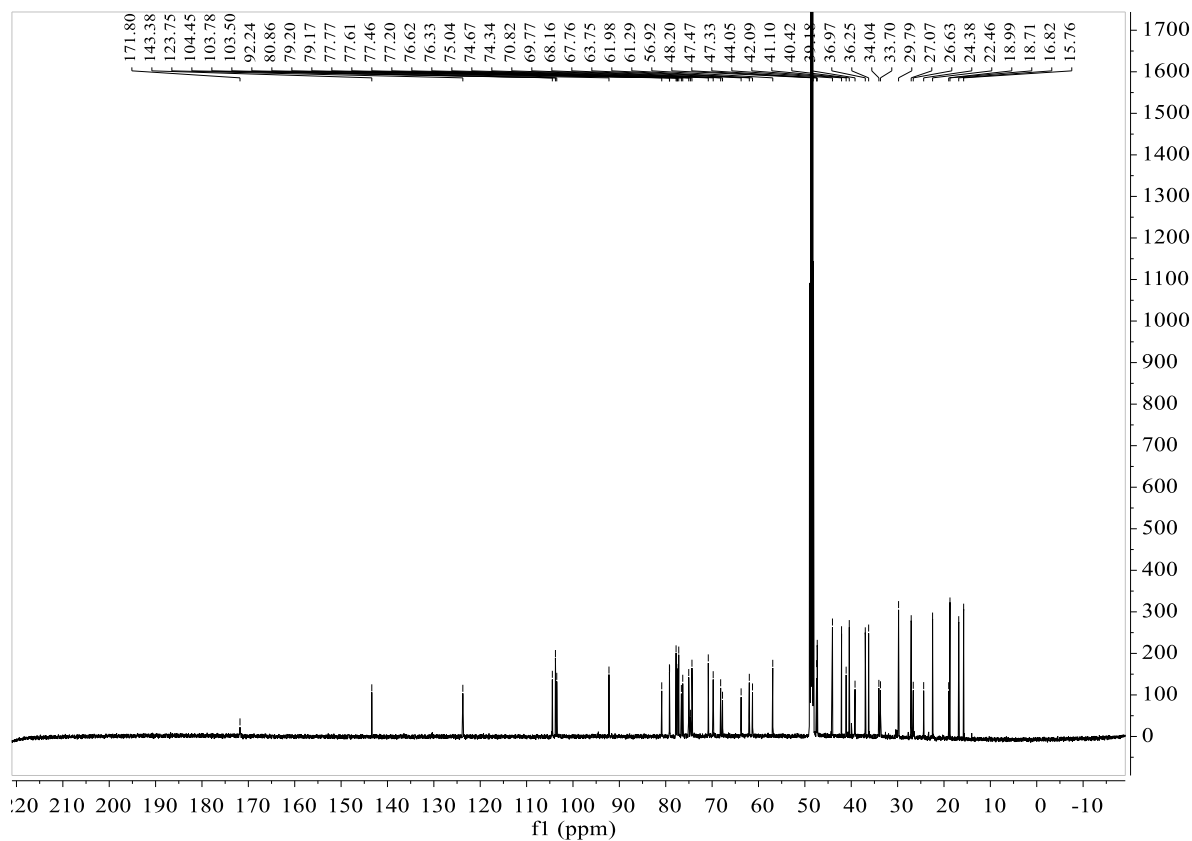

**S150.** <sup>13</sup>C NMR Spectrum (150 MHz, Methanol-*d*<sub>4</sub>) of the new compound **31**

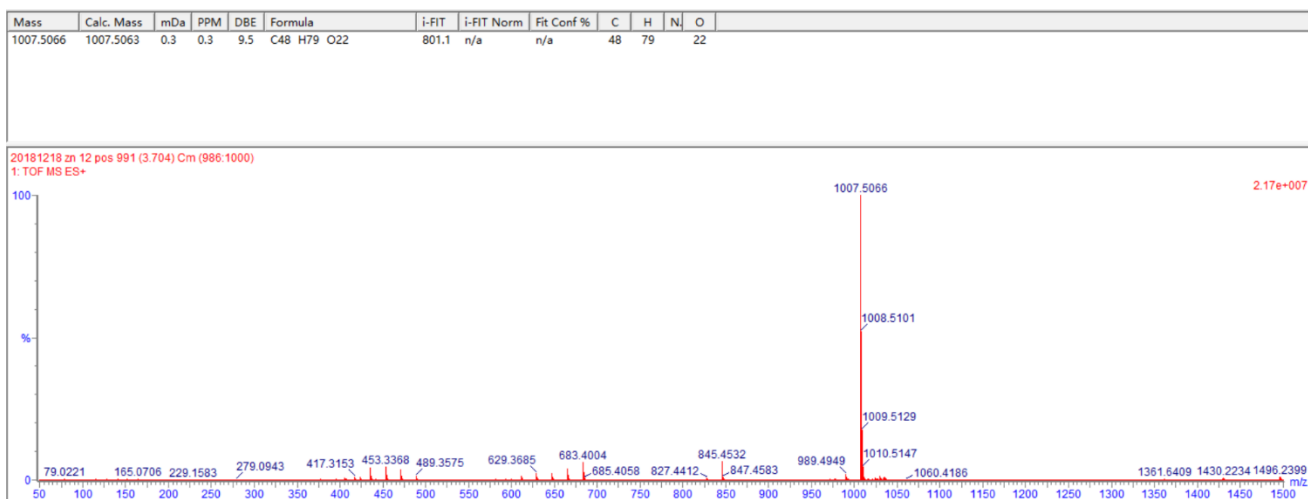

**S151.** HRESIMS spectrum of the new compound **31**

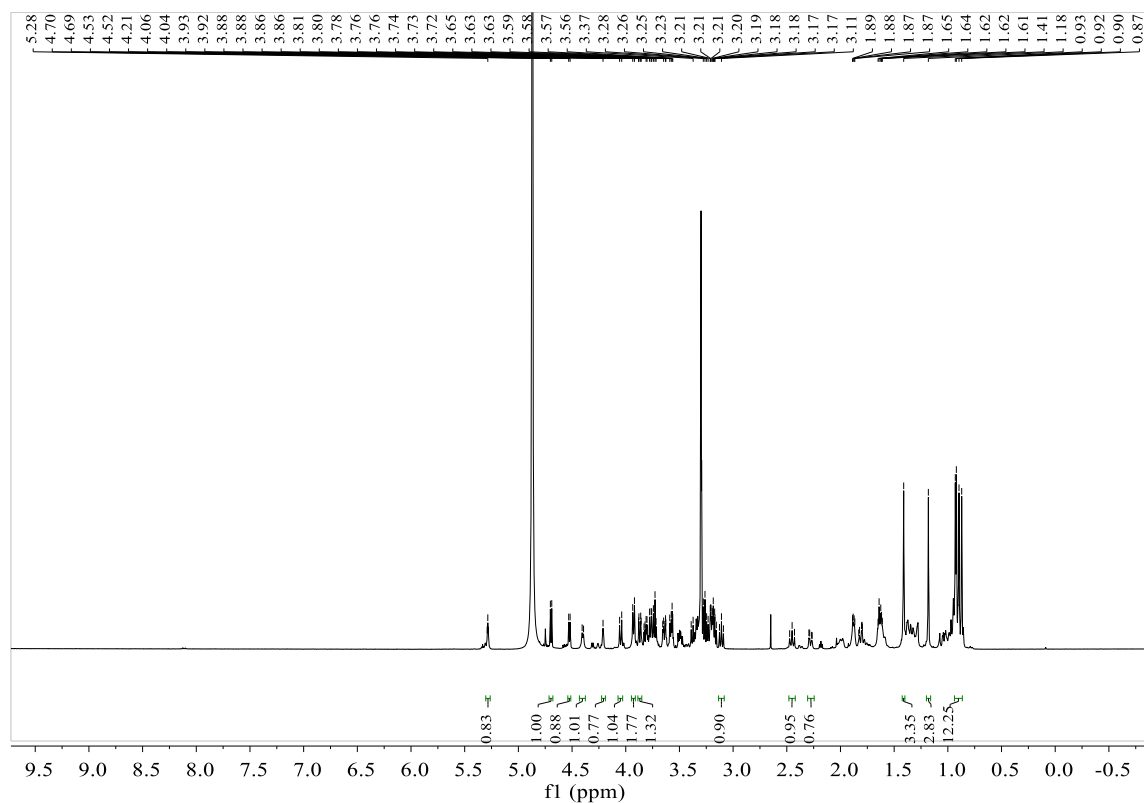

**S152.** <sup>1</sup>H NMR Spectrum (600 MHz, Methanol-*d*<sub>4</sub>) of the new compound **32**

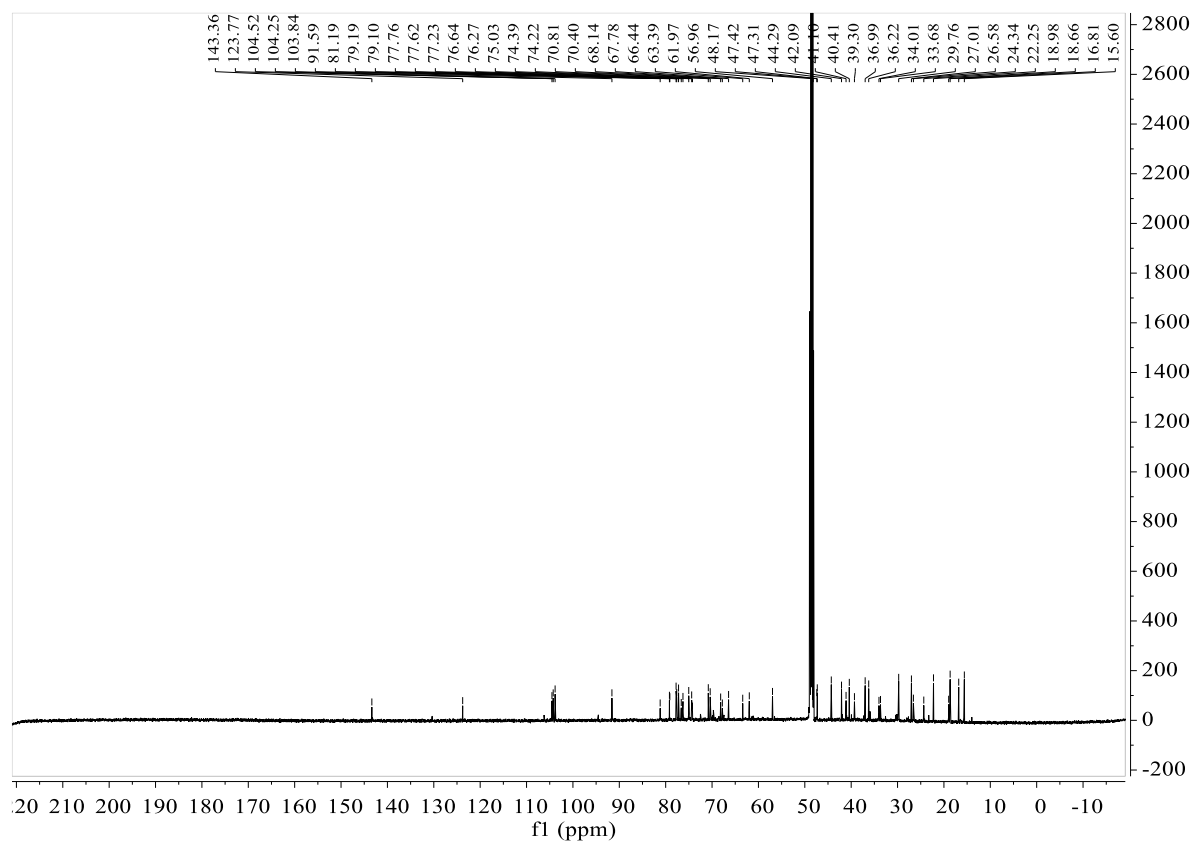

**S153.**  $^{13}\text{C}$  NMR Spectrum (150 MHz, Methanol- $d_4$ ) of the new compound **32**

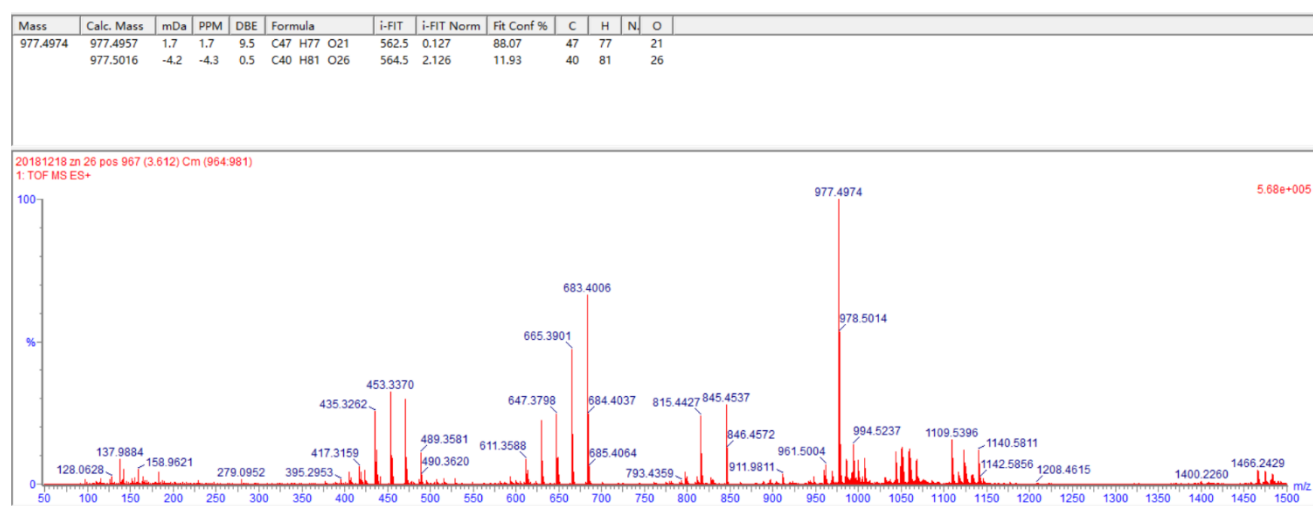

**S154.** HRESIMS spectrum of the new compound **32**

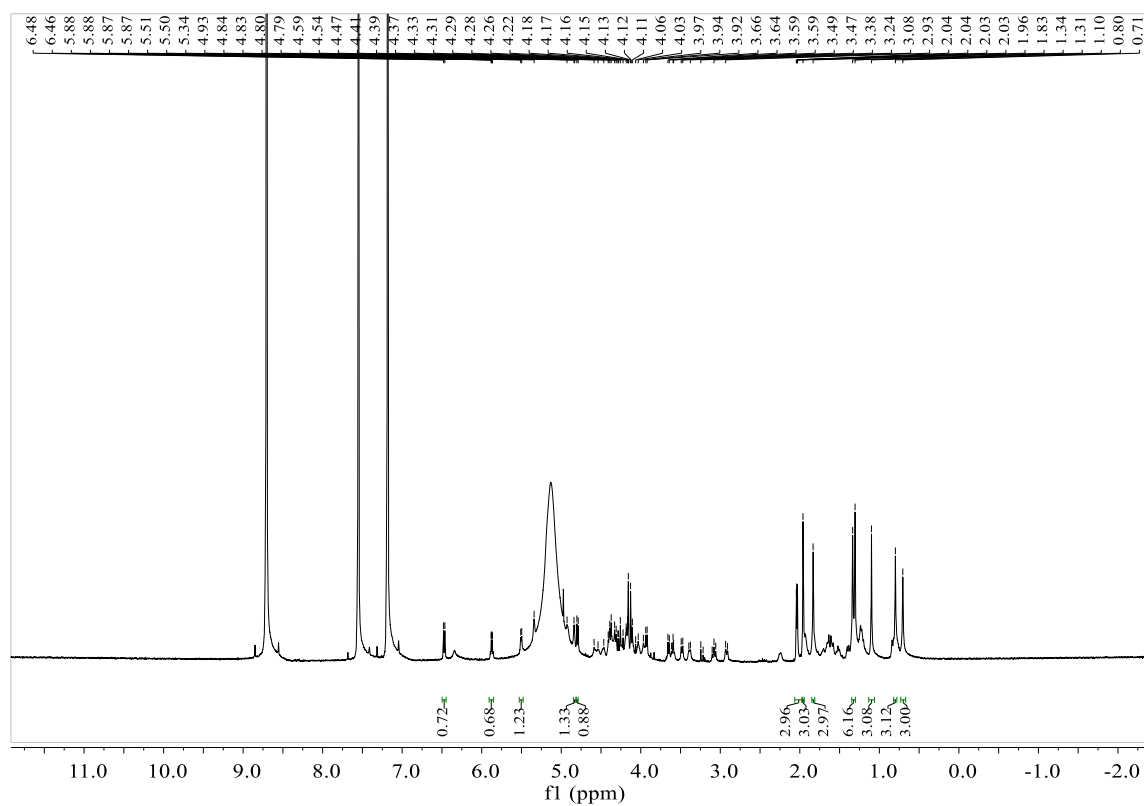

**S155.** <sup>1</sup>H NMR Spectrum (600 MHz, Pyridine-*d*<sub>5</sub>) of the new compound **33**

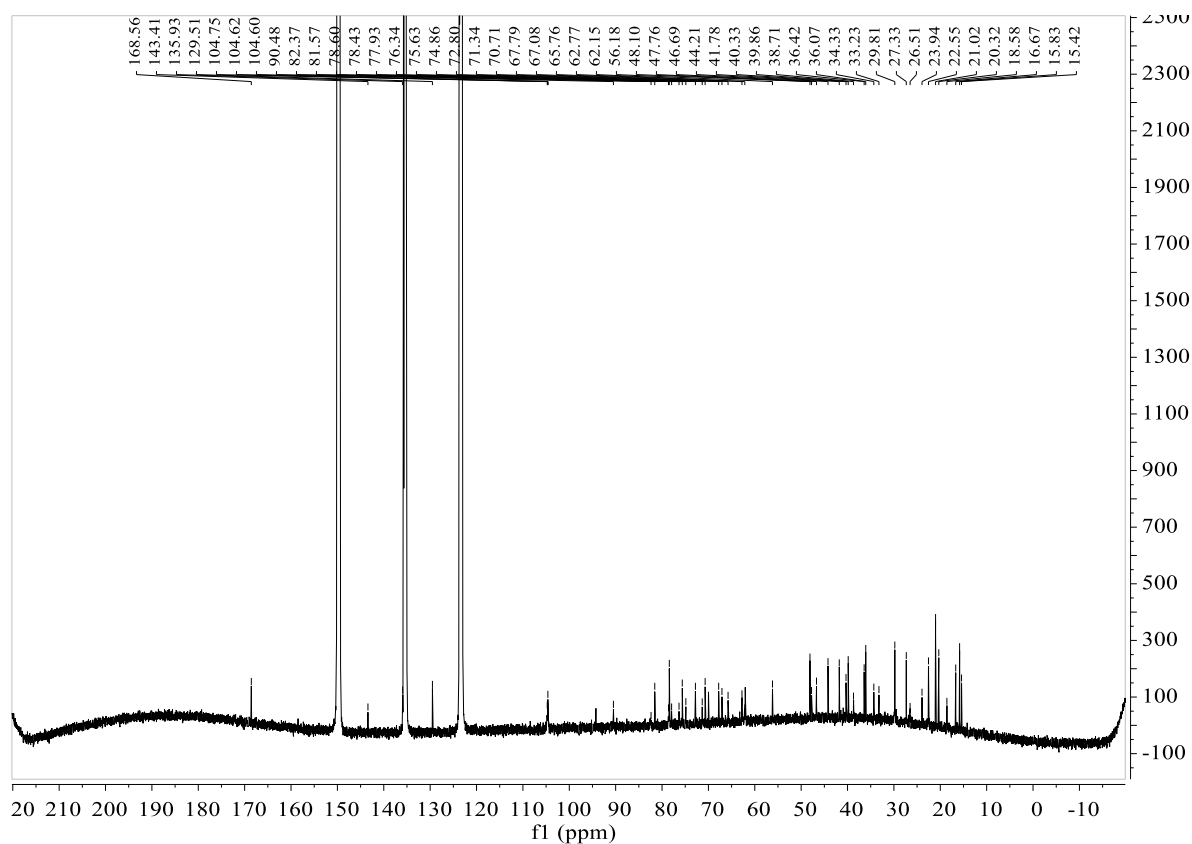

**S156.** <sup>13</sup>C NMR Spectrum (150 MHz, Pyridine-*d*<sub>5</sub>) of the new compound **33**

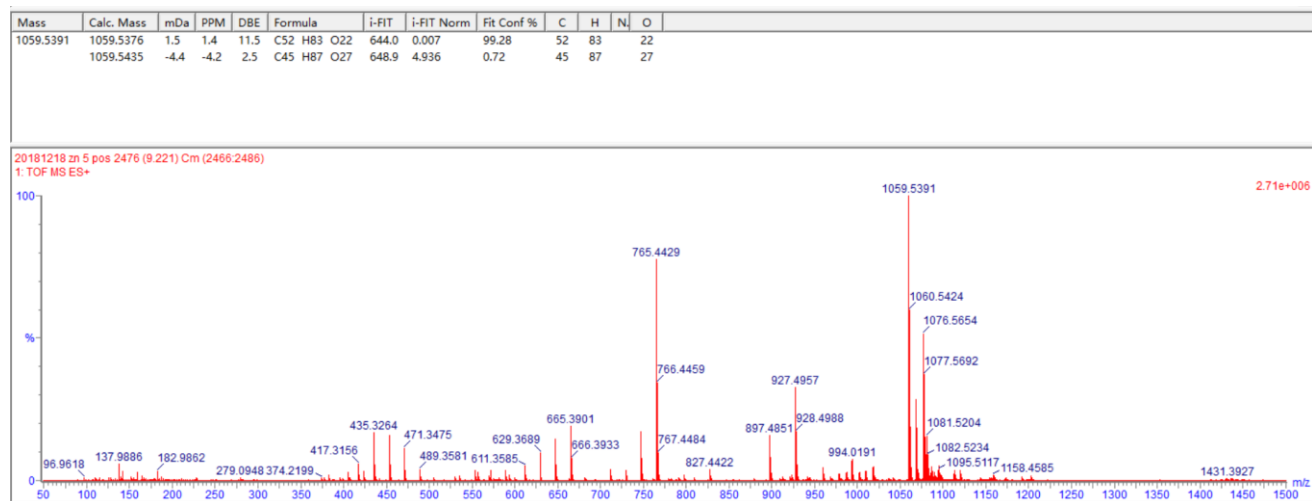

**S157.** HRESIMS spectrum of the new compound **33**
